# Supplementary material for: Association between promoter DNA methylation and gene expression in the pathogenesis of ischemic stroke
Source: Aging (Albany NY). 2019 Sep 17;11(18):7663–77. doi: 10.18632/aging.102278 (PMC6781986; doi:10.18632/aging.102278)
Supplement: Supplementary Table 1 [file aging-11-102278-s002.xlsx]

## Sheet: Supplementary Table 1
ID	adj.P.Val	P.Value	t	B	logFC	CHR	MAPINFO	Probe_SNPs_10	UCSC_RefGene_Name	UCSC_CpG_Islands_Name	DMR	Enhancer	RANGE_START	RANGE_END	UCSC_RefGene_Group
cg02321519	0.967	6.33e-06	5.25047	3.1	0.0651	10	29844493	rs61623705	SVIL			TRUE	29844493	29844616	5'UTR
cg12868494	0.967	5.521e-05	4.5496	0.9668	0.0554	14	100193110		CYP46A1	chr14:100196443-100197077			100193110	100193233	3'UTR
cg02447462	0.967	0.0001417	-4.23831	0.0456	-0.132	19	861071		CFD	chr19:860517-862123			861071	861194	Body
cg05269323	0.967	0.00015723	4.20364	-0.0556	0.126	7	150067712	rs3757423	REPIN1	chr7:150068756-150070051		TRUE	150067712	150067835	5'UTR
cg23409074	0.967	0.00026437	-4.0291	-0.5607	-0.0864	8	67090798		CRH	chr8:67089249-67089962			67090798	67090921	TSS200
cg09084320	0.967	0.00027411	4.01685	-0.5959	0.0565	10	33553435		NRP1			TRUE	33553435	33553558	Body
cg21885112	0.967	0.00036781	3.917	-0.8807	0.285	6	32557970	rs9270341	HLA-DRB1				32557970	32558093	TSS1500
cg05868365	0.967	0.00036785	-3.91696	-0.8808	-0.0627	7	1584479	rs1550008	TMEM184A	chr7:1584054-1584345			1584479	1584602	3'UTR
cg01601712	0.967	0.00039099	3.89615	-0.9398	0.19	6	32635948	rs2647025	HLA-DQB1	chr6:32632158-32633027			32635948	32636071	TSS1500
cg17583158	0.967	0.00040067	3.88779	-0.9635	0.102	8	2037874	rs61732774	MYOM2	chr8:2037706-2037986			2037874	2037997	Body
cg25687179	0.967	0.00048916	3.81939	-1.1562	0.0643	19	39440924	rs2304117	FBXO17	chr19:39440404-39441011			39440924	39441047	Body
cg20218135	0.967	0.00048978	3.81896	-1.1575	0.347	19	17409380	rs12982058	ABHD8	chr19:17412036-17412417			17409380	17409503	Body
cg10368128	0.967	0.00050949	-3.80538	-1.1956	-0.0656	19	57702442		ZNF264	chr19:57702696-57703425			57702442	57702565	TSS1500
cg21467935	0.967	0.00052677	-3.7939	-1.2277	-0.0695	6	31781906		HSPA1L	chr6:31782872-31785190			31781906	31782029	5'UTR
cg23796967	0.967	0.00053519	-3.78843	-1.243	-0.0778	19	55549590	rs28385642	GP6				55549590	55549713	1stExon
cg05814312	0.967	0.00055187	3.77784	-1.2726	0.0522	10	29760687		SVIL			TRUE	29760687	29760810	Body
cg11030744	0.967	0.00056856	3.76756	-1.3013	0.108	3	10328490		GHRL			TRUE	10328490	10328613	Body
cg08580268	0.967	0.00057679	-3.77213	-1.2958	-0.111	7	150038502		RARRES2	chr7:150037459-150039031		TRUE	150038502	150038625	5'UTR
cg04001359	0.967	0.00058246	3.75921	-1.3246	0.0699	5	15683259		FBXL7			TRUE	15683259	15683382	Body
cg04725776	0.967	0.00058466	3.75791	-1.3283	0.0643	2	1800835	rs13420700	MYT1L	chr2:1801618-1802060			1800835	1800958	Body
cg17279839	0.967	0.000603	-3.74723	-1.358	-0.0771	7	150038598		RARRES2	chr7:150037459-150039031			150038598	150038721	5'UTR
cg08065229	0.967	0.00062521	-3.7347	-1.3929	-0.0834	19	16606621		C19orf44	chr19:16606740-16607444			16606621	16606744	TSS1500
cg09513276	0.967	0.00064945	-3.72151	-1.4295	-0.078	20	55836676		BMP7	chr20:55839287-55839766	CDMR		55836676	55836799	Body
cg13286582	0.967	0.00066004	3.7159	-1.4451	0.0518	2	37883934		CDC42EP3			TRUE	37883934	37884057	5'UTR
cg18673341	0.967	0.00072744	3.6821	-1.5386	0.314	7	22481962		MGC87042			TRUE	22481962	22482085	Body
cg23871367	0.967	0.00083612	3.6335	-1.6724	0.0554	6	168897991		SMOC2			TRUE	168897991	168898114	Body
cg13428561	0.967	0.00084181	-3.63113	-1.6789	-0.0619	17	42734659		C17orf104	chr17:42733486-42734626			42734659	42734782	Body
cg10910525	0.967	0.00084694	3.629	-1.6848	0.057	19	49658232		HRC	chr19:49660880-49661157			49658232	49658355	1stExon
cg05779963	0.967	0.00094439	3.5908	-1.7893	0.0503	X	15683204		TMEM27				15683204	15683327	TSS200
cg12548638	0.967	0.0009532	3.58754	-1.7982	0.0638	1	38226812		EPHA10	chr1:38227079-38227741			38226812	38226935	3'UTR
cg13165085	0.967	0.0009557	3.58662	-1.8007	0.0582	13	37453598		SMAD9				37453598	37453721	Body
cg22459924	0.967	0.00105213	3.55276	-1.8928	0.058	19	2607850	rs78181971	GNG7	chr19:2607725-2607967	DMR		2607850	2607973	5'UTR
cg02886208	0.967	0.00107472	3.54526	-1.9132	0.0851	11	14281011		SPON1	chr11:14280741-14281164		TRUE	14281011	14281134	Body
cg11143063	0.967	0.00108513	3.54186	-1.9224	0.0582	2	128177475		PROC	chr2:128180294-128181381			128177475	128177598	5'UTR
cg13224583	0.967	0.0011958	3.50748	-2.0153	0.0529	1	156883745		PEAR1			TRUE	156883745	156883868	Body
cg18865685	0.967	0.0011999	3.50627	-2.0186	0.0909	1	177001903	rs2076069	ASTN1			TRUE	177001903	177002026	Body
cg03916038	0.967	0.00138267	3.45585	-2.1541	0.0694	3	194903259	rs56283237	C3orf21			TRUE	194903259	194903382	Body
cg15059804	0.967	0.00138364	-3.4556	-2.1548	-0.0577	1	33766318		ZNF362			TRUE	33766318	33766441	3'UTR
cg08430277	0.967	0.00142392	3.44536	-2.1822	0.116	16	15858790		MYH11			TRUE	15858790	15858913	Body
cg12529273	0.967	0.00143387	-3.44287	-2.1888	-0.0539	4	54458246		LNX1			TRUE	54458246	54458369	TSS1500
cg05278074	0.967	0.00172772	3.37601	-2.3666	0.0505	7	92442568		CDK6			TRUE	92442568	92442691	Body
cg06627617	0.967	0.0017629	3.36875	-2.3858	0.079	2	9471179		ASAP2			TRUE	9471179	9471302	Body
cg03720762	0.967	0.00177637	-3.36601	-2.393	-0.0683	17	17604184		RAI1	chr17:17603583-17604147		TRUE	17604184	17604307	5'UTR
cg26548497	0.967	0.00179097	-3.36306	-2.4008	-0.0783	2	219537567		STK36	chr2:219536410-219536813	RDMR		219537567	219537690	Body
cg02824443	0.967	0.00180772	3.3597	-2.4097	0.0538	7	108093448		NRCAM	chr7:108095401-108097206			108093448	108093571	5'UTR
cg06993512	0.967	0.00197517	-3.32768	-2.4939	-0.0582	5	151305143		GLRA1	chr5:151304226-151304824			151305143	151305266	TSS1500
cg20019489	0.967	0.0020804	-3.30886	-2.5432	-0.0513	20	57414351		GNASAS	chr20:57414595-57414896			57414351	57414474	Body
cg20648149	0.967	0.00210132	-3.30522	-2.5527	-0.0832	14	64319089		SYNE2	chr14:64319622-64320526			64319089	64319212	TSS1500
cg15567297	0.967	0.00213906	3.29875	-2.5697	0.0513	15	90029474		RHCG	chr15:90029931-90030328		TRUE	90029474	90029597	Body
cg07582993	0.967	0.00215437	3.29616	-2.5764	0.0565	20	3137766		UBOX5	chr20:3140295-3140570			3137766	3137889	5'UTR
cg25809905	0.967	0.00215909	-3.29537	-2.5785	-0.073	17	42467728		ITGA2B				42467728	42467851	TSS1500
cg14398661	0.967	0.0021677	-3.29392	-2.5823	-0.0544	9	129433779		LMX1B	chr9:129433766-129433970		TRUE	129433779	129433902	Body
cg22129220	0.967	0.00218573	3.2909	-2.5901	0.0779	6	24909127		FAM65B	chr6:24910626-24911285		TRUE	24909127	24909250	5'UTR
cg04710115	0.967	0.00223723	3.28243	-2.6122	0.051	6	41123396	rs59316704	TREML1				41123396	41123519	TSS1500
cg25274185	0.967	0.00225247	3.27995	-2.6187	0.0501	13	32611483		FRY			TRUE	32611483	32611606	Body
cg02092790	0.967	0.0022614	3.27851	-2.6224	0.0617	17	39094800		KRT23				39094800	39094923	TSS1500
cg19275008	0.967	0.00234266	3.26563	-2.6559	0.0529	2	37882358		CDC42EP3			TRUE	37882358	37882481	5'UTR
cg15234492	0.967	0.00244249	-3.25038	-2.6955	-0.0606	12	122019076		KDM2B	chr12:122016170-122017693	RDMR		122019076	122019199	TSS200
cg15791180	0.967	0.00247737	3.25162	-2.6908	0.0854	12	106513098	rs34625158	NUAK1			TRUE	106513098	106513221	Body
cg04231888	0.967	0.00248544	3.244	-2.712	0.0655	11	19411473		NAV2			TRUE	19411473	19411596	Body
cg04233620	0.967	0.00254083	3.23593	-2.7329	0.0731	21	46629219		ADARB1			TRUE	46629219	46629342	Body
cg04711622	0.967	0.00257824	3.23057	-2.7467	0.0522	5	64578638		ADAMTS6			TRUE	64578638	64578761	Body
cg19360907	0.967	0.00258467	-3.22966	-2.7491	-0.0639	22	37977445		LGALS2				37977445	37977568	TSS1500
cg24118856	0.967	0.00264607	3.22104	-2.7713	0.0758	19	10223710		PPAN-P2RY11	chr19:10224442-10225138		TRUE	10223710	10223833	Body
cg25310824	0.967	0.00264816	-3.22075	-2.7721	-0.0566	5	42812334		SEPP1				42812334	42812457	TSS1500
cg05385188	0.967	0.00273299	3.20916	-2.8019	0.0641	17	80215375		CSNK1D	chr17:80211646-80213142			80215375	80215498	Body
cg25397663	0.967	0.00274325	-3.20778	-2.8055	-0.0604	4	124622		ZNF718	chr4:124332-124841	DMR		124622	124745	Body
cg16887422	0.967	0.00276267	-3.20519	-2.8121	-0.0503	2	240035107		HDAC4	chr2:240033147-240033453		TRUE	240035107	240035230	Body
cg22853855	0.967	0.00279654	-3.2007	-2.8237	-0.203	19	34111400	rs73029337	CHST8	chr19:34112279-34114353			34111400	34111523	TSS1500
cg07298363	0.967	0.00280734	3.19928	-2.8273	0.057	5	52118798		ITGA1			TRUE	52118798	52118921	Body
cg17815049	0.967	0.00285805	-3.19268	-2.8442	-0.0696	1	246728663		CNST	chr1:246729207-246730276			246728663	246728786	TSS1500
cg01185754	0.967	0.00301467	-3.17299	-2.8947	-0.0711	1	95006729		F3	chr1:95006837-95008051	RDMR		95006729	95006852	Body
cg08133919	0.967	0.00311586	-3.16077	-2.9258	-0.0605	15	52822439		MYO5A	chr15:52820333-52821639			52822439	52822562	TSS1500
cg20015401	0.967	0.00312166	3.16009	-2.9276	0.05	11	95922296		MAML2			TRUE	95922296	95922419	Body
cg15902329	0.967	0.00317964	3.15327	-2.945	0.148	11	18956196	rs2014931	MRGPRX1				18956196	18956319	1stExon
cg03502002	0.967	0.00319893	-3.15102	-2.9507	-0.0829	18	74962133		GALR1	chr18:74961556-74963822	DMR	TRUE	74962133	74962256	1stExon
cg13655986	0.967	0.00324843	3.14533	-2.9652	0.155	10	129197384	rs2296633	DOCK1	chr10:129195296-129195566		TRUE	129197384	129197507	Body
cg26648185	0.967	0.00334129	3.13486	-2.9918	0.0515	21	32927013		TIAM1	chr21:32929927-32932017		TRUE	32927013	32927136	5'UTR
cg13121938	0.967	0.0033475	3.13417	-2.9935	0.0663	13	114871497		RASA3	chr13:114868894-114869836			114871497	114871620	Body
cg10590622	0.967	0.0033941	3.12903	-3.0066	0.186	4	96760945	rs1076860	PDHA2				96760945	96761068	TSS1500
cg08136432	0.967	0.00349683	3.11793	-3.0347	0.269	16	88902276	rs12934499	GALNS	chr16:88902175-88902467			88902276	88902399	Body
cg02215171	0.967	0.00360034	-3.10706	-3.0622	-0.0542	4	89379156		HERC5	chr4:89378223-89378948			89379156	89379279	Body
cg25104727	0.967	0.00376304	3.09054	-3.1038	0.0757	1	177001793		ASTN1				177001793	177001916	Body
cg02512226	0.967	0.0038068	-3.08622	-3.1147	-0.0691	10	28288192		ARMC4	chr10:28287447-28288057			28288192	28288315	TSS1500
cg07057320	0.967	0.0038371	3.08325	-3.1221	0.0511	21	37852479		CLDN14				37852479	37852602	5'UTR
cg13578465	0.967	0.00385718	-3.0813	-3.127	-0.0508	14	105167457		INF2	chr14:105167277-105167501			105167457	105167580	5'UTR
cg20955836	0.967	0.00400673	-3.06703	-3.1628	-0.0612	20	55836224		BMP7	chr20:55839287-55839766	CDMR		55836224	55836347	Body
cg04195684	0.967	0.00402888	3.06496	-3.168	0.0504	22	50515473		MLC1	chr22:50515141-50515474			50515473	50515596	Body
cg07102397	0.967	0.00418002	-3.05112	-3.2026	-0.0719	14	89864727		FOXN3			TRUE	89864727	89864850	Body
cg01425746	0.967	0.00419803	3.0495	-3.2067	0.0646	11	45671369		CHST1	chr11:45671197-45672412			45671369	45671492	Body
cg24068006	0.967	0.00426013	3.04398	-3.2205	0.193	10	466825	rs10795122	DIP2C	chr10:465928-466396			466825	466948	Body
cg24019073	0.967	0.00426022	3.04397	-3.2205	0.0781	19	4448726		UBXN6	chr19:4446011-4446629		TRUE	4448726	4448849	Body
cg04432319	0.967	0.00429014	-3.04133	-3.227	-0.0537	20	13200931		ISM1	chr20:13200670-13202616			13200931	13201054	TSS1500
cg00597445	0.967	0.00431276	3.03935	-3.232	0.144	4	5888193	rs3774896	CRMP1	chr4:5889203-5890645	CDMR		5888193	5888316	Body
cg05388281	0.967	0.00436567	-3.03475	-3.2434	-0.111	4	125504		ZNF718	chr4:124332-124841			125504	125627	Body
cg17661135	0.967	0.0043858	3.03302	-3.2478	0.0528	8	32441430		NRG1			TRUE	32441430	32441553	Body
cg21104965	0.967	0.00440491	3.03138	-3.2518	0.0797	6	117869453		DCBLD1	chr6:117869097-117869530		TRUE	117869453	117869576	Body
cg09852127	0.967	0.00456797	-3.01765	-3.2859	-0.0633	5	140254845		PCDHA12	chr5:140255158-140255450			140254845	140254968	TSS200
cg14984781	0.967	0.00461283	-3.01395	-3.2951	-0.0559	17	31867		DOC2B	chr17:29994-31868			31867	31990	TSS1500
cg10562586	0.967	0.00476485	-3.00167	-3.3255	-0.0628	2	210444154		MAP2			TRUE	210444154	210444277	TSS1500
cg25539255	0.967	0.00496114	-2.98635	-3.3634	-0.0942	19	4902950	rs2602717	ARRDC5				4902950	4903073	TSS200
cg13443627	0.967	0.00499015	-2.98413	-3.3688	-0.0657	1	59043070		TACSTD2	chr1:59042013-59043295		TRUE	59043070	59043193	5'UTR
cg25377206	0.967	0.00499459	-2.9838	-3.3696	-0.0507	7	35294658		TBX20	chr7:35292985-35294674	RDMR	TRUE	35294658	35294781	TSS1500
cg08599355	0.967	0.00503489	-2.98074	-3.3772	-0.0889	13	99714609		DOCK9			TRUE	99714609	99714732	Body
cg03295928	0.967	0.00506517	-2.97846	-3.3828	-0.0615	2	74669349		RTKN	chr2:74667593-74669403			74669349	74669472	TSS1500
cg23458168	0.967	0.00517316	-2.97043	-3.4025	-0.068	19	30864867		ZNF536	chr19:30865683-30866490	RDMR	TRUE	30864867	30864990	5'UTR
cg22753548	0.967	0.00517688	-2.97016	-3.4032	-0.0601	19	55668066		TNNI3	chr19:55667532-55668465			55668066	55668189	Body
cg15122993	0.967	0.00527324	-2.96313	-3.4205	-0.0593	5	140256817		PCDHA7	chr5:140256273-140257290			140256817	140256940	Body
cg21428954	0.967	0.00528223	2.96248	-3.4221	0.0529	22	46760505		CELSR1	chr22:46760450-46760679			46760505	46760628	Body
cg14192029	0.967	0.00536478	-2.95656	-3.4366	-0.0738	4	126058		ZNF718	chr4:124332-124841			126058	126181	Body
cg08973950	0.967	0.00545088	-2.95048	-3.4515	-0.0594	7	1083309		C7orf50	chr7:1084387-1084595			1083309	1083432	Body
cg16248329	0.967	0.00546288	-2.94964	-3.4535	-0.0667	4	187644739		FAT1	chr4:187644319-187648253			187644739	187644862	5'UTR
cg06549275	0.967	0.00547321	2.94892	-3.4553	0.0592	2	9471231		ASAP2			TRUE	9471231	9471354	Body
cg10823511	0.967	0.00553259	2.94479	-3.4654	0.0857	7	141630634	rs73525929	CLEC5A				141630634	141630757	Body
cg25147158	0.967	0.00554012	2.94427	-3.4667	0.0684	4	165898707		TRIM61				165898707	165898830	1stExon
cg27064063	0.967	0.00559518	2.94049	-3.4759	0.0572	6	117869287		DCBLD1	chr6:117869097-117869530		TRUE	117869287	117869410	Body
cg08146256	0.967	0.0056381	2.93756	-3.483	0.0552	14	21734410		HNRNPC	chr14:21737406-21738094			21734410	21734533	5'UTR
cg17990398	0.967	0.00565086	2.93669	-3.4851	0.0627	10	133928873	rs73397603	JAKMIP3	chr10:133930595-133931010			133928873	133928996	Body
cg04149172	0.967	0.00570499	-2.93304	-3.4941	-0.0744	20	34000170		UQCC				34000170	34000293	TSS1500
cg09050820	0.967	0.00578984	-2.92738	-3.5078	-0.116	6	167586206		TCP10L2	chr6:167587354-167587559			167586206	167586329	Body
cg01617071	0.967	0.00581057	2.92601	-3.5112	0.061	7	964629		ADAP1	chr7:965987-966266			964629	964752	Body
cg12717203	0.967	0.00587393	-2.92185	-3.5213	-0.0952	4	124342		ZNF718	chr4:124332-124841			124342	124465	Body
cg05978707	0.967	0.00595721	2.91644	-3.5345	0.0522	2	1204376		SNTG2				1204376	1204499	Body
cg00614360	0.967	0.00599177	2.91422	-3.5399	0.0615	17	80858406		TBCD	chr17:80856874-80857352		TRUE	80858406	80858529	Body
cg27455017	0.967	0.0061073	-2.90687	-3.5577	-0.0607	7	150037988		RARRES2	chr7:150037459-150039031		TRUE	150037988	150038111	5'UTR
cg04137702	0.967	0.0061305	-2.90541	-3.5612	-0.0529	10	50886878		C10orf53	chr10:50887565-50887862			50886878	50887001	TSS1500
cg14704780	0.967	0.00614539	2.90448	-3.5635	0.0575	6	32305106		C6orf10				32305106	32305229	Body
cg13218688	0.967	0.00615831	2.90367	-3.5654	0.0507	18	72125544		FAM69C	chr18:72123606-72124717			72125544	72125667	TSS1500
cg15554694	0.967	0.00620873	-2.90053	-3.573	-0.0705	X	86772364		KLHL4				86772364	86772487	TSS1500
cg14044669	0.967	0.00622815	-2.89933	-3.576	-0.25	6	32312351	rs7383143	C6orf10				32312351	32312474	Body
cg06425919	0.967	0.00626703	-2.89693	-3.5818	-0.0501	11	17741925		MYOD1	chr11:17740789-17743779			17741925	17742048	1stExon
cg00145419	0.967	0.00630684	2.89449	-3.5877	0.0638	13	110966036		COL4A2	chr13:110965774-110966223		TRUE	110966036	110966159	Body
cg04326808	0.967	0.00632737	-2.89324	-3.5907	-0.0508	15	39543043		C15orf54				39543043	39543166	1stExon
cg15940569	0.967	0.00633363	-2.89285	-3.5916	-0.059	15	27019356		GABRB3	chr15:27016892-27018943			27019356	27019479	TSS1500
cg18355337	0.967	0.0064039	-2.8886	-3.6019	-0.102	19	55549722	rs12608522	GP6				55549722	55549845	TSS200
cg22151446	0.967	0.00640923	-2.88828	-3.6027	-0.0517	5	140810805		PCDHGA4	chr5:140810494-140812617			140810805	140810928	Body
cg08458068	0.967	0.00645119	-2.88576	-3.6088	-0.0672	X	102532056		TCEAL5				102532056	102532179	TSS1500
cg17294865	0.967	0.00647282	-2.88446	-3.6119	-0.193	6	33050124	rs9277367	HLA-DPB1	chr6:33048416-33048814			33050124	33050247	Body
cg00509187	0.967	0.00653547	-2.88074	-3.6209	-0.0576	13	44362093		ENOX1	chr13:44359858-44361696	CDMR		44362093	44362216	TSS1500
cg13229487	0.967	0.00661652	2.87598	-3.6323	0.126	13	30166879	rs73154454	SLC7A1	chr13:30168901-30170246			30166879	30167002	5'UTR
cg14089503	0.967	0.00661709	2.87594	-3.6324	0.0679	8	37755555		RAB11FIP1	chr8:37756454-37757339			37755555	37755678	Body
cg15829423	0.967	0.0067235	2.86977	-3.6473	0.0553	11	68138862		LRP5				68138862	68138985	Body
cg01647917	0.967	0.00678146	-2.86644	-3.6553	-0.249	19	542653	rs3760878	GZMM	chr19:540021-542033			542653	542776	TSS1500
cg03955859	0.967	0.00679294	-2.86579	-3.6568	-0.0596	4	124155479		SPATA5			TRUE	124155479	124155602	Body
cg27552584	0.967	0.00693929	-2.85752	-3.6767	-0.0548	1	6228023		CHD5				6228023	6228146	Body
cg03610527	0.967	0.0070425	-2.85179	-3.6904	-0.0511	2	242174889		HDLBP				242174889	242175012	Body
cg00450015	0.967	0.00706377	2.85062	-3.6932	0.0647	2	120193766		TMEM37	chr2:120190030-120190308			120193766	120193889	Body
cg08040012	0.967	0.00708207	-2.84961	-3.6956	-0.0726	4	37247586		KIAA1239	chr4:37245250-37246979	RDMR		37247586	37247709	Body
cg08530036	0.967	0.00716216	2.84524	-3.7061	0.0715	1	19496406		UBR4			TRUE	19496406	19496529	Body
cg01417394	0.967	0.00718642	2.84393	-3.7092	0.0522	4	143324090	rs1982966	INPP4B			TRUE	143324090	143324213	Body
cg00995368	0.967	0.00719434	2.8435	-3.7103	0.0562	6	32627885		HLA-DQB1				32627885	32628008	3'UTR
cg16906346	0.967	0.0072519	-2.8404	-3.7177	-0.157	6	24646782		KIAA0319	chr6:24645931-24646591		TRUE	24646782	24646905	TSS1500
cg00482162	0.967	0.00728102	2.83884	-3.7214	0.0704	2	109896312		SH3RF3			TRUE	109896312	109896435	Body
cg16290737	0.967	0.00728212	2.83878	-3.7215	0.0522	14	93389246		CHGA	chr14:93389245-93389899			93389246	93389369	TSS200
cg17611936	0.967	0.00741292	2.83185	-3.7381	0.138	7	151411526		PRKAG2				151411526	151411649	Body
cg17542852	0.967	0.0074337	2.83076	-3.7407	0.051	1	152332651		FLG2				152332651	152332774	TSS200
cg03242819	0.967	0.00752134	-2.82619	-3.7516	-0.073	10	128994432		DOCK1	chr10:128993505-128995167	DMR		128994432	128994555	Body
cg10197305	0.967	0.00764201	-2.81997	-3.7664	-0.0961	4	125112		ZNF718	chr4:124332-124841	DMR		125112	125235	Body
cg26853458	0.967	0.00768265	2.8179	-3.7713	0.0503	17	9805074		RCVRN	chr17:9808067-9808339			9805074	9805197	Body
cg27581031	0.967	0.00778832	2.81256	-3.784	0.0501	17	48348565		TMEM92	chr17:48350422-48350832		TRUE	48348565	48348688	TSS1500
cg22778903	0.967	0.00790871	2.80656	-3.7982	0.0607	21	42741698		MX2			TRUE	42741698	42741821	5'UTR
cg25648203	0.967	0.00794377	2.80483	-3.8023	0.0514	5	395444		AHRR			TRUE	395444	395567	Body
cg07319199	0.967	0.00796632	2.80372	-3.8049	0.142	2	69273285		ANTXR1			TRUE	69273285	69273408	Body
cg25030262	0.967	0.00800773	-2.80169	-3.8097	-0.0654	15	25092069		SNRPN	chr15:25093191-25093582		TRUE	25092069	25092192	5'UTR
cg04748637	0.967	0.00815118	2.79473	-3.8262	0.0626	4	111397885		ENPEP	chr4:111397677-111398089			111397885	111398008	1stExon
cg25288140	0.967	0.00815286	-2.79896	-3.8093	-0.091	17	41278341		BRCA1	chr17:41278134-41278460			41278341	41278464	TSS1500
cg14733637	0.967	0.00815575	2.79451	-3.8267	0.0575	5	1342200		CLPTM1L	chr5:1344545-1345469			1342200	1342323	Body
cg16942632	0.967	0.00823192	-2.79086	-3.8353	-0.0766	12	121726240		CAMKK2			TRUE	121726240	121726363	5'UTR
cg16348003	0.967	0.00825463	2.78978	-3.8379	0.051	1	153589781		S100A14				153589781	153589904	TSS1500
cg03957898	0.967	0.00825876	2.78958	-3.8384	0.0784	1	152333423		FLG2				152333423	152333546	TSS1500
cg19377607	0.967	0.00831883	-2.78674	-3.8451	-0.252	10	72138124		LRRC20	chr10:72141560-72142637			72138124	72138247	5'UTR
cg20430773	0.967	0.00842347	-2.78183	-3.8567	-0.0666	1	16534157		ARHGEF19	chr1:16532917-16534580			16534157	16534280	Body
cg08146323	0.967	0.00847826	-2.77928	-3.8627	-0.0504	19	57183118		ZNF835	chr19:57182887-57183375			57183118	57183241	Body
cg07673230	0.967	0.00848295	-2.77906	-3.8632	-0.0564	8	98789233		LAPTM4B	chr8:98787835-98788874	RDMR		98789233	98789356	Body
cg23333490	0.967	0.00849636	-2.77844	-3.8647	-0.166	6	33050741		HLA-DPB1	chr6:33048416-33048814			33050741	33050864	Body
cg20694666	0.967	0.00851248	2.77769	-3.8664	0.0626	13	21343614	rs78486804	N6AMT2	chr13:21347443-21348257			21343614	21343737	5'UTR
cg08477332	0.967	0.00852697	2.77702	-3.868	0.17	1	153590243		S100A14				153590243	153590366	TSS1500
cg00658082	0.967	0.00853227	-2.77678	-3.8686	-0.0555	2	74669380		RTKN	chr2:74667593-74669403			74669380	74669503	TSS1500
cg02978220	0.967	0.00853887	2.77647	-3.8693	0.104	1	108337960		VAV3			TRUE	108337960	108338083	Body
cg27080348	0.967	0.00856189	-2.77541	-3.8718	-0.0524	5	140182129		PCDHA2	chr5:140181888-140183014			140182129	140182252	Body
cg26029734	0.967	0.00871704	-2.76834	-3.8884	-0.0523	11	31819380		PAX6	chr11:31820060-31821416			31819380	31819503	Body
cg14197156	0.967	0.00877205	2.76586	-3.8942	0.0588	9	139565151	rs7846878	EGFL7	chr9:139564999-139565286			139565151	139565274	Body
cg14900909	0.967	0.00880185	-2.76452	-3.8974	-0.167	4	7735312	rs2285774	SORCS2				7735312	7735435	Body
cg05113410	0.967	0.00882778	2.76336	-3.9001	0.0566	2	102327511		MAP4K4			TRUE	102327511	102327634	Body
cg27017357	0.967	0.00888721	2.76072	-3.9063	0.0537	19	4983983	rs11880607	KDM4B	chr19:4986182-4986405			4983983	4984106	5'UTR
cg20981163	0.967	0.00889063	-2.76056	-3.9067	-0.199	6	33049983	rs9277358	HLA-DPB1	chr6:33048416-33048814			33049983	33050106	Body
cg00937175	0.967	0.00889088	2.76055	-3.9067	0.0585	21	46850594		COL18A1	chr21:46850573-46850841		TRUE	46850594	46850717	Body
cg21167985	0.967	0.00891514	-2.75948	-3.9092	-0.0541	13	113540421	rs3742238	ATP11A	chr13:113540350-113540558		TRUE	113540421	113540544	3'UTR
cg18781988	0.967	0.00902323	-2.75472	-3.9203	-0.0518	5	140723549		PCDHGA2	chr5:140723548-140723900			140723549	140723672	Body
cg22252999	0.967	0.00921211	-2.74653	-3.9395	-0.0583	4	76996414		ART3				76996414	76996537	5'UTR
cg03736807	0.967	0.00925891	-2.74452	-3.9442	-0.0526	12	54654045		CBX5				54654045	54654168	TSS1500
cg15897435	0.967	0.00928581	-2.74338	-3.9469	-0.229	4	78852682	rs6533344	MRPL1			TRUE	78852682	78852805	Body
cg00670721	0.967	0.00932509	2.7417	-3.9508	0.081	3	186504202		SNORA63	chr3:186500738-186502048			186504202	186504325	TSS1500
cg00027155	0.967	0.00932805	2.74158	-3.9511	0.129	16	11099199	rs60223258	CLEC16A			TRUE	11099199	11099322	Body
cg15075988	0.967	0.00933325	-2.74136	-3.9516	-0.0841	10	76974078		VDAC2	chr10:76969992-76971002			76974078	76974201	Body
cg19383211	0.967	0.00944333	2.73671	-3.9624	0.121	6	32527588		HLA-DRB6				32527588	32527711	Body
cg02771117	0.967	0.00945908	2.73605	-3.964	0.064	8	11279352		FAM167A				11279352	11279475	3'UTR
cg01551315	0.967	0.00950135	2.73428	-3.9681	0.0645	5	156486422		HAVCR1				156486422	156486545	TSS1500
cg03730622	0.967	0.00954989	2.73226	-3.9728	0.0559	22	46760678		CELSR1	chr22:46760450-46760679			46760678	46760801	Body
cg13845521	0.967	0.00962881	-2.729	-3.9804	-0.0542	Y	21238886		TTTY14	chrY:21238448-21240005			21238886	21239009	Body
cg02931225	0.967	0.00970885	2.72571	-3.988	0.0625	4	96446177		UNC5C				96446177	96446300	Body
cg01355753	0.967	0.00973285	-2.72473	-3.9903	-0.051	16	30457524		SEPHS2	chr16:30456730-30457071			30457524	30457647	TSS1500
cg22292345	0.967	0.00973666	-2.72457	-3.9907	-0.0525	3	47051533		LOC100129354	chr3:47050486-47051609		TRUE	47051533	47051656	TSS1500
cg25804044	0.967	0.00975365	-2.72388	-3.9923	-0.0518	6	31870970		ZBTB12	chr6:31868781-31870311			31870970	31871093	TSS1500
cg04339360	0.967	0.00977244	-2.72312	-3.9941	-0.062	13	73635568		KLF5	chr13:73632860-73634370	CDMR		73635568	73635691	Body
cg25283336	0.967	0.00979258	-2.7223	-3.996	-0.0669	6	33033484	rs67640541	HLA-DPA1				33033484	33033607	3'UTR
cg02848875	0.967	0.00979442	2.72222	-3.9961	0.0939	15	64387786		SNX1	chr15:64387985-64388628			64387786	64387909	TSS1500
cg12599850	0.967	0.00989223	-2.71827	-4.0053	-0.0602	1	95006451		F3	chr1:95006837-95008051	RDMR		95006451	95006574	Body
cg12180191	0.967	0.00998178	-2.71469	-4.0136	-0.0517	8	41686706		ANK1	chr8:41685748-41686674		TRUE	41686706	41686829	Body
cg17719053	0.967	0.0100424	-2.71228	-4.0192	-0.0553	1	75198211		TYW3				75198211	75198334	TSS1500
cg15827779	0.967	0.0100949	-2.7102	-4.024	-0.0664	14	103524899		CDC42BPB	chr14:103522988-103524431			103524899	103525022	TSS1500
cg03152428	0.967	0.0102095	2.7057	-4.0344	0.0592	21	46850691		COL18A1	chr21:46850573-46850841		TRUE	46850691	46850814	Body
cg12062672	0.967	0.0103286	2.70108	-4.0451	0.0583	19	643555		FGF22	chr19:643092-643720			643555	643678	Body
cg22212250	0.967	0.0104292	2.69721	-4.0541	0.0656	5	132232586		AFF4				132232586	132232709	Body
cg12932306	0.967	0.0104407	2.69677	-4.0551	0.0572	11	94564754		AMOTL1			TRUE	94564754	94564877	Body
cg04228083	0.967	0.0105345	2.6932	-4.0633	0.0616	4	1202657		LOC100130872-SPON2	chr4:1202956-1203200			1202657	1202780	TSS200
cg02405213	0.967	0.0106508	2.68881	-4.0735	0.12	9	5042618	rs74285178	JAK2	chr9:5042797-5043270			5042618	5042741	Body
cg07938642	0.967	0.0107593	2.68475	-4.0828	0.0512	19	18338579		PDE4C	chr19:18335072-18337375			18338579	18338702	TSS1500
cg01823925	0.967	0.0107662	2.6845	-4.0834	0.0536	5	156967901		ADAM19			TRUE	156967901	156968024	Body
cg07079231	0.967	0.0107683	-2.68442	-4.0836	-0.0546	16	21169331		DNAH3	chr16:21169810-21170278			21169331	21169454	Body
cg17482089	0.967	0.0107739	-2.68421	-4.084	-0.0528	5	140250432		PCDHA6	chr5:140249734-140250949			140250432	140250555	Body
cg06881898	0.967	0.0107957	-2.6834	-4.0859	-0.0651	1	95006539		F3	chr1:95006837-95008051	RDMR		95006539	95006662	Body
cg23828763	0.967	0.0108039	-2.6831	-4.0866	-0.0565	10	123873748		TACC2	chr10:123872119-123873462			123873748	123873871	Body
cg15428479	0.967	0.0108307	-2.68211	-4.0889	-0.0676	19	18698825		C19orf60	chr19:18699422-18700554			18698825	18698948	TSS1500
cg13115222	0.967	0.0108364	-2.6819	-4.0894	-0.057	1	203670963		ATP2B4			TRUE	203670963	203671086	Body
cg25817701	0.967	0.0109352	2.67826	-4.0977	0.0652	7	2140143		MAD1L1				2140143	2140266	Body
cg01233934	0.967	0.0109563	-2.67749	-4.0995	-0.0634	6	100059961		PRDM13	chr6:100060979-100062657	RDMR		100059961	100060084	Body
cg07825433	0.967	0.0110054	2.6757	-4.1036	0.0773	4	1215099		CTBP1	chr4:1218943-1219718			1215099	1215222	Body
cg13356896	0.967	0.0110121	-2.67545	-4.1042	-0.0522	2	198650987		BOLL	chr2:198649751-198651599	DMR		198650987	198651110	TSS200
cg15290312	0.967	0.0110774	-2.67308	-4.1096	-0.268	17	76897139	rs4789864	TIMP2	chr17:76897078-76897298			76897139	76897262	Body
cg15486454	0.967	0.0110943	2.67247	-4.111	0.0508	3	133191270		BFSP2				133191270	133191393	Body
cg00897703	0.967	0.0112895	2.66547	-4.1271	0.0539	2	135434956		TMEM163			TRUE	135434956	135435079	Body
cg21005438	0.967	0.0114405	2.66013	-4.1393	0.0502	1	15541182		TMEM51	chr1:15541181-15541447			15541182	15541305	5'UTR
cg04134748	0.967	0.0115195	-2.65736	-4.1456	-0.0525	1	3052175		PRDM16				3052175	3052298	Body
cg23499749	0.967	0.0115476	-2.65639	-4.1479	-0.0556	2	113345365		CHCHD5	chr2:113341684-113342453			113345365	113345488	Body
cg02505177	0.967	0.0116422	2.6531	-4.1554	0.0503	10	103574626		MGEA5	chr10:103577394-103578256			103574626	103574749	Body
cg11649795	0.967	0.0116615	-2.65243	-4.1569	-0.0545	11	109295491		C11orf87	chr11:109293519-109294983	RDMR		109295491	109295614	3'UTR
cg11205981	0.967	0.0118296	-2.64667	-4.17	-0.073	8	144790410		LOC100130274	chr8:144788491-144791059			144790410	144790533	TSS200
cg23563927	0.967	0.0118357	-2.64646	-4.1705	-0.0513	10	134755679		C10orf93	chr10:134755663-134756852		TRUE	134755679	134755802	Body
cg02638458	0.967	0.0118422	-2.64624	-4.171	-0.0521	7	155301811		CNPY1	chr7:155302253-155303158			155301811	155301934	5'UTR
cg12188416	0.967	0.0119008	2.64425	-4.1756	0.0707	3	189349003		TP63				189349003	189349126	TSS1500
cg09096555	0.967	0.0119111	-2.6439	-4.1764	-0.0507	17	72848358		GRIN2C	chr17:72848166-72848901		TRUE	72848358	72848481	Body
cg09088988	0.967	0.0120072	-2.64066	-4.1837	-0.0554	5	146614298		STK32A	chr5:146614283-146614560	DMR		146614298	146614421	TSS1500
cg00585072	0.967	0.0120514	-2.63917	-4.1871	-0.0502	5	140186983	rs3822352	PCDHA2	chr5:140186792-140187268			140186983	140187106	Body
cg24779941	0.967	0.0122603	-2.63223	-4.2029	-0.0701	14	103524901		CDC42BPB	chr14:103522988-103524431			103524901	103525024	TSS1500
cg15383633	0.967	0.012269	-2.63195	-4.2035	-0.0548	X	21674175		KLHL34	chrX:21674018-21677066			21674175	21674298	1stExon
cg00139496	0.967	0.0122849	2.63142	-4.2047	0.0501	3	52731124		GLT8D1				52731124	52731247	Body
cg18640030	0.967	0.0123344	-2.6298	-4.2084	-0.0633	8	67090752		CRH	chr8:67089249-67089962			67090752	67090875	TSS200
cg15215348	0.967	0.0123457	-2.62943	-4.2093	-0.0673	19	18344520		PDE4C	chr19:18343496-18344196			18344520	18344643	5'UTR
cg15912800	0.967	0.0124045	-2.6275	-4.2136	-0.0611	7	27209197		MIR196B	chr7:27208871-27209616			27209197	27209320	TSS200
cg08605301	0.967	0.0124129	-2.62723	-4.2142	-0.058	7	29924135		WIPF3	chr7:29923882-29924264			29924135	29924258	Body
cg25771854	0.967	0.0124401	-2.62634	-4.2163	-0.183	1	247420421	rs41308154	VN1R5				247420421	247420544	1stExon
cg05364567	0.967	0.0125135	-2.62396	-4.2216	-0.0511	17	5019761		ZNF232	chr17:5019637-5019879			5019761	5019884	5'UTR
cg26723237	0.967	0.0125196	2.62377	-4.2221	0.0515	15	65643176		IGDCC3				65643176	65643299	Body
cg10462778	0.967	0.0125242	-2.62362	-4.2224	-0.0693	5	172314133		ERGIC1			TRUE	172314133	172314256	Body
cg25522867	0.967	0.0126454	2.61972	-4.2313	0.0509	11	34236648		ABTB2			TRUE	34236648	34236771	Body
cg23892856	0.967	0.0126591	2.61928	-4.2323	0.0672	1	116311644		CASQ2				116311644	116311767	TSS1500
cg13692972	0.967	0.0126601	-2.61924	-4.2323	-0.0704	11	63753020		OTUB1	chr11:63753414-63754454			63753020	63753143	TSS1500
cg13661648	0.967	0.0126874	-2.61837	-4.2343	-0.0966	6	33035284		HLA-DPA1				33035284	33035407	3'UTR
cg02322653	0.967	0.0127199	2.61734	-4.2367	0.0585	19	9296688		OR7D2				9296688	9296811	1stExon
cg17479280	0.967	0.0127788	2.61546	-4.2409	0.0518	1	156466088		MEF2D	chr1:156469617-156471060	RDMR	TRUE	156466088	156466211	5'UTR
cg08253808	0.967	0.0128574	-2.61298	-4.2465	-0.0823	14	102676957		WDR20	chr14:102680287-102680519		TRUE	102676957	102677080	Body
cg10044575	0.967	0.0128584	-2.61294	-4.2466	-0.0526	16	1208828		CACNA1H	chr16:1209939-1210945	DMR		1208828	1208951	Body
cg05348875	0.967	0.0128963	2.61175	-4.2493	0.0673	2	206628625		NRP2		CDMR	TRUE	206628625	206628748	Body
cg26090072	0.967	0.0129605	-2.60973	-4.2538	-0.0577	2	74669387		RTKN	chr2:74667593-74669403			74669387	74669510	TSS1500
cg08583859	0.967	0.0130174	2.60796	-4.2578	0.0553	20	61044849		GATA5	chr20:61041273-61041723			61044849	61044972	Body
cg07353620	0.967	0.0130236	2.60776	-4.2583	0.108	19	4770564	rs11669473	C19orf30				4770564	4770687	Body
cg03215181	0.967	0.0130427	-2.60717	-4.2596	-0.0534	4	122873487		TRPC3	chr4:122871412-122873182			122873487	122873610	TSS1500
cg16691177	0.967	0.013057	2.60672	-4.2606	0.0584	4	165898666		TRIM61				165898666	165898789	5'UTR
cg01988325	0.967	0.0131161	-2.60489	-4.2648	-0.0659	5	54467378		MIR449B	chr5:54468783-54469324			54467378	54467501	TSS1500
cg15443732	0.967	0.0132115	-2.60194	-4.2714	-0.0603	18	74961078		GALR1	chr18:74961556-74963822	CDMR		74961078	74961201	TSS1500
cg19601530	0.967	0.0132624	-2.60038	-4.2749	-0.111	4	7788250	rs55689818	AFAP1				7788250	7788373	Body
cg20320494	0.967	0.0132668	-2.60024	-4.2752	-0.0692	4	124232		ZNF718	chr4:124332-124841			124232	124355	Body
cg17161520	0.967	0.013348	2.59776	-4.2808	0.0623	11	67174843		TBC1D10C	chr11:67176945-67177169			67174843	67174966	Body
cg11760500	0.967	0.0133515	2.59765	-4.2811	0.063	11	128385880	rs76301752	ETS1			TRUE	128385880	128386003	Body
cg15966610	0.967	0.0133758	-2.59691	-4.2827	-0.0519	8	79718206		IL7	chr8:79716681-79717403	RDMR		79718206	79718329	TSS1500
cg01300684	0.967	0.0134043	2.59605	-4.2847	0.0642	4	141230118		SCOC			TRUE	141230118	141230241	5'UTR
cg00421624	0.967	0.0135499	-2.59165	-4.2946	-0.053	1	153746588		SLC27A3	chr1:153747655-153748698			153746588	153746711	TSS1500
cg14157435	0.967	0.0137516	2.58562	-4.3081	0.0774	2	206628692		NRP2		CDMR	TRUE	206628692	206628815	Body
cg04118119	0.967	0.0137777	-2.58485	-4.3098	-0.0539	13	47371987		ESD	chr13:47370763-47371484			47371987	47372110	TSS1500
cg08004073	0.967	0.0138161	-2.58371	-4.3124	-0.0617	3	169377725	rs34082453	MECOM	chr3:169379437-169381056	RDMR		169377725	169377848	Body
cg24900425	0.967	0.0138791	-2.58186	-4.3165	-0.0517	17	41278444		BRCA1	chr17:41278134-41278460			41278444	41278567	TSS1500
cg01480771	0.967	0.0138806	2.58181	-4.3166	0.092	19	51415170		KLK4	chr19:51416002-51416249			51415170	51415293	TSS1500
cg12134633	0.967	0.0139302	-2.58036	-4.3199	-0.0749	15	32934004		SCG5		DMR	TRUE	32934004	32934127	5'UTR
cg10631373	0.967	0.0140249	2.57759	-4.3261	0.0715	1	89457642		RBMXL1	chr1:89458034-89458604			89457642	89457765	5'UTR
cg05308792	0.967	0.0140324	2.57737	-4.3266	0.0612	16	1578807		IFT140	chr16:1574515-1574986			1578807	1578930	Body
cg00167913	0.967	0.0140834	2.57589	-4.3299	0.147	1	3446295	rs35026651	MEGF6	chr1:3447449-3447950			3446295	3446418	Body
cg24207698	0.967	0.0141672	-2.57346	-4.3353	-0.0617	2	166811308		TTC21B	chr2:166809970-166810826			166811308	166811431	TSS1500
cg03318924	0.967	0.0142883	-2.56998	-4.3431	-0.0558	12	49728150		C1QL4	chr12:49729728-49731162			49728150	49728273	Body
cg03810198	0.967	0.014295	2.56979	-4.3435	0.154	17	74679597	rs9892163	MXRA7			TRUE	74679597	74679720	Body
cg14481208	0.967	0.0143374	-2.56858	-4.3462	-0.071	2	74669375		RTKN	chr2:74667593-74669403			74669375	74669498	TSS1500
cg03036047	0.967	0.014338	-2.56856	-4.3463	-0.0609	6	32362744	rs28362677	BTNL2				32362744	32362867	Body
cg04970287	0.967	0.0143455	-2.56834	-4.3468	-0.114	6	32362638		BTNL2				32362638	32362761	Body
cg20649298	0.967	0.0144949	-2.5641	-4.3562	-0.0672	20	22545407		C20orf56	chr20:22548967-22549720		TRUE	22545407	22545530	Body
cg01218414	0.967	0.0145094	-2.56712	-4.3405	-0.0633	7	5937486		C7orf28A	chr7:5938173-5938557			5937486	5937609	TSS1500
cg21543081	0.967	0.0145361	2.56294	-4.3588	0.0683	6	32632106	rs71542461	HLA-DQB1	chr6:32632158-32633027			32632106	32632229	Body
cg06330797	0.967	0.0145369	2.56292	-4.3589	0.163	6	167195910		RPS6KA2	chr6:167197445-167197715			167195910	167196033	Body
cg05725940	0.967	0.0145762	2.56181	-4.3613	0.0555	17	38074925		GSDMB				38074925	38075048	TSS1500
cg14101976	0.967	0.0145775	2.56177	-4.3614	0.0591	4	96445972		UNC5C				96445972	96446095	Body
cg15811371	0.967	0.0146236	2.56048	-4.3643	0.0583	19	9093198		MUC16				9093198	9093321	TSS1500
cg12474013	0.967	0.0146324	2.56023	-4.3649	0.0779	6	33095865	rs28361072	HLA-DPB2				33095865	33095988	Body
cg24496021	0.967	0.0146933	-2.55853	-4.3687	-0.0743	11	72662461		FCHSD2			TRUE	72662461	72662584	Body
cg21248060	0.967	0.0147741	2.55628	-4.3737	0.0531	7	1039957		C7orf50	chr7:1039874-1040096			1039957	1040080	Body
cg21579107	0.967	0.0148551	-2.55404	-4.3787	-0.0575	12	49783192		SPATS2	chr12:49782965-49783193			49783192	49783315	5'UTR
cg11478766	0.967	0.0149011	2.55276	-4.3815	0.0697	6	32305990	rs79941607	C6orf10				32305990	32306113	Body
cg08475953	0.967	0.0149613	-2.55111	-4.3852	-0.0519	5	178004091		COL23A1	chr5:178003623-178004247			178004091	178004214	Body
cg20959189	0.967	0.0149889	2.55035	-4.3868	0.0522	3	141122632		ZBTB38	chr3:141120983-141121678	CDMR		141122632	141122755	5'UTR
cg17210938	0.967	0.0150691	-2.54816	-4.3917	-0.0601	1	59043173		TACSTD2	chr1:59042013-59043295		TRUE	59043173	59043296	TSS200
cg21383687	0.967	0.0150791	2.54789	-4.3923	0.0687	1	3045052		PRDM16				3045052	3045175	Body
cg17804886	0.967	0.0151234	2.54668	-4.395	0.0624	13	114871422		RASA3	chr13:114868894-114869836			114871422	114871545	Body
cg25385940	0.967	0.0152686	-2.54275	-4.4037	-0.0747	15	99789637		TTC23	chr15:99791328-99792042			99789637	99789760	1stExon
cg10429523	0.967	0.0152898	2.54218	-4.405	0.0516	6	125239911		STL				125239911	125240034	Body
cg09819502	0.967	0.0152995	-2.54192	-4.4056	-0.104	5	36242508	rs67585810	C5orf33	chr5:36241003-36242664			36242508	36242631	TSS1500
cg08886301	0.967	0.0153157	2.54148	-4.4065	0.0529	1	245710401		KIF26B			TRUE	245710401	245710524	Body
cg22840076	0.967	0.0153247	-2.54124	-4.4071	-0.0584	19	41782156		HNRNPUL1				41782156	41782279	Body
cg23189410	0.967	0.0153823	-2.5397	-4.4105	-0.0548	3	147125712		ZIC4	chr3:147126988-147128999	RDMR	TRUE	147125712	147125835	TSS1500
cg21249371	0.967	0.0153963	-2.53932	-4.4113	-0.0611	12	122019117		KDM2B	chr12:122016170-122017693	RDMR		122019117	122019240	TSS200
cg08484560	0.967	0.015406	-2.53906	-4.4119	-0.0842	13	113413587		ATP11A	chr13:113410004-113410362			113413587	113413710	Body
cg12551908	0.967	0.0154154	-2.53881	-4.4124	-0.189	7	66785137	rs9443	STAG3L4				66785137	66785260	3'UTR
cg21491706	0.967	0.0154426	2.53809	-4.414	0.0679	5	178702842		ADAMTS2			TRUE	178702842	178702965	Body
cg00313685	0.967	0.0155177	-2.53609	-4.4185	-0.0507	7	101468882		CUX1				101468882	101469005	Body
cg19093689	0.967	0.0155342	-2.53565	-4.4194	-0.0601	12	49783097		SPATS2	chr12:49782965-49783193			49783097	49783220	5'UTR
cg01970383	0.967	0.0155757	2.53455	-4.4219	0.0574	5	177729224	rs71594787	COL23A1	chr5:177729223-177729466			177729224	177729347	Body
cg19429281	0.967	0.0157082	-2.53106	-4.4296	-0.0639	19	53496738		ZNF702P	chr19:53496732-53497028	DMR		53496738	53496861	Body
cg21957905	0.967	0.0157305	-2.53047	-4.4309	-0.0895	4	7637501	rs79126181	SORCS2				7637501	7637624	Body
cg09343819	0.967	0.0157498	2.53328	-4.4154	0.0668	19	9202847	rs12461971	OR1M1	chr19:9204246-9204490			9202847	9202970	TSS1500
cg21656205	0.967	0.0157566	-2.52979	-4.4324	-0.0554	20	43439688		RIMS4	chr20:43438737-43439546			43439688	43439811	TSS1500
cg20063407	0.967	0.0157981	2.5287	-4.4348	0.0672	X	103220551		MIR1256	chrX:103217140-103217713			103220551	103220674	Body
cg23112672	0.967	0.0158431	-2.52753	-4.4374	-0.0631	1	876199		SAMD11	chr1:875730-878363			876199	876322	Body
cg00259046	0.967	0.0158444	2.52749	-4.4375	0.0565	11	50257771	rs10794225	LOC441601	chr11:50257255-50257772			50257771	50257894	TSS200
cg09918751	0.967	0.0159773	-2.52405	-4.4451	-0.0562	15	100517450		ADAMTS17				100517450	100517573	Body
cg16490124	0.967	0.0160206	2.52293	-4.4475	0.252	1	235292369	rs17523127	SNORA14B	chr1:235291740-235292387			235292369	235292492	TSS1500
cg14933468	0.967	0.0160316	-2.52264	-4.4482	-0.0623	11	62138599		ASRGL1	chr11:62138621-62138873			62138599	62138722	Body
cg07493874	0.967	0.0160494	2.52218	-4.4492	0.0886	5	1342172		CLPTM1L	chr5:1344545-1345469			1342172	1342295	Body
cg25958766	0.967	0.0160766	2.52149	-4.4507	0.0673	20	5485268		LOC149837				5485268	5485391	TSS200
cg15609734	0.967	0.0162805	-2.51627	-4.4622	-0.0778	10	17689470	rs72780792	STAM	chr10:17686097-17686335			17689470	17689593	Body
cg05918002	0.967	0.0163093	-2.51554	-4.4638	-0.0518	17	5019452		ZNF232	chr17:5019050-5019551			5019452	5019575	5'UTR
cg07805029	0.967	0.0163411	-2.51474	-4.4656	-0.0501	1	92953256		GFI1	chr1:92945907-92952609			92953256	92953379	TSS1500
cg14117320	0.967	0.0163647	-2.51414	-4.4669	-0.273	11	17032483	rs10741722	PLEKHA7	chr11:17034843-17036404			17032483	17032606	Body
cg09535475	0.967	0.0164635	-2.51165	-4.4724	-0.0651	2	42444827		EML4			TRUE	42444827	42444950	Body
cg06574716	0.967	0.0164651	-2.51161	-4.4725	-0.0533	19	44331239		ZNF283		RDMR		44331239	44331362	TSS1500
cg24146100	0.967	0.0164654	-2.5116	-4.4725	-0.0513	13	99737448		DOCK9	chr13:99738331-99740225	RDMR		99737448	99737571	Body
cg05681757	0.967	0.0166974	-2.5058	-4.4852	-0.0525	12	32655034	rs79370524	FGD4				32655034	32655157	TSS200
cg23876203	0.967	0.0167117	-2.50545	-4.486	-0.0888	7	27159889		HOXA3	chr7:27162087-27162426			27159889	27160012	5'UTR
cg14315912	0.967	0.0167878	-2.50356	-4.4901	-0.0618	14	102677294		WDR20	chr14:102680287-102680519		TRUE	102677294	102677417	Body
cg09889532	0.967	0.0168318	-2.50248	-4.4925	-0.0631	X	154564511		CLIC2				154564511	154564634	TSS1500
cg16769152	0.967	0.0168519	-2.50198	-4.4936	-0.0516	11	77734206		KCTD14				77734206	77734329	1stExon
cg04843821	0.967	0.0168529	-2.50195	-4.4936	-0.131	10	33016632		C10orf68				33016632	33016755	Body
cg12928933	0.967	0.0168755	2.5014	-4.4949	0.147	3	57680278	rs17744435	FAM116A	chr3:57678339-57678938			57680278	57680401	TSS1500
cg08630881	0.967	0.0169102	-2.50055	-4.4967	-0.102	X	70713213		BCYRN1	chrX:70712049-70712821			70713213	70713336	Body
cg15765817	0.967	0.0169119	2.50051	-4.4968	0.0505	11	78614359		ODZ4	chr11:78614205-78614597			78614359	78614482	Body
cg05389922	0.967	0.0169772	-2.49891	-4.5003	-0.0505	20	34000172		UQCC				34000172	34000295	TSS1500
cg03318906	0.967	0.0169948	2.49848	-4.5013	0.0554	8	37755254		RAB11FIP1	chr8:37756454-37757339	RDMR		37755254	37755377	Body
cg03287299	0.967	0.0170081	2.49815	-4.502	0.0605	20	5485245		LOC149837				5485245	5485368	TSS200
cg17170839	0.967	0.0171198	2.49543	-4.5079	0.0694	4	176733409		GPM6A			TRUE	176733409	176733532	1stExon
cg07369988	0.967	0.0172569	2.49212	-4.5152	0.051	21	43174782	rs35430923	RIPK4	chr21:43176662-43176894			43174782	43174905	Body
cg24304617	0.967	0.0172961	-2.49117	-4.5172	-0.061	1	169079632		ATP1B1	chr1:169074766-169076411			169079632	169079755	Body
cg17471720	0.967	0.0173434	2.49004	-4.5197	0.0685	X	9677410		TBL1X				9677410	9677533	Body
cg04352288	0.967	0.0174027	2.48861	-4.5228	0.0533	16	87958407		CA5A			TRUE	87958407	87958530	Body
cg20994022	0.967	0.0175905	2.48415	-4.5326	0.0696	17	7197813		YBX2	chr17:7197431-7198417			7197813	7197936	1stExon
cg01120173	0.967	0.0177313	-2.48082	-4.5398	-0.0595	17	5019669		ZNF232	chr17:5019637-5019879			5019669	5019792	5'UTR
cg10098373	0.967	0.017808	2.47902	-4.5437	0.0973	11	68550390		CPT1A	chr11:68550231-68550593			68550390	68550513	Body
cg01843768	0.967	0.0178105	2.47897	-4.5439	0.0643	7	2078650		MAD1L1				2078650	2078773	Body
cg10458216	0.967	0.0178873	-2.47717	-4.5478	-0.0555	13	97873947		MBNL2				97873947	97874070	TSS1500
cg11619961	0.967	0.0178939	-2.47702	-4.5481	-0.0506	5	149792840		CD74				149792840	149792963	TSS1500
cg19164987	0.967	0.0179045	-2.47677	-4.5486	-0.067	12	54413000		HOXC4	chr12:54412990-54413346			54413000	54413123	5'UTR
cg21915313	0.967	0.0179074	-2.4767	-4.5488	-0.0587	5	140774426		PCDHGA4	chr5:140773855-140774441			140774426	140774549	Body
cg19123916	0.967	0.0179871	-2.47485	-4.5528	-0.0517	4	48484788		SLC10A4	chr4:48485362-48486473			48484788	48484911	TSS1500
cg14129329	0.967	0.0180272	2.47392	-4.5548	0.0545	9	136769545	rs10821536	VAV2			TRUE	136769545	136769668	Body
cg18387659	0.967	0.0180678	2.47298	-4.5569	0.0543	10	1276341		ADARB2			TRUE	1276341	1276464	Body
cg05385434	0.967	0.0181559	-2.47095	-4.5613	-0.0582	1	225998870		EPHX1	chr1:225997646-225998233		TRUE	225998870	225998993	5'UTR
cg23905789	0.967	0.0182711	2.46831	-4.567	0.239	6	32549935	rs35095850	HLA-DRB1	chr6:32551851-32552331			32549935	32550058	Body
cg13568515	0.967	0.0182774	2.46816	-4.5674	0.162	9	5040816		JAK2	chr9:5040734-5041922			5040816	5040939	Body
cg02797195	0.967	0.0183255	2.46706	-4.5697	0.0537	21	43185674		RIPK4	chr21:43186280-43187436	CDMR		43185674	43185797	Body
cg25940485	0.967	0.018383	2.46576	-4.5726	0.0542	1	117636616		MIR942			TRUE	117636616	117636739	TSS1500
cg12630461	0.967	0.0185064	-2.46296	-4.5786	-0.0714	15	91500009		RCCD1	chr15:91499952-91500818			91500009	91500132	Body
cg03127898	0.967	0.0185374	-2.46226	-4.5802	-0.0573	11	62455098		LRRN4CL	chr11:62455073-62455868			62455098	62455221	3'UTR
cg06484169	0.967	0.018631	-2.46015	-4.5847	-0.188	6	33052354	rs9277441	HLA-DPB1	chr6:33048416-33048814			33052354	33052477	Body
cg21265404	0.967	0.0187963	2.45645	-4.5927	0.11	9	90531866		FAM75C1				90531866	90531989	TSS1500
cg08330972	0.967	0.0188668	-2.45488	-4.5961	-0.0507	4	2403930		ZFYVE28	chr4:2401507-2401759		TRUE	2403930	2404053	Body
cg13124801	0.967	0.0190051	2.45182	-4.6028	0.0569	17	4439623		SPNS2	chr17:4439300-4439705		TRUE	4439623	4439746	Body
cg12161971	0.967	0.0190675	-2.45044	-4.6057	-0.0583	11	77907332		USP35	chr11:77907211-77908088			77907332	77907455	Body
cg22502715	0.967	0.0190861	2.45003	-4.6066	0.067	1	247171572		ZNF695	chr1:247170868-247171434			247171572	247171695	TSS1500
cg01778345	0.967	0.0191161	2.44937	-4.608	0.247	1	118427435	rs4659351	GDAP2			TRUE	118427435	118427558	Body
cg06800849	0.967	0.0191286	2.4491	-4.6086	0.0509	16	89180587		ACSF3			TRUE	89180587	89180710	Body
cg06682875	0.967	0.0191318	-2.44903	-4.6088	-0.0556	5	115150172		CDO1	chr5:115151348-115152713			115150172	115150295	Body
cg01898661	0.967	0.0191803	-2.44797	-4.6111	-0.051	16	90114063		LOC100130015			TRUE	90114063	90114186	TSS200
cg11820026	0.967	0.0191861	-2.44784	-4.6113	-0.0988	11	117696743		FXYD2				117696743	117696866	Body
cg25605313	0.967	0.0192442	-2.44657	-4.6141	-0.0686	19	17434267		ANO8	chr19:17438054-17440318			17434267	17434390	3'UTR
cg13023646	0.967	0.0193282	2.44474	-4.618	0.0785	4	165898835		TRIM61				165898835	165898958	TSS200
cg13325231	0.967	0.0193865	2.44348	-4.6207	0.0809	5	1342170		CLPTM1L	chr5:1344545-1345469			1342170	1342293	Body
cg17959722	0.967	0.0194175	2.44281	-4.6222	0.0721	9	140446823		MRPL41	chr9:140445653-140446891			140446823	140446946	Body
cg01358620	0.967	0.0194826	2.4414	-4.6252	0.0866	14	31858202		HEATR5A				31858202	31858325	TSS200
cg19319808	0.967	0.0195624	2.43968	-4.6289	0.0602	1	228870454		RHOU	chr1:228870810-228872297			228870454	228870577	TSS1500
cg20344388	0.967	0.0195908	2.43907	-4.6302	0.0716	21	46829943		COL18A1	chr21:46824531-46826234		TRUE	46829943	46830066	Body
cg11383208	0.967	0.0196839	2.43707	-4.6345	0.0577	22	46481948		LOC400931	chr22:46481815-46482024			46481948	46482071	Body
cg14768256	0.967	0.019719	-2.43632	-4.6361	-0.0627	3	44754587		ZNF502	chr3:44754099-44754399			44754587	44754710	5'UTR
cg05783139	0.967	0.0197909	-2.43479	-4.6394	-0.0524	2	198650985		BOLL	chr2:198649751-198651599	DMR		198650985	198651108	TSS200
cg21599230	0.967	0.0198435	-2.43368	-4.6418	-0.0539	4	118006619		TRAM1L1	chr4:118006538-118006859	DMR	TRUE	118006619	118006742	1stExon
cg21916461	0.967	0.0198781	2.43294	-4.6434	0.0657	11	68148079	rs58373012	LRP5			TRUE	68148079	68148202	Body
cg24004665	0.967	0.0199628	2.43115	-4.6473	0.0556	10	52176755		SGMS1	chr10:52177724-52178182		TRUE	52176755	52176878	5'UTR
cg05398700	0.967	0.0200115	-2.43012	-4.6495	-0.06	14	102677141		WDR20	chr14:102680287-102680519		TRUE	102677141	102677264	Body
cg02167149	0.967	0.0200767	2.42875	-4.6524	0.0531	8	10683167		MIR1322				10683167	10683290	TSS1500
cg16144436	0.967	0.0200801	-2.42868	-4.6526	-0.181	17	7645325	rs12938680	DNAH2	chr17:7643797-7644311			7645325	7645448	Body
cg02344477	0.967	0.0201738	2.42672	-4.6568	0.0769	3	155422971		PLCH1				155422971	155423094	TSS1500
cg12990219	0.967	0.0201955	2.42626	-4.6577	0.054	3	17686199		TBC1D5			TRUE	17686199	17686322	5'UTR
cg16018921	0.967	0.0202566	2.42499	-4.6605	0.0529	4	169616009		PALLD			TRUE	169616009	169616132	Body
cg00084577	0.967	0.0202649	-2.42482	-4.6608	-0.0512	16	30721139		SNORA30				30721139	30721262	TSS1500
cg15133351	0.967	0.0203103	-2.42387	-4.6629	-0.0572	2	176948732		EVX2	chr2:176949511-176949795	RDMR		176948732	176948855	TSS200
cg25869196	0.967	0.0203129	-2.42382	-4.663	-0.0558	2	102952419		IL1RL1				102952419	102952542	5'UTR
cg21426003	0.967	0.0203629	-2.42278	-4.6652	-0.0515	2	237076811		GBX2	chr2:237071794-237078762			237076811	237076934	TSS200
cg07889003	0.967	0.0204844	2.42027	-4.6706	0.148	6	32546614	rs3205684	HLA-DRB1				32546614	32546737	3'UTR
cg01532436	0.967	0.0205047	2.41985	-4.6715	0.0602	19	48983942		CYTH2	chr19:48983562-48984175		TRUE	48983942	48984065	3'UTR
cg03658236	0.967	0.0205554	-2.41881	-4.6737	-0.0509	12	104063640		STAB2			TRUE	104063640	104063763	Body
cg01790920	0.967	0.0206394	-2.41709	-4.6774	-0.0572	5	3594679	rs828336	IRX1	chr5:3594467-3603054			3594679	3594802	TSS1500
cg18276112	0.967	0.0206777	-2.4163	-4.6791	-0.0538	7	4755032		FOXK1	chr7:4757802-4758037		TRUE	4755032	4755155	Body
cg02932321	0.967	0.0206877	2.4161	-4.6795	0.0512	8	6783521		DEFA6				6783521	6783644	1stExon
cg11606877	0.967	0.0207107	2.41563	-4.6805	0.0894	6	32076592		TNXB			TRUE	32076592	32076715	5'UTR
cg15094236	0.967	0.0208293	-2.41321	-4.6857	-0.0613	6	1070389		LOC285768			TRUE	1070389	1070512	Body
cg26659797	0.967	0.0209496	2.41078	-4.6909	0.0642	1	172437907		C1orf105				172437907	172438030	3'UTR
cg17364114	0.967	0.0209568	-2.41063	-4.6912	-0.0524	6	160769359		SLC22A3	chr6:160768414-160770308		TRUE	160769359	160769482	TSS200
cg06418238	0.967	0.0209598	-2.41057	-4.6913	-0.0584	17	78755442		RPTOR				78755442	78755565	Body
cg21129729	0.967	0.0210015	-2.40973	-4.6931	-0.0659	2	42719678		KCNG3	chr2:42719784-42722166	RDMR		42719678	42719801	Body
cg10472919	0.967	0.0210369	-2.40902	-4.6946	-0.0511	5	135266805		FBXL21	chr5:135265848-135266517			135266805	135266928	5'UTR
cg04512966	0.967	0.0211076	-2.4076	-4.6977	-0.0537	2	162859453		DPP4			TRUE	162859453	162859576	Body
cg04535966	0.967	0.0212197	2.40535	-4.7024	0.0533	3	188034983		LPP			TRUE	188034983	188035106	5'UTR
cg05073382	0.967	0.0212302	2.40514	-4.7029	0.0903	8	2045798		MYOM2	chr8:2046691-2046963			2045798	2045921	Body
cg11809958	0.967	0.02153	-2.3992	-4.7155	-0.0598	12	32654929		FGD4				32654929	32655052	TSS200
cg20327444	0.967	0.021748	-2.39492	-4.7246	-0.0508	13	110959647	rs7989823	COL4A1	chr13:110958891-110960590	DMR		110959647	110959770	TSS200
cg22332589	0.967	0.0219754	2.3905	-4.734	0.0516	13	110966052	rs1308795	COL4A2	chr13:110965774-110966223		TRUE	110966052	110966175	Body
cg17161250	0.967	0.022013	-2.38977	-4.7356	-0.0547	2	106682209		C2orf40	chr2:106681982-106682403	DMR	TRUE	106682209	106682332	1stExon
cg16397968	0.967	0.0220702	2.38867	-4.7379	0.165	10	3164740		PFKP	chr10:3160888-3161107			3164740	3164863	Body
cg23754918	0.967	0.0221153	2.3878	-4.7397	0.0736	7	2653733		IQCE		RDMR	TRUE	2653733	2653856	3'UTR
cg26861995	0.967	0.0221677	2.3868	-4.7419	0.0512	3	127831673		RUVBL1			TRUE	127831673	127831796	Body
cg14324502	0.967	0.0221889	-2.38639	-4.7427	-0.0682	9	88898587		ISCA1	chr9:88896741-88897721			88898587	88898710	TSS1500
cg19995459	0.967	0.0221907	-2.38636	-4.7428	-0.0503	3	30647672		TGFBR2	chr3:30647987-30648881			30647672	30647795	TSS1500
cg07075347	0.967	0.0221944	-2.38629	-4.7429	-0.0742	7	44104860		PGAM2	chr7:44104746-44105116		TRUE	44104860	44104983	1stExon
cg10747531	0.967	0.0222544	-2.38514	-4.7454	-0.0665	17	38936092		KRT27	chr17:38935799-38936093			38936092	38936215	Body
cg26038582	0.967	0.0222927	-2.3844	-4.7469	-0.0699	1	42384390		HIVEP3	chr1:42383640-42384003		TRUE	42384390	42384513	1stExon
cg19290738	0.967	0.0223009	-2.38425	-4.7473	-0.0633	19	2152184	rs78463393	AP3D1	chr19:2150990-2151963			2152184	2152307	TSS1500
cg19982031	0.967	0.0223046	-2.38418	-4.7474	-0.0563	20	36530548	rs6068087	VSTM2L	chr20:36531143-36532133	CDMR		36530548	36530671	TSS1500
cg03955483	0.967	0.0223828	-2.38269	-4.7506	-0.0528	19	44324481		LYPD5	chr19:44324436-44325009			44324481	44324604	5'UTR
cg24782378	0.967	0.0224625	-2.38117	-4.7538	-0.0605	15	100672379		ADAMTS17				100672379	100672502	Body
cg03370752	0.967	0.0224912	-2.38063	-4.7549	-0.0626	11	61136373		TMEM138			TRUE	61136373	61136496	3'UTR
cg18792022	0.967	0.0225583	-2.37936	-4.7576	-0.0517	1	11709271		FBXO2	chr1:11708767-11709277		TRUE	11709271	11709394	Body
cg23387401	0.967	0.0225984	-2.3786	-4.7592	-0.0535	17	4582204		PELP1			TRUE	4582204	4582327	Body
cg14818701	0.967	0.0226375	-2.37787	-4.7608	-0.114	8	19540453		CSGALNACT1				19540453	19540576	TSS1500
cg07482223	0.967	0.0226444	2.37774	-4.761	0.117	6	30899233	rs4713402	SFTA2				30899233	30899356	3'UTR
cg01997599	0.967	0.0227114	2.37648	-4.7637	0.0915	19	49689673		TRPM4	chr19:49685863-49686233			49689673	49689796	Body
cg00705730	0.967	0.0228145	-2.37454	-4.7678	-0.0523	2	106438120		NCK2			TRUE	106438120	106438243	5'UTR
cg01540522	0.967	0.0228407	-2.37405	-4.7688	-0.0566	8	1948874		KBTBD11	chr8:1949245-1951390		TRUE	1948874	1948997	5'UTR
cg07575896	0.967	0.0228619	2.37366	-4.7696	0.0554	5	157001092		ADAM19	chr5:157001468-157001756			157001092	157001215	Body
cg14022778	0.967	0.0229117	2.37273	-4.7716	0.0559	1	15653601		FHAD1				15653601	15653724	Body
cg23289779	0.967	0.0229185	2.3726	-4.7719	0.051	8	26720681		ADRA1A	chr8:26721642-26724566			26720681	26720804	Body
cg03301058	0.967	0.0229543	2.37194	-4.7733	0.077	6	90007856	rs78997704	GABRR2		DMR	TRUE	90007856	90007979	Body
cg16747828	0.967	0.0229584	2.37186	-4.7734	0.057	12	12938425		APOLD1	chr12:12939713-12940391			12938425	12938548	Body
cg18086635	0.967	0.0229886	-2.3713	-4.7746	-0.0565	18	30051631		FAM59A	chr18:30050115-30051345	RDMR		30051631	30051754	TSS1500
cg00095677	0.967	0.0230362	-2.37042	-4.7765	-0.121	17	3833739		ATP2A3				3833739	3833862	Body
cg13773741	0.967	0.0231212	2.36884	-4.7798	0.065	17	9967499		GAS7				9967499	9967622	Body
cg05208607	0.967	0.0231864	-2.36764	-4.7823	-0.273	16	84520021	rs405185	KIAA1609				84520021	84520144	Body
cg17023203	0.967	0.0231932	-2.36752	-4.7826	-0.065	10	1510048	rs10903464	ADARB2	chr10:1506344-1506708			1510048	1510171	Body
cg09358376	0.967	0.0232186	2.36705	-4.7836	0.0644	12	55639928		OR6C74				55639928	55640051	TSS1500
cg20205477	0.967	0.023305	-2.36546	-4.7869	-0.0609	10	74113178		DNAJB12	chr10:74113815-74114792			74113178	74113301	Body
cg02480666	0.967	0.0233846	2.364	-4.79	0.0503	1	35259746		GJA4	chr1:35258564-35258791			35259746	35259869	5'UTR
cg08957683	0.967	0.0234072	2.36359	-4.7908	0.0539	12	4554878		FGF6	chr12:4554405-4554624			4554878	4555001	TSS200
cg02251663	0.967	0.0234284	2.3632	-4.7917	0.0545	11	14281053		SPON1	chr11:14280741-14281164		TRUE	14281053	14281176	Body
cg17480035	0.967	0.0234809	2.36224	-4.7937	0.218	6	32552670	rs9269993	HLA-DRB1	chr6:32551851-32552331			32552670	32552793	Body
cg25516742	0.967	0.0237058	2.35816	-4.8022	0.0732	13	26503010		ATP8A2			TRUE	26503010	26503133	Body
cg25818583	0.967	0.023717	-2.35796	-4.8027	-0.062	19	55549801	rs28385640	GP6				55549801	55549924	TSS200
cg02556393	0.967	0.0237531	-2.35731	-4.804	-0.0584	3	168866705		MECOM	chr3:168867211-168867413	RDMR	TRUE	168866705	168866828	Body
cg14391907	0.967	0.0237986	-2.35649	-4.8058	-0.0671	9	117349544		ATP6V1G1	chr9:117349887-117350388			117349544	117349667	TSS1500
cg17842918	0.967	0.0238466	-2.35563	-4.8076	-0.0594	13	113540400		ATP11A	chr13:113540350-113540558		TRUE	113540400	113540523	3'UTR
cg03144922	0.967	0.0240176	-2.35257	-4.814	-0.0544	4	111540992		PITX2	chr4:111542062-111544464	RDMR		111540992	111541115	Body
cg00480856	0.967	0.0241069	-2.35097	-4.8173	-0.0592	7	123390035		WASL	chr7:123388399-123389623			123390035	123390158	TSS1500
cg09529138	0.967	0.0241753	-2.34976	-4.8199	-0.0517	7	130419792		KLF14	chr7:130417912-130419378			130419792	130419915	TSS1500
cg22642909	0.967	0.0242088	2.34916	-4.8211	0.0524	5	140220943	rs3756333	PCDHA6	chr5:140221007-140221381			140220943	140221066	Body
cg05374025	0.967	0.0242472	-2.34848	-4.8225	-0.0725	19	55549746	rs28385641	GP6				55549746	55549869	TSS200
cg25319656	0.967	0.0242961	2.34762	-4.8244	0.0582	7	157933750		PTPRN2	chr7:157937614-157937841			157933750	157933873	Body
cg21831174	0.967	0.0243041	2.34748	-4.8247	0.0548	3	187011187		MASP1				187011187	187011310	TSS1500
cg04344000	0.967	0.0244075	2.34566	-4.8285	0.0573	6	117869857		DCBLD1	chr6:117869097-117869530		TRUE	117869857	117869980	Body
cg13004635	0.967	0.0244924	-2.34416	-4.8316	-0.051	5	498425		SLC9A3	chr5:498111-498430			498425	498548	Body
cg03745160	0.967	0.0245339	2.34344	-4.8331	0.0505	19	17393902		ANKLE1	chr19:17392383-17393775			17393902	17394025	Body
cg15644324	0.967	0.0246996	-2.34054	-4.8391	-0.0747	1	42384647		HIVEP3	chr1:42383640-42384003		TRUE	42384647	42384770	TSS200
cg16636104	0.967	0.0247217	2.34016	-4.84	0.0559	7	104004514		LHFPL3			TRUE	104004514	104004637	Body
cg22569496	0.967	0.024841	-2.33809	-4.8443	-0.0581	19	13409671		CACNA1A	chr19:13409561-13410131			13409671	13409794	Body
cg27112585	0.967	0.0248684	2.33761	-4.8453	0.0513	11	70378117		SHANK2			TRUE	70378117	70378240	Body
cg02276823	0.967	0.0249096	-2.3369	-4.8467	-0.0686	7	5000111		MMD2	chr7:4998405-4998950			5000111	5000234	TSS1500
cg23214628	0.967	0.0249213	-2.3367	-4.8472	-0.0506	7	75989305		YWHAG	chr7:75987606-75988977			75989305	75989428	TSS1500
cg09262442	0.967	0.0249305	2.33654	-4.8475	0.0515	10	5728078		C10orf18	chr10:5726455-5727697			5728078	5728201	5'UTR
cg13330559	0.967	0.0249554	-2.33611	-4.8484	-0.0702	17	11144043		SHISA6	chr17:11143487-11145416			11144043	11144166	TSS1500
cg12153480	0.967	0.0249699	2.33586	-4.8489	0.0549	3	186505713		EIF4A2	chr3:186500738-186502048			186505713	186505836	Body
cg12555816	0.967	0.0251122	2.33341	-4.854	0.0502	11	124253092	rs71491826	OR8B2				124253092	124253215	1stExon
cg16080552	0.967	0.025122	-2.33325	-4.8544	-0.0731	1	59043199		TACSTD2	chr1:59042013-59043295		TRUE	59043199	59043322	TSS200
cg16965310	0.967	0.02514	2.33294	-4.855	0.0506	18	29340788		MCART2				29340788	29340911	1stExon
cg00323915	0.967	0.0252168	2.33162	-4.8577	0.0596	7	150264987		GIMAP4				150264987	150265110	5'UTR
cg09455274	0.967	0.0252398	-2.33123	-4.8586	-0.0572	10	68685487		CTNNA3				68685487	68685610	Body
cg20477705	0.967	0.025278	-2.33058	-4.8599	-0.0597	X	11682132		ARHGAP6	chrX:11682333-11684544			11682132	11682255	Body
cg15219811	0.967	0.0254234	-2.32811	-4.8651	-0.0593	10	104259328		ACTR1A	chr10:104262224-104262524			104259328	104259451	Body
cg02275016	0.967	0.0254294	2.32801	-4.8653	0.0719	X	12739263	rs61739515	FRMPD4				12739263	12739386	3'UTR
cg22057675	0.967	0.0254597	-2.32749	-4.8663	-0.0723	7	140103545		RAB19				140103545	140103668	TSS1500
cg15473904	0.967	0.0254932	2.32692	-4.8675	0.0787	9	140446993		MRPL41	chr9:140445653-140446891			140446993	140447116	3'UTR
cg23550826	0.967	0.0257322	-2.3229	-4.8759	-0.05	4	55095282		PDGFRA	chr4:55096185-55100331			55095282	55095405	1stExon
cg06819718	0.967	0.025743	-2.32272	-4.8763	-0.0538	2	45235241		SIX2	chr2:45235511-45237792	RDMR		45235241	45235364	Body
cg27494647	0.967	0.0257792	-2.32211	-4.8775	-0.0709	7	150038898		RARRES2	chr7:150037459-150039031			150038898	150039021	TSS200
cg00028678	0.967	0.0257871	2.32198	-4.8778	0.0504	2	131674175		ARHGEF4	chr2:131673686-131674150			131674175	131674298	TSS200
cg13588086	0.967	0.0258105	-2.32159	-4.8786	-0.0572	9	6644369		GLDC	chr9:6645080-6645975			6644369	6644492	Body
cg02043000	0.967	0.0258432	-2.32104	-4.8797	-0.0543	5	1228081		SLC6A18	chr5:1226976-1227305		TRUE	1228081	1228204	Body
cg02656594	0.967	0.0258511	-2.32091	-4.88	-0.0522	16	27412496		IL21R				27412496	27412619	TSS1500
cg13042918	0.967	0.0259831	2.31871	-4.8846	0.0592	4	119948542		SYNPO2			TRUE	119948542	119948665	Body
cg06720722	0.967	0.0261886	2.3153	-4.8916	0.0592	3	189349021		TP63				189349021	189349144	TSS200
cg04633141	0.967	0.0263005	-2.31346	-4.8955	-0.0775	7	1588319		TMEM184A	chr7:1587240-1587693			1588319	1588442	Body
cg03359503	0.967	0.0263291	-2.31299	-4.8964	-0.0819	X	154563952		CLIC2				154563952	154564075	5'UTR
cg09709951	0.967	0.02642	2.3115	-4.8995	0.0615	12	54017699		ATF7	chr12:54019812-54020283			54017699	54017822	5'UTR
cg24605553	0.967	0.0264705	-2.31067	-4.9012	-0.0698	13	25946972		ATP8A2	chr13:25945993-25946953	CDMR	TRUE	25946972	25947095	Body
cg18329052	0.967	0.0265758	-2.30895	-4.9048	-0.0846	2	219246707	rs7573065	SLC11A1				219246707	219246830	TSS200
cg01022501	0.967	0.0267167	2.30666	-4.9095	0.0777	14	93064986	rs72697285	RIN3			TRUE	93064986	93065109	Body
cg07967091	0.967	0.0269477	-2.30293	-4.9172	-0.0535	19	56988956	rs10425239	ZNF667	chr19:56988313-56989741			56988956	56989079	TSS200
cg09387681	0.967	0.0270177	2.3018	-4.9195	0.136	10	13688165		FRMD4A				13688165	13688288	3'UTR
cg11462099	0.967	0.0270708	-2.30095	-4.9213	-0.052	13	113540512		ATP11A	chr13:113540350-113540558		TRUE	113540512	113540635	3'UTR
cg20457275	0.967	0.0271352	-2.29992	-4.9234	-0.0628	6	1394071		FOXF2	chr6:1393049-1394170		TRUE	1394071	1394194	Body
cg18527574	0.967	0.0274007	-2.29569	-4.9321	-0.058	2	222434303		EPHA4	chr2:222436034-222438941	RDMR		222434303	222434426	Body
cg14182254	0.967	0.0274287	2.29525	-4.933	0.0536	1	29497954		SFRS4			TRUE	29497954	29498077	Body
cg06008724	0.967	0.0274331	-2.29518	-4.9332	-0.0585	22	45403507		PHF21B	chr22:45403036-45406372			45403507	45403630	Body
cg15711616	0.967	0.0274552	2.29483	-4.9339	0.0616	4	111397761		ENPEP	chr4:111397677-111398089			111397761	111397884	1stExon
cg00543493	0.967	0.0275067	2.29401	-4.9356	0.0615	Y	9342875		TSPY4	chrY:9343351-9343614	NA	NA	9342875	9342998	Body
cg12112434	0.967	0.0275255	-2.29371	-4.9362	-0.0589	14	45722987	rs55893630	C14orf106	chr14:45722148-45722802			45722987	45723110	TSS1500
cg13941682	0.967	0.0275949	-2.29262	-4.9384	-0.0586	4	702545		PCGF3	chr4:698302-698692			702545	702668	5'UTR
cg17100158	0.967	0.0276823	-2.29125	-4.9413	-0.055	2	180307728		ZNF385B				180307728	180307851	3'UTR
cg12180703	0.967	0.0276908	-2.29111	-4.9415	-0.0547	20	37353037		SLC32A1	chr20:37352130-37357372			37353037	37353160	TSS200
cg04689773	0.967	0.0276936	2.29107	-4.9416	0.0512	14	92199710		CATSPERB				92199710	92199833	TSS1500
cg09347134	0.967	0.0277388	-2.29036	-4.9431	-0.0565	11	62138845		ASRGL1	chr11:62138621-62138873			62138845	62138968	Body
cg05313317	0.967	0.0278127	-2.2892	-4.9455	-0.0544	X	43833081		NDP				43833081	43833204	TSS200
cg02203665	0.967	0.0278264	2.28899	-4.9459	0.0546	9	100262506		TMOD1	chr9:100263675-100265217			100262506	100262629	TSS1500
cg11173076	0.967	0.0278971	2.28788	-4.9482	0.0599	11	3666278	rs56006393	ART1	chr11:3663052-3663802			3666278	3666401	TSS200
cg05433805	0.967	0.0279553	2.28698	-4.95	0.0638	3	37204814		LRRFIP2			TRUE	37204814	37204937	5'UTR
cg19117063	0.967	0.0280635	-2.28529	-4.9535	-0.0789	6	32365553	rs72847948	BTNL2				32365553	32365676	Body
cg02239640	0.967	0.0280658	-2.28526	-4.9536	-0.0701	X	51487529		GSPT2	chrX:51486414-51487010	RDMR		51487529	51487652	1stExon
cg16266492	0.967	0.0280816	-2.28501	-4.9541	-0.0586	10	135379461	rs28402799	SYCE1	chr10:135378883-135379767			135379461	135379584	TSS1500
cg09627057	0.967	0.0281428	2.28406	-4.956	0.14	3	15377670	rs74491656	SH3BP5	chr3:15373314-15374209			15377670	15377793	5'UTR
cg25341560	0.967	0.0281594	-2.28381	-4.9565	-0.0604	19	35530755		SCN1B	chr19:35531780-35531991			35530755	35530878	3'UTR
cg13728604	0.967	0.0282667	2.28215	-4.9599	0.115	9	132627095	rs72757203	USP20	chr9:132630324-132630823			132627095	132627218	Body
cg20215476	0.967	0.0282735	-2.28204	-4.9601	-0.0765	3	148708241		GYG1	chr3:148709076-148710069			148708241	148708364	TSS1500
cg11881038	0.967	0.0282736	2.28204	-4.9602	0.122	6	154408701		OPRM1				154408701	154408824	Body
cg02698580	0.967	0.0283074	2.28152	-4.9612	0.0519	10	86016643		RGR			TRUE	86016643	86016766	Body
cg01978534	0.967	0.0283227	2.28129	-4.9617	0.0649	3	49711033		APEH	chr3:49710968-49712279			49711033	49711156	TSS1500
cg05767411	0.967	0.0284182	2.27982	-4.9647	0.0514	4	165898825		TRIM61				165898825	165898948	TSS200
cg17179051	0.967	0.0284416	2.27946	-4.9654	0.13	12	100953546	rs35729	NR1H4				100953546	100953669	Body
cg04873188	0.967	0.0284656	-2.27909	-4.9662	-0.0562	2	70143463		MXD1	chr2:70141359-70142939			70143463	70143586	Body
cg21545313	0.967	0.0284667	-2.27908	-4.9662	-0.0671	3	169381972		MECOM	chr3:169379437-169381056			169381972	169382095	TSS1500
cg14242696	0.967	0.0284994	-2.27857	-4.9673	-0.0549	14	73361964		DPF3	chr14:73358789-73360934	RDMR		73361964	73362087	TSS1500
cg12623982	0.967	0.028515	-2.27834	-4.9677	-0.0553	10	119295400		EMX2OS	chr10:119293917-119297675	DMR		119295400	119295523	Body
cg05142677	0.967	0.0286069	2.27693	-4.9706	0.0822	16	88601446		ZFPM1	chr16:88599610-88601530			88601446	88601569	3'UTR
cg17569124	0.967	0.0286305	2.27657	-4.9714	0.06	7	27183643		HOXA5	chr7:27182613-27185562			27183643	27183766	TSS1500
cg25136631	0.967	0.0286589	2.27614	-4.9722	0.0561	6	32729105	rs73402888	HLA-DQB2	chr6:32729342-32729877			32729105	32729228	Body
cg21446655	0.967	0.0288038	-2.27394	-4.9767	-0.172	2	181866505	rs62180114	UBE2E3			TRUE	181866505	181866628	Body
cg01251548	0.967	0.0289919	-2.27109	-4.9825	-0.0521	11	17372745		DKFZp686O24166	chr11:17373019-17373665			17372745	17372868	TSS1500
cg05487134	0.967	0.0290307	2.27051	-4.9837	0.0703	17	40489569		STAT3				40489569	40489692	Body
cg04620298	0.967	0.0290976	2.2695	-4.9858	0.0645	5	175236870		CPLX2			TRUE	175236870	175236993	5'UTR
cg23762517	0.967	0.029145	-2.26879	-4.9872	-0.0559	1	42384310		HIVEP3	chr1:42383640-42384003		TRUE	42384310	42384433	1stExon
cg03995300	0.967	0.0291704	-2.26841	-4.988	-0.0865	17	5019989		ZNF232	chr17:5019050-5019551			5019989	5020112	5'UTR
cg11955878	0.967	0.0292631	2.26702	-4.9908	0.0635	4	165898967		TRIM61				165898967	165899090	TSS200
cg21207686	0.967	0.0293262	2.26608	-4.9928	0.0511	15	99383358		IGF1R				99383358	99383481	Body
cg01320433	0.967	0.0293477	-2.26576	-4.9934	-0.0612	6	169630013		THBS2	chr6:169631759-169632823			169630013	169630136	Body
cg05255811	0.967	0.0296447	-2.26135	-5.0024	-0.0574	6	39192009		KCNK5				39192009	39192132	Body
cg23169883	0.967	0.0296547	-2.2612	-5.0027	-0.0775	10	72435301	rs73276159	ADAMTS14	chr10:72432242-72432738			72435301	72435424	Body
cg04566473	0.967	0.0297681	2.25953	-5.0061	0.0958	13	100517027		CLYBL			TRUE	100517027	100517150	Body
cg08610426	0.967	0.0297831	-2.25931	-5.0066	-0.0683	19	49249123		IZUMO1				49249123	49249246	5'UTR
cg19687193	0.967	0.029808	2.25894	-5.0073	0.142	5	1809712		NDUFS6				1809712	1809835	Body
cg00962903	0.967	0.0298353	-2.25854	-5.0081	-0.0633	3	168863028		MECOM	chr3:168864030-168864449			168863028	168863151	5'UTR
cg05903444	0.967	0.0299083	-2.25747	-5.0103	-0.0536	5	2751041		IRX2	chr5:2748368-2757024			2751041	2751164	Body
cg16590643	0.967	0.0299752	2.25649	-5.0123	0.109	15	42162712		SPTBN5			TRUE	42162712	42162835	Body
cg26250129	0.967	0.0300558	-2.25532	-5.0147	-0.0504	17	79239903		SLC38A10				79239903	79240026	Body
cg17797940	0.967	0.0301425	-2.2565	-5.0012	-0.0787	3	171759519		FNDC3B	chr3:171757493-171758724			171759519	171759642	5'UTR
cg13255542	0.967	0.0302312	-2.25276	-5.0199	-0.0587	11	134120785		THYN1	chr11:134122762-134122981			134120785	134120908	Body
cg14803009	0.967	0.0302454	2.25255	-5.0203	0.0501	2	47630550	rs2303426	MSH2	chr2:47630067-47630791			47630550	47630673	Body
cg17347634	0.967	0.0302816	-2.25203	-5.0213	-0.0596	8	65711916		CYP7B1	chr8:65710990-65711722			65711916	65712039	TSS1500
cg26651280	0.967	0.0302983	2.25179	-5.0218	0.138	16	88909028	rs71395332	GALNS	chr16:88908433-88908698			88909028	88909151	Body
cg11129341	0.967	0.0305629	2.24797	-5.0296	0.0503	11	19870761		NAV2			TRUE	19870761	19870884	Body
cg16661269	0.967	0.0305882	-2.24761	-5.0303	-0.0527	2	223103743		PAX3			TRUE	223103743	223103866	Body
cg24650114	0.967	0.0307464	2.24534	-5.0349	0.051	10	38692317		CDC10L	chr10:38691424-38692162			38692317	38692440	TSS1500
cg07869907	0.967	0.030763	2.2451	-5.0354	0.06	20	44839187		CDH22	chr20:44838887-44839204			44839187	44839310	Body
cg10052190	0.967	0.0308452	-2.24393	-5.0378	-0.0658	16	22019676		C16orf52	chr16:22018987-22020057			22019676	22019799	1stExon
cg09273112	0.967	0.0308864	-2.24334	-5.0389	-0.0561	2	86732413		VPS24				86732413	86732536	3'UTR
cg12477050	0.967	0.0309198	2.24286	-5.0399	0.0708	5	160092633		ATP10B			TRUE	160092633	160092756	Body
cg01006802	0.967	0.031022	-2.24141	-5.0428	-0.0636	16	2892766		TMPRSS8	chr16:2892579-2892810			2892766	2892889	TSS200
cg10695234	0.967	0.031047	2.24106	-5.0436	0.0519	8	95487613		RAD54B	chr8:95486930-95487374			95487613	95487736	TSS1500
cg09535768	0.967	0.0310592	-2.24088	-5.0439	-0.146	6	33052802	rs1042212	HLA-DPB1	chr6:33048416-33048814			33052802	33052925	Body
cg21278103	0.967	0.0310713	-2.24071	-5.0443	-0.0583	20	2928233		PTPRA			TRUE	2928233	2928356	5'UTR
cg01016119	0.967	0.0312183	2.23863	-5.0484	0.0528	3	56835282		ARHGEF3	chr3:56835650-56836210		TRUE	56835282	56835405	Body
cg23365293	0.967	0.0312265	-2.23852	-5.0487	-0.138	6	32489984		HLA-DRB5	chr6:32489742-32490128			32489984	32490107	Body
cg07409471	0.967	0.0312353	-2.23839	-5.0489	-0.0501	17	80833638		TBCD	chr17:80829533-80829871	CDMR	TRUE	80833638	80833761	Body
cg10608596	0.967	0.031259	-2.23806	-5.0496	-0.0585	19	11785125		ZNF833	chr19:11785042-11785282			11785125	11785248	Body
cg18698799	0.967	0.0313618	2.23661	-5.0525	0.214	6	32301513		C6orf10				32301513	32301636	Body
cg18863595	0.967	0.0313789	-2.23637	-5.053	-0.0579	3	6902845		GRM7	chr3:6902823-6903516			6902845	6902968	1stExon
cg17657179	0.967	0.031424	-2.23574	-5.0543	-0.0509	19	52227309		HAS1				52227309	52227432	TSS200
cg23807570	0.967	0.0314283	-2.23568	-5.0544	-0.0682	12	110787107	rs78135790	ATP2A2			TRUE	110787107	110787230	Body
cg16641638	0.967	0.0315778	-2.23359	-5.0586	-0.0743	X	19141251		GPR64	chrX:19139937-19140629			19141251	19141374	TSS1500
cg07010478	0.967	0.0316054	2.2356	-5.0434	0.0592	X	70507624		NONO	chrX:70503261-70503963			70507624	70507747	5'UTR
cg12222949	0.967	0.0316592	-2.23737	-5.0277	-0.0603	1	184005360		GLT25D2	chr1:184005359-184006766	CDMR		184005360	184005483	Body
cg09225457	0.967	0.0317079	2.23177	-5.0623	0.0627	7	8479893		NXPH1	chr7:8481974-8482762			8479893	8480016	Body
cg19220282	0.967	0.0317294	-2.23147	-5.0629	-0.06	2	65217528		SLC1A4	chr2:65215598-65217212	DMR		65217528	65217651	Body
cg15393936	0.967	0.0318149	2.23029	-5.0653	0.075	10	15354631	rs11593435	FAM171A1			TRUE	15354631	15354754	Body
cg05047411	0.967	0.0318857	2.22931	-5.0673	0.0543	X	149009895		MAGEA8				149009895	149010018	TSS200
cg01701649	0.967	0.0319266	-2.22874	-5.0684	-0.0568	16	48589954		N4BP1			TRUE	48589954	48590077	Body
cg14249520	0.967	0.0320071	-2.22763	-5.0706	-0.0619	11	68530177		CPT1A				68530177	68530300	Body
cg21781157	0.967	0.0320146	-2.22753	-5.0708	-0.0667	20	47874111		ZNFX1				47874111	47874234	Body
cg07512814	0.967	0.0320225	2.22742	-5.0711	0.0641	19	11203661		LDLR	chr19:11200919-11201686			11203661	11203784	Body
cg10152997	0.967	0.0320371	-2.22722	-5.0715	-0.0606	20	4721766		PRNT				4721766	4721889	TSS1500
cg23463608	0.967	0.0320383	2.2272	-5.0715	0.0606	19	2607757		GNG7	chr19:2607725-2607967			2607757	2607880	5'UTR
cg19862839	0.967	0.0321526	2.22563	-5.0747	0.0726	17	59543726		TBX4	chr17:59539362-59539834			59543726	59543849	Body
cg15506609	0.967	0.0321659	-2.22544	-5.075	-0.052	7	27206073	rs77936575	HOXA9	chr7:27203915-27206462	DMR		27206073	27206196	TSS1500
cg17004290	0.967	0.0322653	-2.22408	-5.0778	-0.177	4	108853384	rs6849089	CYP2U1	chr4:108852495-108853387	DMR		108853384	108853507	Body
cg00688962	0.967	0.0324213	-2.22195	-5.082	-0.0564	4	21950567		KCNIP4	chr4:21950538-21950865	DMR		21950567	21950690	TSS200
cg15936385	0.967	0.0325448	2.22027	-5.0854	0.0566	11	2405835		CD81	chr11:2406711-2406927			2405835	2405958	Body
cg14623940	0.967	0.0326689	-2.21858	-5.0888	-0.117	2	181887858	rs62180132	UBE2E3			TRUE	181887858	181887981	Body
cg09684846	0.967	0.0326757	-2.21849	-5.089	-0.0604	16	10912718		FAM18A	chr16:10912159-10912719			10912718	10912841	TSS200
cg06657917	0.967	0.0330371	-2.21362	-5.0987	-0.0802	19	613111		HCN2	chr19:612989-614068			613111	613234	Body
cg03716231	0.967	0.0331156	-2.21257	-5.1009	-0.0552	X	23684892		PRDX4	chrX:23685406-23686046			23684892	23685015	TSS1500
cg05280336	0.967	0.0331837	-2.21165	-5.1027	-0.056	6	167789539		TCP10				167789539	167789662	Body
cg17351439	0.967	0.0333574	2.20934	-5.1073	0.0532	13	93888067		GPC6			TRUE	93888067	93888190	Body
cg20829834	0.967	0.0333788	-2.20905	-5.1079	-0.0593	3	63946048		ATXN7			TRUE	63946048	63946171	Body
cg09219182	0.967	0.0335499	-2.20679	-5.1124	-0.191	22	37255542	rs9607387	NCF4	chr22:37252475-37252709			37255542	37255665	TSS1500
cg15419294	0.967	0.0336188	2.20587	-5.1142	0.0502	19	56572945		NLRP5				56572945	56573068	3'UTR
cg14198221	0.967	0.0336496	-2.20547	-5.115	-0.123	14	67983484	rs7160944	TMEM229B	chr14:67981514-67982380			67983484	67983607	TSS1500
cg22822446	0.967	0.0336606	2.20532	-5.1153	0.0765	10	26883013		C10orf50				26883013	26883136	Body
cg16102102	0.967	0.0337401	-2.20427	-5.1174	-0.0715	5	83017553	rs71990123	HAPLN1	chr5:83017894-83018358			83017553	83017676	TSS1500
cg07307789	0.967	0.0338425	2.20293	-5.1201	0.0581	12	4554809		FGF6	chr12:4554405-4554624			4554809	4554932	TSS200
cg09895920	0.967	0.0338825	-2.2024	-5.1212	-0.0532	1	153941186		CREB3L4	chr1:153939643-153939980			153941186	153941309	Body
cg06699848	0.967	0.0339055	2.2021	-5.1218	0.0502	11	8847662	rs78020399	ST5				8847662	8847785	5'UTR
cg09015973	0.967	0.0339061	2.20209	-5.1218	0.0579	2	131673771		ARHGEF4	chr2:131673686-131674150			131673771	131673894	TSS1500
cg19515035	0.967	0.0339506	-2.20151	-5.1229	-0.0521	2	74669516		RTKN	chr2:74667593-74669403			74669516	74669639	TSS1500
cg26328633	0.967	0.0339541	2.20377	-5.1071	0.106	5	135416394		MIR886	chr5:135416204-135416475			135416394	135416517	TSS200
cg09250423	0.967	0.0340156	2.20066	-5.1246	0.0562	16	4717752		MGRN1				4717752	4717875	Body
cg00498211	0.967	0.0340203	-2.2006	-5.1247	-0.0523	2	65217568		SLC1A4	chr2:65215598-65217212			65217568	65217691	Body
cg17267907	0.967	0.0340383	2.20036	-5.1252	0.0713	8	6838024	rs62486785	DEFA1B				6838024	6838147	TSS1500
cg23187802	0.967	0.0340642	2.20003	-5.1259	0.158	10	81173663	rs12358729	ZCCHC24			TRUE	81173663	81173786	Body
cg05119290	0.967	0.0340799	2.19982	-5.1263	0.0537	17	4439394		SPNS2	chr17:4439300-4439705		TRUE	4439394	4439517	Body
cg16054985	0.967	0.0340863	-2.19974	-5.1265	-0.0651	13	94196316		GPC6				94196316	94196439	Body
cg18011916	0.967	0.0341075	-2.19946	-5.127	-0.0618	7	35295120		TBX20	chr7:35296921-35298218	CDMR	TRUE	35295120	35295243	TSS1500
cg22674699	0.967	0.0341755	-2.19858	-5.1288	-0.0692	2	176987918		HOXD9	chr2:176986424-176988291		TRUE	176987918	176988041	1stExon
cg26067760	0.967	0.0343126	-2.19679	-5.1323	-0.0605	10	100996825		HPSE2	chr10:100993820-100994188	RDMR		100996825	100996948	TSS1500
cg26472910	0.967	0.0343229	-2.19666	-5.1326	-0.0563	13	28673762		FLT3	chr13:28674227-28675170			28673762	28673885	Body
cg10187601	0.967	0.0343292	-2.19658	-5.1328	-0.112	7	116789933		ST7			TRUE	116789933	116790056	Body
cg07764059	0.967	0.0343366	2.19648	-5.1329	0.12	7	94538894	rs35383103	PPP1R9A	chr7:94536849-94537477			94538894	94539017	TSS1500
cg12709880	0.967	0.0343639	-2.19613	-5.1336	-0.0728	18	21163172		NPC1	chr18:21166158-21167066			21163172	21163295	Body
cg12562822	0.967	0.0343692	-2.19606	-5.1338	-0.135	5	1219873		SLC6A19	chr5:1218487-1218704			1219873	1219996	Body
cg06821774	0.967	0.0345053	-2.1943	-5.1373	-0.0535	3	197688168		LMLN	chr3:197686919-197687334	RDMR		197688168	197688291	Body
cg02061007	0.967	0.0345203	2.19411	-5.1377	0.139	1	23438087	rs6663369	LUZP1			TRUE	23438087	23438210	5'UTR
cg15138289	0.967	0.0347072	-2.19398	-5.1265	-0.133	6	33051749	rs9277418	HLA-DPB1	chr6:33048416-33048814			33051749	33051872	Body
cg27376870	0.967	0.0349423	2.18869	-5.1484	0.0707	7	1581583		MAFK	chr7:1584054-1584345			1581583	1581706	3'UTR
cg19944656	0.967	0.0350871	-2.18685	-5.1521	-0.0528	17	76876040		TIMP2				76876040	76876163	Body
cg20208052	0.967	0.0351058	-2.18661	-5.1526	-0.0574	X	74376828		ABCB7				74376828	74376951	TSS1500
cg09677976	0.967	0.0351225	-2.1864	-5.153	-0.0946	10	95661	rs35849539	TUBB8	chr10:94526-95301			95661	95784	TSS200
cg10831901	0.967	0.0351353	2.18624	-5.1533	0.0728	20	5485294		LOC149837				5485294	5485417	TSS200
cg03856153	0.967	0.0351432	2.18614	-5.1535	0.0653	3	61904580		PTPRG			TRUE	61904580	61904703	Body
cg06352352	0.967	0.035148	-2.18608	-5.1536	-0.0593	16	67181466		C16orf70	chr16:67183208-67184968			67181466	67181589	3'UTR
cg27024127	0.967	0.0351589	2.18594	-5.1539	0.163	8	27522576	rs505295	SCARA3			TRUE	27522576	27522699	Body
cg20312012	0.967	0.0352961	-2.1842	-5.1573	-0.0599	2	97331035		FER1L5			TRUE	97331035	97331158	Body
cg15829642	0.967	0.0353108	-2.18401	-5.1577	-0.0784	5	140744983	rs34496075	PCDHGA4	chr5:140745531-140745893			140744983	140745106	Body
cg24588468	0.967	0.035373	-2.18323	-5.1593	-0.108	2	26203015		KIF3C	chr2:26204554-26205649		TRUE	26203015	26203138	Body
cg03025830	0.967	0.035566	-2.1808	-5.1641	-0.0632	8	21905599		FGF17	chr8:21905461-21905757			21905599	21905722	Body
cg19015847	0.967	0.0356197	2.18012	-5.1654	0.0587	2	40447561		SLC8A1			TRUE	40447561	40447684	Body
cg27362525	0.967	0.035813	-2.1777	-5.1702	-0.0513	17	5019638		ZNF232	chr17:5019637-5019879			5019638	5019761	5'UTR
cg26341831	0.967	0.0358777	2.1769	-5.1718	0.0572	1	226036279		TMEM63A			TRUE	226036279	226036402	Body
cg08051713	0.967	0.0359219	-2.17634	-5.1729	-0.0506	14	57311640		OTX2OS1			TRUE	57311640	57311763	Body
cg23596425	0.967	0.0359328	-2.17621	-5.1731	-0.0711	2	1494263		TPO	chr2:1493652-1494239			1494263	1494386	Body
cg05516272	0.967	0.0359967	-2.17541	-5.1747	-0.0523	11	66311334		ZDHHC24	chr11:66313169-66313822			66311334	66311457	Body
cg16763089	0.967	0.0360749	2.17444	-5.1766	0.0849	20	5485284		LOC149837				5485284	5485407	TSS200
cg13972661	0.967	0.036077	-2.17442	-5.1767	-0.0523	9	99776416	rs2491811	HIATL2	chr9:99775098-99776102			99776416	99776539	TSS1500
cg09900440	0.967	0.036101	-2.17412	-5.1773	-0.0813	6	33033312		HLA-DPA1				33033312	33033435	3'UTR
cg01956420	0.967	0.0361275	-2.17379	-5.1779	-0.0589	13	110959668		COL4A1	chr13:110958891-110960590	DMR		110959668	110959791	TSS200
rs11249206	0.967	0.0361689	2.17328	-5.1789	0.199	6	32635948	rs2647025	HLA-DQB1	chr6:32632158-32633027			32635948	32636071	TSS1500
cg13659051	0.967	0.0361802	2.17314	-5.1792	0.0581	9	140065943		LRRC26	chr9:140061735-140064864			140065943	140066066	TSS1500
cg23731272	0.967	0.036238	-2.17242	-5.1806	-0.074	15	67356838		SMAD3	chr15:67357339-67359061	RDMR		67356838	67356961	TSS1500
cg16964206	0.967	0.0362671	2.17207	-5.1813	0.0909	7	91795363	rs78325353	LOC401387				91795363	91795486	TSS1500
cg24698211	0.967	0.0362992	-2.17167	-5.1821	-0.0556	5	170877540		FGF18	chr5:170877798-170878210			170877540	170877663	Body
cg11316887	0.967	0.0363318	2.17349	-5.167	0.0609	10	29924694		SVIL			TRUE	29924694	29924817	TSS1500
cg07599136	0.967	0.0366347	2.16755	-5.1902	0.0764	5	415885		AHRR				415885	416008	Body
cg03464224	0.967	0.0366628	2.1672	-5.1909	0.0636	4	154439980		KIAA0922			TRUE	154439980	154440103	Body
cg24760581	0.967	0.0369782	2.16336	-5.1985	0.211	7	150026567	rs11765692	C7orf29			TRUE	150026567	150026690	TSS1500
cg02407415	0.967	0.0370202	2.16285	-5.1995	0.0684	16	857454		PRR25	chr16:857341-858025	DMR		857454	857577	Body
cg08010094	0.967	0.0373018	2.15945	-5.2062	0.0587	2	139539001		NXPH2	chr2:139537692-139538650	CDMR		139539001	139539124	TSS1500
cg13143872	0.967	0.0373106	2.15934	-5.2064	0.154	2	200778865		C2orf69	chr2:200775746-200776548			200778865	200778988	Body
cg06102954	0.967	0.0375087	2.15696	-5.211	0.0509	21	42741788		MX2			TRUE	42741788	42741911	5'UTR
cg04790916	0.967	0.037589	-2.156	-5.2129	-0.0828	Y	15591260		UTY	chrY:15591259-15591720			15591260	15591383	Body
cg06526020	0.967	0.03765	-2.15527	-5.2144	-0.053	6	34308880		NUDT3			TRUE	34308880	34309003	Body
cg15828842	0.967	0.0377089	2.15457	-5.2157	0.0536	10	34527486		PARD3			TRUE	34527486	34527609	Body
cg18202492	0.967	0.0377722	-2.15381	-5.2172	-0.06	1	54274105		TMEM48			TRUE	54274105	54274228	Body
cg19870512	0.967	0.0377875	2.15363	-5.2176	0.0565	12	4919081		KCNA6	chr12:4918273-4919657	DMR		4919081	4919204	5'UTR
cg14537247	0.967	0.0378035	2.15344	-5.2179	0.053	9	126656547		DENND1A			TRUE	126656547	126656670	Body
cg00779294	0.967	0.0378367	2.15305	-5.2187	0.0653	3	87325752		POU1F1				87325752	87325875	TSS200
cg16094767	0.967	0.0380469	2.15055	-5.2236	0.133	17	821595	rs62070219	NXN				821595	821718	Body
cg21695830	0.967	0.0380723	2.15025	-5.2242	0.0698	1	89457462		RBMXL1	chr1:89458034-89458604			89457462	89457585	5'UTR
cg14255256	0.967	0.0380786	-2.15235	-5.2085	-0.0501	2	46465		FAM110C	chr2:45510-46559			46465	46588	TSS200
cg14066298	0.967	0.0380994	-2.14993	-5.2248	-0.0521	6	30297565		TRIM39	chr6:30294169-30295071			30297565	30297688	Body
cg17324941	0.967	0.0381118	2.14979	-5.2251	0.0771	10	38691791	rs61837216	CDC10L	chr10:38691424-38692162			38691791	38691914	TSS200
cg16677019	0.967	0.0381391	-2.14946	-5.2257	-0.056	17	44847268		WNT3	chr17:44847139-44847463			44847268	44847391	Body
cg24135151	0.967	0.0381562	-2.14926	-5.2261	-0.0801	12	133132982	rs12823391	FBRSL1	chr12:133131896-133132157			133132982	133133105	Body
cg10009830	0.967	0.0381592	-2.14923	-5.2262	-0.0553	X	20134904		MAP7D2	chrX:20134203-20135350	DMR		20134904	20135027	TSS200
cg10813980	0.967	0.0381786	-2.149	-5.2267	-0.0648	2	16845587		FAM49A		RDMR	TRUE	16845587	16845710	5'UTR
cg07546360	0.967	0.0382207	2.1485	-5.2276	0.0554	22	46482023		LOC400931	chr22:46481815-46482024			46482023	46482146	Body
cg14326196	0.967	0.0382852	-2.14774	-5.2291	-0.0702	9	116860650		KIF12	chr9:116860473-116860695			116860650	116860773	5'UTR
cg13544075	0.967	0.038314	-2.1474	-5.2298	-0.0593	9	139644102		LCN6	chr9:139640640-139640885			139644102	139644225	TSS1500
cg09611620	0.967	0.0383564	2.1469	-5.2307	0.0524	3	71545533		FOXP1			TRUE	71545533	71545656	5'UTR
cg04005059	0.967	0.0383743	-2.14669	-5.2312	-0.0616	2	23719838		KLHL29			TRUE	23719838	23719961	5'UTR
cg12858166	0.967	0.0384559	-2.14574	-5.233	-0.0711	6	33033176	rs36030612	HLA-DPA1				33033176	33033299	3'UTR
cg19848140	0.967	0.038574	2.14435	-5.2357	0.0605	2	168822706		STK39			TRUE	168822706	168822829	Body
cg04308589	0.967	0.0388354	2.14131	-5.2417	0.0508	10	79110881		KCNMA1			TRUE	79110881	79111004	Body
cg11340603	0.967	0.0388775	2.14082	-5.2426	0.0641	12	79816965		SYT1			TRUE	79816965	79817088	Body
cg04376887	0.967	0.0388891	-2.14068	-5.2429	-0.0554	16	88868839		CDT1	chr16:88869780-88870592	DMR		88868839	88868962	TSS1500
cg09997082	0.967	0.038973	-2.13971	-5.2448	-0.0525	19	46170946	rs73573246	GIPR	chr19:46174372-46174575			46170946	46171069	TSS1500
cg04120272	0.967	0.0391088	-2.13814	-5.2479	-0.0564	17	37123843		FBXO47				37123843	37123966	TSS200
cg21769444	0.967	0.0392992	-2.13594	-5.2521	-0.065	6	34361405		NUDT3	chr6:34359620-34360802	RDMR		34361405	34361528	TSS1500
cg08946713	0.967	0.0393274	-2.13562	-5.2528	-0.0522	2	191844998		STAT1			TRUE	191844998	191845121	Body
cg13255398	0.967	0.0395382	-2.1332	-5.2575	-0.052	11	16836827		PLEKHA7			TRUE	16836827	16836950	Body
cg08468443	0.967	0.0395731	-2.1328	-5.2582	-0.0682	X	154563852		CLIC2				154563852	154563975	5'UTR
cg04992665	0.967	0.039589	2.13262	-5.2586	0.102	8	124547604	rs72709034	FBXO32			TRUE	124547604	124547727	Body
cg04200010	0.967	0.0397119	-2.13122	-5.2613	-0.0535	5	125931362	rs3736173	ALDH7A1	chr5:125930601-125931049			125931362	125931485	TSS1500
cg10990737	0.967	0.039798	-2.13024	-5.2632	-0.0702	Y	16637142		NLGN4Y	chrY:16635739-16636047			16637142	16637265	Body
cg18685243	0.967	0.03981	2.1301	-5.2635	0.0626	12	58015069		SLC26A10	chr12:58014708-58015697	DMR	TRUE	58015069	58015192	Body
cg08066376	0.967	0.0398428	-2.12973	-5.2642	-0.0533	11	59577361		MRPL16	chr11:59578090-59578379	CDMR		59577361	59577484	Body
cg00809164	0.967	0.0398577	-2.12956	-5.2645	-0.0549	16	56651049		MT1L	chr16:56650981-56651384	RDMR	TRUE	56651049	56651172	TSS1500
cg07469402	0.967	0.039875	-2.12937	-5.2649	-0.0549	12	45444767	rs7309286	DBX2	chr12:45444202-45445386		TRUE	45444767	45444890	1stExon
cg14200127	0.967	0.0399022	-2.12906	-5.2655	-0.0524	1	97604182	rs76208521	DPYD			TRUE	97604182	97604305	Body
cg10122050	0.967	0.0399873	2.12809	-5.2674	0.0706	10	106059062		GSTO2				106059062	106059185	3'UTR
cg00692780	0.967	0.0400158	-2.12777	-5.268	-0.06	2	222434778		EPHA4	chr2:222436034-222438941			222434778	222434901	Body
cg02754084	0.967	0.0401125	2.12668	-5.2701	0.0507	12	72338080		TPH2			TRUE	72338080	72338203	Body
cg10919109	0.967	0.0401335	2.12644	-5.2706	0.127	13	114764621	rs78400130	RASA3	chr13:114764353-114764622			114764621	114764744	Body
cg11391335	0.967	0.0401345	-2.12643	-5.2706	-0.0592	1	119521928		TBX15	chr1:119522385-119522638			119521928	119522051	5'UTR
cg26033526	0.967	0.040162	2.12612	-5.2712	0.059	6	32819858	rs2071481	TAP1	chr6:32820849-32822370			32819858	32819981	Body
cg03323793	0.967	0.040187	-2.12584	-5.2718	-0.0511	7	151548111		PRKAG2				151548111	151548234	Body
cg25201255	0.967	0.040218	2.12549	-5.2725	0.0561	12	5576120		NTF3			TRUE	5576120	5576243	Body
cg17959183	0.967	0.0402346	-2.1253	-5.2728	-0.0615	2	26297671	rs7605394	RAB10			TRUE	26297671	26297794	Body
cg11409361	0.967	0.0403824	2.12364	-5.276	0.0522	17	1041006	rs58957705	ABR				1041006	1041129	Body
cg13286698	0.967	0.040404	2.1234	-5.2765	0.051	8	11203882		TDH	chr8:11204825-11205689			11203882	11204005	Body
cg04863005	0.967	0.0404676	-2.12268	-5.2779	-0.0831	1	59043208		TACSTD2	chr1:59042013-59043295		TRUE	59043208	59043331	TSS200
cg17344770	0.967	0.040495	-2.12237	-5.2785	-0.0706	19	3537694		C19orf71				3537694	3537817	TSS1500
cg21548813	0.967	0.0405717	-2.12152	-5.2802	-0.094	6	291882		DUSP22	chr6:291948-292839			291882	292005	TSS1500
cg06400119	0.967	0.0405997	-2.1212	-5.2808	-0.0719	7	158046222		PTPRN2				158046222	158046345	Body
cg15930643	0.967	0.0406849	2.12025	-5.2826	0.0583	5	61001539		FLJ37543				61001539	61001662	3'UTR
cg19371916	0.967	0.040692	-2.12017	-5.2828	-0.0565	1	8874984		RERE	chr1:8877012-8877283			8874984	8875107	5'UTR
cg19624354	0.967	0.0408532	2.11838	-5.2862	0.0571	11	113113890		NCAM1				113113890	113114013	Body
cg08302695	0.967	0.0408538	-2.11837	-5.2862	-0.0695	X	15518655		BMX				15518655	15518778	TSS1500
cg19931348	0.967	0.0408648	-2.11825	-5.2865	-0.0537	20	43803224		PI3				43803224	43803347	TSS1500
cg12532878	0.967	0.0410454	2.11625	-5.2903	0.112	13	114837593	rs9525375	RASA3	chr13:114838658-114839092			114837593	114837716	Body
cg26748578	0.967	0.0412106	-2.11442	-5.2939	-0.0556	2	65217211		SLC1A4	chr2:65215598-65217212			65217211	65217334	1stExon
cg09697033	0.967	0.0412599	2.11388	-5.2949	0.0699	8	10929599		XKR6	chr8:10928984-10929211			10929599	10929722	Body
cg02320474	0.967	0.0412882	-2.11357	-5.2955	-0.0518	16	1758022		MAPK8IP3		RDMR		1758022	1758145	Body
cg25057035	0.967	0.0413318	-2.11309	-5.2965	-0.0962	6	33053889	rs9277485	HLA-DPB1				33053889	33054012	Body
cg02243386	0.967	0.0413334	2.11307	-5.2965	0.0519	3	39234924		XIRP1				39234924	39235047	TSS1500
cg23073032	0.967	0.0413418	2.11298	-5.2967	0.0714	1	214724414	rs12745587	PTPN14	chr1:214724104-214725056			214724414	214724537	5'UTR
cg21315873	0.967	0.0414593	2.11169	-5.2992	0.0537	2	228740506		WDR69	chr2:228736230-228736544			228740506	228740629	Body
cg05763324	0.967	0.0414667	2.1116	-5.2993	0.0674	16	69386882	rs62057890	TMED6				69386882	69387005	TSS1500
cg22152446	0.967	0.0416322	-2.10979	-5.3028	-0.0604	4	48754953		FRYL			TRUE	48754953	48755076	5'UTR
cg07205627	0.967	0.0417071	-2.10898	-5.3044	-0.0682	8	65496126		BHLHE22	chr8:65492935-65494452			65496126	65496249	1stExon
cg09086151	0.967	0.0417808	-2.10817	-5.3059	-0.106	6	32550067	rs9269833	HLA-DRB1	chr6:32551851-32552331			32550067	32550190	Body
cg01332882	0.967	0.041856	-2.10735	-5.3075	-0.0524	20	47874155		ZNFX1				47874155	47874278	Body
cg05454562	0.967	0.0418571	-2.10734	-5.3075	-0.051	6	33254447		WDR46	chr6:33256539-33256973			33254447	33254570	Body
cg03344051	0.967	0.0420688	2.10504	-5.312	0.0748	7	150018095		ACTR3C	chr7:150019950-150020752			150018095	150018218	5'UTR
cg25821974	0.967	0.0421005	-2.1047	-5.3126	-0.0544	3	128486192		RAB7A	chr3:128483727-128484050		TRUE	128486192	128486315	5'UTR
cg20781967	0.967	0.0421741	2.1039	-5.3142	0.0608	12	772688		NINJ2			TRUE	772688	772811	1stExon
cg00901598	0.967	0.042193	-2.1037	-5.3145	-0.0544	3	172164984		GHSR	chr3:172165372-172166738			172164984	172165107	Body
cg08617160	0.967	0.0422133	-2.10348	-5.315	-0.0515	19	345312		MIER2	chr19:345260-345590			345312	345435	TSS1500
cg26312920	0.967	0.0422319	2.10328	-5.3154	0.0627	7	31380390		NEUROD6	chr7:31375845-31376542			31380390	31380513	5'UTR
cg24354208	0.967	0.0422727	2.10284	-5.3162	0.0514	19	35841676		FFAR1	chr19:35842430-35843187			35841676	35841799	TSS1500
cg10978526	0.967	0.0423026	-2.10252	-5.3168	-0.144	7	143140416	rs58270521	TAS2R60				143140416	143140539	TSS200
cg15227911	0.967	0.0423227	2.1023	-5.3172	0.0546	17	7792059		CHD3	chr17:7788261-7789091	RDMR	TRUE	7792059	7792182	Body
cg02048613	0.967	0.04239	2.10158	-5.3186	0.0577	2	161343862		RBMS1			TRUE	161343862	161343985	Body
cg26004203	0.967	0.0425582	-2.09977	-5.3221	-0.0508	1	217310918	rs12073272	ESRRG	chr1:217310749-217311178	DMR		217310918	217311041	5'UTR
cg21544585	0.967	0.0425717	2.09963	-5.3224	0.0588	4	122687481		TMEM155	chr4:122685860-122686565	CDMR		122687481	122687604	TSS1500
cg13474450	0.967	0.0425878	-2.09945	-5.3227	-0.0503	8	142222685		SLC45A4	chr8:142221016-142221482			142222685	142222808	Body
cg16643603	0.967	0.0426385	-2.09891	-5.3238	-0.0541	12	54954941		PDE1B				54954941	54955064	TSS200
rs951295	0.967	0.0426515	2.09877	-5.324	0.232	6	32557970	rs9270341	HLA-DRB1				32557970	32558093	TSS1500
cg14038058	0.967	0.042745	2.09777	-5.3259	0.0553	4	165898848		TRIM61				165898848	165898971	TSS200
cg11330098	0.967	0.0428402	-2.09676	-5.3279	-0.0656	11	111895234		DLAT	chr11:111895576-111896447			111895234	111895357	TSS1500
cg18434356	0.967	0.0428893	-2.09623	-5.3289	-0.102	4	15376215	rs73799819	C1QTNF7				15376215	15376338	Body
cg08871608	0.967	0.0428971	-2.09615	-5.3291	-0.0679	19	40729274		CNTD2	chr19:40729087-40729430		TRUE	40729274	40729397	Body
cg18977891	0.967	0.043	-2.09506	-5.3312	-0.0506	8	134571813		ST3GAL1			TRUE	134571813	134571936	5'UTR
cg03744383	0.967	0.0430138	-2.09491	-5.3314	-0.0546	16	55867072		CES1	chr16:55866647-55866998			55867072	55867195	1stExon
cg09636756	0.967	0.0431398	2.09357	-5.334	0.144	18	77134251		ATP9B	chr18:77134250-77134551			77134251	77134374	Body
cg19254152	0.967	0.0431482	-2.09348	-5.3342	-0.0537	7	1083473		C7orf50	chr7:1084387-1084595			1083473	1083596	Body
cg10973622	0.967	0.0433435	-2.09344	-5.3224	-0.0658	2	86423274		IMMT	chr2:86422068-86422858			86423274	86423397	TSS1500
cg01271423	0.967	0.0433944	-2.09088	-5.3391	-0.0514	10	100366981	rs76384883	HPSE2			TRUE	100366981	100367104	Body
cg01270299	0.967	0.0434173	2.09064	-5.3396	0.175	19	53099757	rs4801923	ZNF137				53099757	53099880	TSS200
cg03796003	0.967	0.0435393	-2.08936	-5.3421	-0.203	16	2746544		KCTD5	chr16:2746527-2746794			2746544	2746667	Body
cg11546137	0.967	0.0436204	-2.08851	-5.3437	-0.0522	2	176972563		HOXD11	chr2:176973427-176973718			176972563	176972686	1stExon
cg23445003	0.967	0.0437073	-2.0876	-5.3454	-0.0768	7	101535821		CUX1			TRUE	101535821	101535944	Body
cg19092167	0.967	0.043725	2.08741	-5.3458	0.0517	3	187007559		MASP1				187007559	187007682	Body
cg10916515	0.967	0.0438446	2.08616	-5.3482	0.051	10	1246336		ADARB2				1246336	1246459	Body
cg16827215	0.967	0.0441833	2.08263	-5.3549	0.084	11	11292635	rs12282251	GALNTL4				11292635	11292758	3'UTR
cg04297105	0.967	0.0445107	-2.07925	-5.3614	-0.0627	2	103235258		SLC9A2	chr2:103235376-103236554		TRUE	103235258	103235381	TSS1500
cg25735305	0.967	0.0445271	2.08107	-5.346	0.0552	11	124629580		ESAM	chr11:124628367-124629590			124629580	124629703	Body
cg00682263	0.967	0.0445801	-2.07853	-5.3627	-0.0537	15	66188803		MEGF11				66188803	66188926	3'UTR
cg20931907	0.967	0.0446035	2.07829	-5.3632	0.0593	X	51149742		CXorf67	chrX:51149661-51150911			51149742	51149865	TSS200
cg09002684	0.967	0.044709	2.07721	-5.3653	0.0571	6	3293797		SLC22A23				3293797	3293920	Body
cg10273821	0.967	0.0448607	2.07566	-5.3682	0.0569	15	28014188		OCA2	chr15:28015346-28015795			28014188	28014311	Body
cg15730481	0.967	0.0451351	2.07285	-5.3736	0.0624	7	1126318		GPER	chr7:1126578-1126910			1126318	1126441	TSS200
cg22708087	0.967	0.045317	2.07101	-5.3771	0.0553	13	32780062		FRY			TRUE	32780062	32780185	Body
cg08454507	0.967	0.0453834	-2.07033	-5.3783	-0.0581	17	78755406		RPTOR				78755406	78755529	Body
cg24065270	0.967	0.045396	2.0702	-5.3786	0.0569	5	142005152		FGF1			TRUE	142005152	142005275	5'UTR
cg00509610	0.967	0.0454417	-2.06974	-5.3795	-0.0752	3	12528629		TSEN2	chr3:12525749-12526346			12528629	12528752	5'UTR
cg21131239	0.967	0.0454633	-2.06952	-5.3799	-0.065	X	74376811		ABCB7				74376811	74376934	TSS1500
cg24603464	0.967	0.0454715	-2.06944	-5.38	-0.0621	2	238395852		MLPH	chr2:238395061-238396241			238395852	238395975	TSS200
cg03146219	0.967	0.0456975	-2.06716	-5.3844	-0.06	11	71189514		NADSYN1				71189514	71189637	Body
cg10211414	0.967	0.0457798	-2.06633	-5.3859	-0.0512	1	8875053		RERE	chr1:8877012-8877283			8875053	8875176	5'UTR
cg14752227	0.967	0.0458501	-2.06562	-5.3873	-0.0831	20	34000481		UQCC				34000481	34000604	TSS1500
cg14260773	0.967	0.0459363	2.06476	-5.3889	0.0558	2	33226136		LTBP1			TRUE	33226136	33226259	Body
cg16662938	0.967	0.0459884	2.06424	-5.3899	0.0928	10	114116449		GUCY2G				114116449	114116572	TSS200
cg27303223	0.967	0.0460786	-2.06334	-5.3916	-0.068	10	28035822		MKX	chr10:28030182-28035211	RDMR		28035822	28035945	TSS1500
cg07300408	0.967	0.0461333	-2.06279	-5.3927	-0.0716	14	21058360		RNASE12				21058360	21058483	1stExon
cg02486855	0.967	0.0461613	-2.06251	-5.3932	-0.0731	15	67356942		SMAD3	chr15:67357339-67359061	RDMR		67356942	67357065	TSS1500
cg18932726	0.967	0.0461914	-2.06221	-5.3938	-0.055	10	128594141		DOCK1	chr10:128593609-128595048			128594141	128594264	Body
cg24757160	0.967	0.0463158	-2.06097	-5.3961	-0.0734	11	67804112		NDUFS8	chr11:67806251-67806611			67804112	67804235	3'UTR
cg01758122	0.967	0.0464506	2.05963	-5.3986	0.137	13	114783503		RASA3	chr13:114783502-114783733			114783503	114783626	Body
cg08590069	0.967	0.0465579	-2.05857	-5.4007	-0.0526	8	101118899		RGS22	chr8:101117922-101118693		TRUE	101118899	101119022	TSS1500
cg11607219	0.967	0.0465748	-2.0584	-5.401	-0.14	7	143140164	rs34910453	TAS2R60				143140164	143140287	TSS1500
cg08412936	0.967	0.0466493	2.05766	-5.4024	0.134	6	31097051		PSORS1C1				31097051	31097174	5'UTR
cg21235746	0.967	0.0467016	2.05714	-5.4033	0.0609	20	5485144	rs2423107	LOC149837				5485144	5485267	Body
cg17442155	0.967	0.0467223	-2.05694	-5.4037	-0.0513	7	99955675		PILRB				99955675	99955798	5'UTR
cg22037249	0.967	0.0467902	-2.05627	-5.405	-0.0992	6	33037690	rs66799959	HLA-DPA1				33037690	33037813	Body
cg04963199	0.967	0.0468047	2.05613	-5.4053	0.131	16	87868947	rs13329933	SLC7A5			TRUE	87868947	87869070	Body
cg03542797	0.967	0.0468716	2.05547	-5.4065	0.09	14	95649402		CLMN			TRUE	95649402	95649525	3'UTR
cg10819420	0.967	0.0469213	-2.05498	-5.4074	-0.0554	2	237074360		GBX2	chr2:237071794-237078762			237074360	237074483	3'UTR
cg06683094	0.967	0.0471024	-2.0532	-5.4108	-0.0533	5	140177056		PCDHA2	chr5:140175666-140176813			140177056	140177179	Body
cg24476939	0.967	0.0471944	2.0523	-5.4125	0.087	20	43804797	rs34885285	PI3				43804797	43804920	3'UTR
cg13999433	0.967	0.0473296	-2.05097	-5.415	-0.062	9	117156883		AKNA	chr9:117160139-117161064			117156883	117157006	TSS200
cg18699744	0.967	0.0473427	-2.05085	-5.4152	-0.0577	10	118387207		PNLIPRP2	chr10:118387017-118387476			118387207	118387330	Body
cg21463380	0.967	0.0473504	2.05269	-5.3997	0.0546	3	187389127		SST	chr3:187387914-187388176			187389127	187389250	TSS1500
cg05655647	0.967	0.0474613	-2.04969	-5.4174	-0.0624	12	51157023		ATF1	chr12:51157498-51158842			51157023	51157146	TSS1500
cg23478293	0.967	0.0475079	-2.04924	-5.4183	-0.0572	14	57279275		OTX2OS1	chr14:57278068-57278287	CDMR		57279275	57279398	TSS1500
cg20597403	0.967	0.0475358	-2.04897	-5.4188	-0.0659	7	4305042		SDK1	chr7:4303079-4305062			4305042	4305165	Body
cg02227879	0.967	0.0476018	-2.04832	-5.42	-0.0576	10	75576192		CAMK2G			TRUE	75576192	75576315	Body
cg11976790	0.967	0.0476068	-2.04828	-5.4201	-0.0693	10	124320064	rs79021001	DMBT1				124320064	124320187	TSS200
cg25131079	0.967	0.0478397	2.04602	-5.4243	0.0565	5	178712051	rs6888613	ADAMTS2			TRUE	178712051	178712174	Body
cg01962183	0.967	0.0478812	-2.04562	-5.4251	-0.0524	16	1507866		CLCN7	chr16:1505976-1506202			1507866	1507989	Body
cg25074794	0.967	0.0481641	-2.04289	-5.4302	-0.0531	10	45958885	rs2291429	2019-03-08				45958885	45959008	Body
cg27185267	0.967	0.0482207	-2.04234	-5.4312	-0.052	3	9769333		CPNE9	chr3:9773066-9773911			9769333	9769456	Body
cg04337937	0.967	0.0483279	2.04131	-5.4332	0.0671	13	24008382		SACS				24008382	24008505	TSS1500
cg20696674	0.967	0.048353	2.04107	-5.4336	0.131	1	28826586		PHACTR4				28826586	28826709	3'UTR
cg09674502	0.967	0.0483658	-2.04095	-5.4339	-0.0501	1	92953279		GFI1	chr1:92945907-92952609			92953279	92953402	TSS1500
cg23467079	0.967	0.0484245	2.04039	-5.4349	0.0519	8	124219425		FAM83A	chr8:124219411-124219809			124219425	124219548	Body
cg09616536	0.967	0.0484851	2.03981	-5.436	0.138	3	64670013	rs72061684	ADAMTS9	chr3:64671087-64673957			64670013	64670136	Body
cg23878260	0.967	0.0484967	-2.0397	-5.4362	-0.0618	12	124827315		NCOR2	chr12:124829153-124829490			124827315	124827438	Body
cg09506661	0.967	0.0485008	2.03966	-5.4363	0.0602	19	1152022		SBNO2	chr19:1152015-1152249			1152022	1152145	Body
cg04609875	0.967	0.0485026	2.03964	-5.4363	0.0607	12	70763703		KCNMB4	chr12:70759437-70761052			70763703	70763826	Body
cg07545925	0.967	0.0485447	2.03924	-5.4371	0.0563	11	118214927		CD3G				118214927	118215050	TSS200
cg00439981	0.967	0.0485664	-2.03903	-5.4375	-0.0553	6	170684299		FAM120B	chr6:170686006-170687003			170684299	170684422	Body
cg07589531	0.967	0.0485764	2.03894	-5.4376	0.113	10	13970236		FRMD4A			TRUE	13970236	13970359	Body
cg06599908	0.967	0.0485774	-2.03893	-5.4377	-0.051	19	54931632		TTYH1	chr19:54927902-54928225			54931632	54931755	Body
cg00362322	0.967	0.048602	-2.03869	-5.4381	-0.0517	16	88704230		IL17C	chr16:88706211-88706492			88704230	88704353	TSS1500
cg11306735	0.967	0.0486332	2.03839	-5.4387	0.0647	19	49943812		SLC17A7	chr19:49944408-49944656			49943812	49943935	Body
cg03029975	0.967	0.0486339	-2.03839	-5.4387	-0.0554	17	19280571		MAPK7	chr17:19281000-19282541			19280571	19280694	TSS1500
cg21460394	0.967	0.0487598	-2.03719	-5.4409	-0.0596	1	17020457		ESPNP	chr1:17018683-17020959	DMR	TRUE	17020457	17020580	Body
cg20311002	0.967	0.0487665	2.03712	-5.441	0.0688	1	244763541		C1orf101			TRUE	244763541	244763664	Body
cg02601489	0.967	0.0488337	2.03649	-5.4422	0.0537	8	11203954		TDH	chr8:11204825-11205689			11203954	11204077	Body
cg27435239	0.967	0.0488638	2.0362	-5.4428	0.0698	15	76033022	rs7171891	DNM1P35	chr15:76030564-76031664			76033022	76033145	TSS1500
cg27272246	0.967	0.0488845	2.036	-5.4431	0.133	3	38664451	rs72862756	SCN5A			TRUE	38664451	38664574	Body
cg15580309	0.967	0.0489282	-2.03559	-5.4439	-0.0754	1	46814106		NSUN4				46814106	46814229	Body
cg01003599	0.967	0.048948	-2.0354	-5.4443	-0.0548	1	213123436		VASH2	chr1:213123647-213125092			213123436	213123559	TSS1500
cg10048215	0.967	0.0489509	2.03537	-5.4443	0.0524	12	12938383		APOLD1	chr12:12939713-12940391			12938383	12938506	Body
cg18811184	0.967	0.0489689	2.0352	-5.4446	0.0585	X	18720556		PPEF1			TRUE	18720556	18720679	5'UTR
cg15591384	0.967	0.0491005	2.03396	-5.447	0.146	6	32525960		HLA-DRB6				32525960	32526083	Body
cg15068593	0.967	0.0491671	-2.03333	-5.4482	-0.189	12	96586924	rs12297663	ELK3	chr12:96587839-96588090			96586924	96587047	TSS1500
cg05241355	0.967	0.0492207	-2.03282	-5.4491	-0.0544	14	57278351		OTX2	chr14:57278709-57279116			57278351	57278474	TSS1500
cg06001716	0.967	0.0494631	-2.03054	-5.4534	-0.0521	17	41278141		BRCA1	chr17:41278134-41278460			41278141	41278264	TSS1500
cg21139795	0.967	0.0495671	2.02956	-5.4552	0.0782	3	119243933		CD80			TRUE	119243933	119244056	3'UTR
cg20698421	0.967	0.0496315	-2.02896	-5.4563	-0.0614	2	65217623		SLC1A4	chr2:65215598-65217212			65217623	65217746	Body
cg22094163	0.967	0.0496701	2.0286	-5.457	0.05	2	86703710		KDM3A			TRUE	86703710	86703833	Body
cg01317752	0.967	0.0497399	-2.02794	-5.4582	-0.127	X	7810800	rs2529876	VCX				7810800	7810923	5'UTR
cg27514038	0.967	0.0501399	-2.02608	-5.4496	-0.0703	15	23035493		NIPA2	chr15:23033933-23034710			23035493	23035616	TSS1500
