# Supplementary material for: Association between promoter DNA methylation and gene expression in the pathogenesis of ischemic stroke
Source: Aging (Albany NY). 2019 Sep 17;11(18):7663–77. doi: 10.18632/aging.102278 (PMC6781986; doi:10.18632/aging.102278)
Supplement: Supplementary Table 2 [file aging-11-102278-s001.xlsx]

## Sheet: Supplementary Table 2
ONTOLOGY	ID	Description	GeneRatio	BgRatio	pvalue	p.adjust	qvalue	geneID	Count
BP	GO:0055117	regulation of cardiac muscle contraction	13/546	81/17913	9.57396e-07	0.00418095	0.0037923	ADRA1A/ATP1B1/ATP2A2/CASQ2/CHGA/CLIC2/CTNNA3/HDAC4/HRC/SCN5A/SLC8A1/TNNI3/TRPM4	13
BP	GO:0003012	muscle system process	33/546	448/17913	2.96637e-06	0.00647707	0.00587497	ADRA1A/ATP1B1/ATP2A2/ATP2B4/ATP8A2/CACNA1H/CAMK2G/CASQ2/CHGA/CLIC2/CTNNA3/GATA5/GHRL/GHSR/GLRA1/HDAC4/HRC/ITGA1/KCNMA1/MYH11/MYOD1/NDUFS6/PGAM2/SCN1B/SCN5A/SLC8A1/SMAD3/TBX20/TIAM1/TMOD1/TNNI3/TRPC3/TRPM4	33
BP	GO:0006942	regulation of striated muscle contraction	13/546	96/17913	6.78492e-06	0.00779627	0.00707155	ADRA1A/ATP1B1/ATP2A2/CASQ2/CHGA/CLIC2/CTNNA3/HDAC4/HRC/SCN5A/SLC8A1/TNNI3/TRPM4	13
BP	GO:0006936	muscle contraction	27/546	343/17913	7.14108e-06	0.00779627	0.00707155	ADRA1A/ATP1B1/ATP2A2/ATP2B4/ATP8A2/CACNA1H/CASQ2/CHGA/CLIC2/CTNNA3/GHRL/GHSR/GLRA1/HDAC4/HRC/ITGA1/KCNMA1/MYH11/NDUFS6/PGAM2/SCN1B/SCN5A/SLC8A1/TBX20/TMOD1/TNNI3/TRPM4	27
BP	GO:0043010	camera-type eye development	24/546	295/17913	1.33019e-05	0.0116103	0.010531	ATP2B4/ATP8A2/BFSP2/BMP7/COL4A1/FAT1/FOXF2/GPM6A/IFT140/KDM2B/LRP5/MEGF11/MYOM2/NDP/NRP1/PAX6/PDGFRA/PHACTR4/PITX2/SDK1/SLC17A7/SMAD3/TGFBR2/TMOD1	24
BP	GO:0010882	regulation of cardiac muscle contraction by calcium ion signaling	7/546	28/17913	1.59518e-05	0.0116103	0.010531	ATP1B1/CASQ2/CLIC2/HDAC4/HRC/SLC8A1/TNNI3	7
BP	GO:0035637	multicellular organismal signaling	18/546	193/17913	2.66059e-05	0.0165068	0.0149724	ATP1B1/ATP2A2/ATP2A3/ATP2B4/CASQ2/CTNNA3/FXYD2/GHRL/GHSR/GLRA1/HRC/KCNIP4/KCNMB4/NRCAM/SCN1B/SCN5A/SLC8A1/TRPM4	18
BP	GO:0090257	regulation of muscle system process	21/546	251/17913	3.02392e-05	0.0165068	0.0149724	ADRA1A/ATP1B1/ATP2A2/ATP2B4/CAMK2G/CASQ2/CHGA/CLIC2/CTNNA3/FBXO32/GATA5/GHRL/GHSR/HDAC4/HRC/SCN5A/SLC8A1/SMAD3/TNNI3/TRPC3/TRPM4	21
BP	GO:0030198	extracellular matrix organization	25/546	334/17913	3.6095e-05	0.0175141	0.015886	ADAM19/ADAMTS14/ADAMTS2/ADAMTS9/ANTXR1/COL18A1/COL4A1/COL4A2/CSGALNACT1/DPP4/ETS1/FOXF2/HAPLN1/HAS1/HPSE2/ITGA1/ITGA2B/MYH11/PDGFRA/PRDX4/SMAD3/SMOC2/ST7/TIMP2/TNXB	25
BP	GO:0003002	regionalization	24/546	318/17913	4.51485e-05	0.0197163	0.0178836	CELSR1/FGF1/GATA5/GBX2/HOXA3/HOXA9/HOXD11/HOXD9/IFT140/IRX1/IRX2/KDM2B/LMX1B/NRP1/NRP2/OTX2/PAX6/PITX2/SIX2/SMAD3/TBX20/TP63/TTC21B/WNT3	24
BP	GO:0001654	eye development	25/546	342/17913	5.31663e-05	0.020615	0.0186987	ATP2B4/ATP8A2/BFSP2/BMP7/COL4A1/FAT1/FOXF2/GPM6A/IFT140/KDM2B/LRP5/MEGF11/MYOM2/NDP/NRP1/PAX6/PDGFRA/PHACTR4/PITX2/SDK1/SLC17A7/SMAD3/STAT3/TGFBR2/TMOD1	25
BP	GO:0043062	extracellular structure organization	27/546	387/17913	6.02585e-05	0.020615	0.0186987	ADAM19/ADAMTS14/ADAMTS2/ADAMTS9/ANTXR1/BMP7/COL18A1/COL4A1/COL4A2/CSGALNACT1/DPP4/ETS1/FOXF2/HAPLN1/HAS1/HPSE2/ITGA1/ITGA2B/MYH11/PDGFRA/PRDX4/SMAD3/SMOC2/ST7/STAM/TIMP2/TNXB	27
BP	GO:0150063	visual system development	25/546	346/17913	6.41693e-05	0.020615	0.0186987	ATP2B4/ATP8A2/BFSP2/BMP7/COL4A1/FAT1/FOXF2/GPM6A/IFT140/KDM2B/LRP5/MEGF11/MYOM2/NDP/NRP1/PAX6/PDGFRA/PHACTR4/PITX2/SDK1/SLC17A7/SMAD3/STAT3/TGFBR2/TMOD1	25
BP	GO:0006941	striated muscle contraction	16/546	170/17913	6.60889e-05	0.020615	0.0186987	ADRA1A/ATP1B1/ATP2A2/ATP8A2/CASQ2/CHGA/CLIC2/CTNNA3/HDAC4/HRC/PGAM2/SCN1B/SCN5A/SLC8A1/TNNI3/TRPM4	16
BP	GO:0048880	sensory system development	25/546	351/17913	8.07724e-05	0.0219296	0.0198911	ATP2B4/ATP8A2/BFSP2/BMP7/COL4A1/FAT1/FOXF2/GPM6A/IFT140/KDM2B/LRP5/MEGF11/MYOM2/NDP/NRP1/PAX6/PDGFRA/PHACTR4/PITX2/SDK1/SLC17A7/SMAD3/STAT3/TGFBR2/TMOD1	25
BP	GO:0008016	regulation of heart contraction	20/546	249/17913	8.21622e-05	0.0219296	0.0198911	ADRA1A/ATP1B1/ATP2A2/ATP2A3/ATP2B4/CACNA1H/CASQ2/CHGA/CLIC2/CTNNA3/FXYD2/HDAC4/HRC/JAK2/KCNIP4/SCN1B/SCN5A/SLC8A1/TNNI3/TRPM4	20
BP	GO:0055119	relaxation of cardiac muscle	5/546	16/17913	8.53684e-05	0.0219296	0.0198911	ATP1B1/ATP2A2/CHGA/HRC/SLC8A1	5
BP	GO:1903522	regulation of blood circulation	22/546	292/17913	9.52036e-05	0.0230974	0.0209504	ADRA1A/ATP1B1/ATP2A2/ATP2A3/ATP2B4/CACNA1H/CASQ2/CHGA/CLIC2/CTNNA3/FXYD2/GHRL/HDAC4/HRC/JAK2/KCNIP4/KCNMB4/SCN1B/SCN5A/SLC8A1/TNNI3/TRPM4	22
BP	GO:0046578	regulation of Ras protein signal transduction	18/546	215/17913	0.000109164	0.0250906	0.0227582	ABR/ADRA1A/ARHGEF19/ARHGEF3/ARHGEF4/CYTH2/DENND1A/FGD4/JAK2/MAP4K4/MMD2/NRG1/NRP1/RASA3/TIAM1/TIMP2/VAV2/VAV3	18
BP	GO:0061298	retina vasculature development in camera-type eye	5/546	17/17913	0.000117918	0.0257473	0.0233539	COL4A1/LRP5/NDP/NRP1/PDGFRA	5
BP	GO:0030073	insulin secretion	17/546	200/17913	0.000140019	0.0272379	0.0247059	CACNA1A/CAMK2G/CPT1A/CRH/DOC2B/DPP4/FFAR1/GHRL/GHSR/GIPR/JAK2/MAP4K4/MYO5A/NR1H4/PTPRN2/TIAM1/TRPM4	17
BP	GO:0007389	pattern specification process	27/546	408/17913	0.00014534	0.0272379	0.0247059	ARMC4/BMP7/CELSR1/FGF1/GATA5/GBX2/HOXA3/HOXA9/HOXD11/HOXD9/IFT140/IRX1/IRX2/KDM2B/LMX1B/NRP1/NRP2/OTX2/PAX6/PITX2/SIX2/SMAD3/TBX20/TGFBR2/TP63/TTC21B/WNT3	27
BP	GO:0006937	regulation of muscle contraction	15/546	164/17913	0.000152704	0.0272379	0.0247059	ADRA1A/ATP1B1/ATP2A2/CASQ2/CHGA/CLIC2/CTNNA3/GHRL/GHSR/HDAC4/HRC/SCN5A/SLC8A1/TNNI3/TRPM4	15
BP	GO:0061299	retina vasculature morphogenesis in camera-type eye	4/546	10/17913	0.000154873	0.0272379	0.0247059	COL4A1/LRP5/NDP/NRP1	4
BP	GO:0007265	Ras protein signal transduction	23/546	324/17913	0.000161957	0.0272379	0.0247059	ABR/ADRA1A/ARHGAP6/ARHGEF19/ARHGEF3/ARHGEF4/CELSR1/CYTH2/DENND1A/FGD4/JAK2/MAP4K4/MMD2/NRG1/NRP1/PHACTR4/RASA3/RHOU/RTKN/TIAM1/TIMP2/VAV2/VAV3	23
BP	GO:0023061	signal release	28/546	433/17913	0.000162168	0.0272379	0.0247059	ADRA1A/ATP2A2/CACNA1A/CAMK2G/CPT1A/CRH/DOC2B/DPP4/FFAR1/GALR1/GHRL/GHSR/GIPR/JAK2/KCNMB4/MAP4K4/MYO5A/NR1H4/OPRM1/PPP1R9A/PTPRN2/RAB11FIP1/RIMS4/SCG5/SLC32A1/SYT1/TIAM1/TRPM4	28
BP	GO:0060048	cardiac muscle contraction	13/546	132/17913	0.000199878	0.0323284	0.0293232	ADRA1A/ATP1B1/CASQ2/CHGA/CLIC2/CTNNA3/HDAC4/HRC/SCN1B/SCN5A/SLC8A1/TNNI3/TRPM4	13
BP	GO:0098659	inorganic cation import across plasma membrane	7/546	41/17913	0.000214914	0.0323631	0.0293547	ATP1B1/ATP2B4/FXYD2/HCN2/SLC8A1/SLC9A3/TRPM4	7
BP	GO:0099587	inorganic ion import across plasma membrane	7/546	41/17913	0.000214914	0.0323631	0.0293547	ATP1B1/ATP2B4/FXYD2/HCN2/SLC8A1/SLC9A3/TRPM4	7
BP	GO:1902476	chloride transmembrane transport	9/546	70/17913	0.000264316	0.0378362	0.034319	CLCN7/CLIC2/GABRB3/GABRR2/GLRA1/SLC17A7/SLC1A4/SLC26A10/TTYH1	9
BP	GO:0060041	retina development in camera-type eye	13/546	136/17913	0.000268801	0.0378362	0.034319	ATP2B4/ATP8A2/COL4A1/GPM6A/IFT140/LRP5/MEGF11/NDP/NRP1/PAX6/PDGFRA/SDK1/SLC17A7	13
BP	GO:0086065	cell communication involved in cardiac conduction	8/546	56/17913	0.000277252	0.0378362	0.034319	ATP1B1/CASQ2/CTNNA3/HRC/SCN1B/SCN5A/SLC8A1/TRPM4	8
BP	GO:0060047	heart contraction	20/546	275/17913	0.000311051	0.0411625	0.0373361	ADRA1A/ATP1B1/ATP2A2/ATP2A3/ATP2B4/CACNA1H/CASQ2/CHGA/CLIC2/CTNNA3/FXYD2/HDAC4/HRC/JAK2/KCNIP4/SCN1B/SCN5A/SLC8A1/TNNI3/TRPM4	20
BP	GO:0048483	autonomic nervous system development	7/546	44/17913	0.000338533	0.0434816	0.0394397	ADARB1/GBX2/NAV2/NRP1/NRP2/PHACTR4/TP63	7
BP	GO:0070838	divalent metal ion transport	28/546	454/17913	0.000351341	0.043647	0.0395897	ADRA1A/ATP1B1/ATP2A2/ATP2A3/ATP2B4/CACNA1A/CACNA1H/CAMK2G/CASQ2/CLIC2/CRH/FFAR1/GJA4/GPM6A/GRIN2C/HOXA3/HRC/MYO5A/NIPA2/OPRM1/RASA3/RCVRN/SLC11A1/SLC8A1/TMEM163/TMEM37/TRPC3/TRPM4	28
BP	GO:1903779	regulation of cardiac conduction	9/546	73/17913	0.000363981	0.043647	0.0395897	ATP1B1/ATP2A2/ATP2A3/ATP2B4/CASQ2/FXYD2/HRC/SLC8A1/TRPM4	9
BP	GO:0007266	Rho protein signal transduction	14/546	159/17913	0.000371549	0.043647	0.0395897	ABR/ADRA1A/ARHGAP6/ARHGEF19/ARHGEF3/ARHGEF4/CELSR1/FGD4/NRP1/PHACTR4/RTKN/TIAM1/VAV2/VAV3	14
BP	GO:0001508	action potential	12/546	123/17913	0.0003798	0.043647	0.0395897	ADRA1A/ATP1B1/ATP2A2/CTNNA3/GLRA1/HCN2/KCNMB4/NRCAM/SCN1B/SCN5A/SLC8A1/TRPM4	12
BP	GO:0072511	divalent inorganic cation transport	28/546	458/17913	0.000404098	0.0452486	0.0410424	ADRA1A/ATP1B1/ATP2A2/ATP2A3/ATP2B4/CACNA1A/CACNA1H/CAMK2G/CASQ2/CLIC2/CRH/FFAR1/GJA4/GPM6A/GRIN2C/HOXA3/HRC/MYO5A/NIPA2/OPRM1/RASA3/RCVRN/SLC11A1/SLC8A1/TMEM163/TMEM37/TRPC3/TRPM4	28
BP	GO:0042755	eating behavior	6/546	33/17913	0.000428519	0.0467835	0.0424346	ATP8A2/CPT1A/GHRL/GHSR/OPRM1/STAT3	6
BP	GO:0060333	interferon-gamma-mediated signaling pathway	10/546	91/17913	0.000447589	0.0476737	0.043242	CAMK2G/HLA-DPA1/HLA-DPB1/HLA-DQB1/HLA-DQB2/HLA-DRB1/HLA-DRB5/JAK2/NCAM1/STAT1	10
BP	GO:0061337	cardiac conduction	13/546	144/17913	0.000468925	0.0478074	0.0433633	ATP1B1/ATP2A2/ATP2A3/ATP2B4/CASQ2/CTNNA3/FXYD2/HRC/KCNIP4/SCN1B/SCN5A/SLC8A1/TRPM4	13
BP	GO:0003015	heart process	20/546	284/17913	0.000470739	0.0478074	0.0433633	ADRA1A/ATP1B1/ATP2A2/ATP2A3/ATP2B4/CACNA1H/CASQ2/CHGA/CLIC2/CTNNA3/FXYD2/HDAC4/HRC/JAK2/KCNIP4/SCN1B/SCN5A/SLC8A1/TNNI3/TRPM4	20
BP	GO:0006821	chloride transport	10/546	92/17913	0.000488755	0.047908	0.0434546	ANO8/CLCN7/CLIC2/GABRB3/GABRR2/GLRA1/SLC17A7/SLC1A4/SLC26A10/TTYH1	10
BP	GO:0048593	camera-type eye morphogenesis	11/546	109/17913	0.000493671	0.047908	0.0434546	ATP8A2/BMP7/FAT1/FOXF2/KDM2B/LRP5/MEGF11/PAX6/PHACTR4/PITX2/SDK1	11
BP	GO:0098656	anion transmembrane transport	17/546	224/17913	0.000531116	0.0481365	0.0436618	CLCN7/CLIC2/CPT1A/GABRB3/GABRR2/GLRA1/PRKAG2/SLC17A7/SLC1A4/SLC26A10/SLC6A18/SLC6A19/SLC7A1/SLC7A5/STK39/TTYH1/VDAC2	17
BP	GO:0035725	sodium ion transmembrane transport	11/546	110/17913	0.000533775	0.0481365	0.0436618	ATP1B1/ATP2B4/FXYD2/HCN2/SCN1B/SCN5A/SLC17A7/SLC8A1/SLC9A3/STK39/TRPM4	11
BP	GO:0048705	skeletal system morphogenesis	16/546	204/17913	0.000536455	0.0481365	0.0436618	BMP7/CSGALNACT1/FGF18/FGF6/FOXN3/HOXA5/HOXD9/IFT140/LRP5/MEF2D/PDGFRA/SIX2/SMAD3/TBX15/TBX4/TGFBR2	16
BP	GO:0051953	negative regulation of amine transport	5/546	23/17913	0.000551139	0.0481365	0.0436618	CHGA/CRH/GHSR/GRM7/STK39	5
BP	GO:0086012	membrane depolarization during cardiac muscle cell action potential	5/546	23/17913	0.000551139	0.0481365	0.0436618	HCN2/SCN1B/SCN5A/SLC8A1/TRPM4	5
CC	GO:0042613	MHC class II protein complex	7/567	16/18678	2.06419e-07	0.000100113	8.01776e-05	CD74/HLA-DPA1/HLA-DPB1/HLA-DQB1/HLA-DQB2/HLA-DRB1/HLA-DRB5	7
CC	GO:0030666	endocytic vesicle membrane	19/567	161/18678	4.54707e-07	0.000110267	8.8309e-05	CAMK2G/CD74/DMBT1/HLA-DPA1/HLA-DPB1/HLA-DQB1/HLA-DQB2/HLA-DRB1/HLA-DRB5/LDLR/RAB10/RAB11FIP1/RAB7A/SLC11A1/STAB2/TAP1/TBC1D5/WASL/WNT3	19
CC	GO:0030665	clathrin-coated vesicle membrane	15/567	110/18678	1.17306e-06	0.000189644	0.00015188	CD3G/CD74/DENND1A/HLA-DPA1/HLA-DPB1/HLA-DQB1/HLA-DQB2/HLA-DRB1/HLA-DRB5/KIAA0319/LDLR/SLC17A7/SLC32A1/SYT1/TBC1D5	15
CC	GO:0030669	clathrin-coated endocytic vesicle membrane	9/567	40/18678	2.42378e-06	0.000293883	0.000235362	CD74/HLA-DPA1/HLA-DPB1/HLA-DQB1/HLA-DQB2/HLA-DRB1/HLA-DRB5/LDLR/TBC1D5	9
CC	GO:0042611	MHC protein complex	7/567	25/18678	6.8358e-06	0.000663072	0.000531034	CD74/HLA-DPA1/HLA-DPB1/HLA-DQB1/HLA-DQB2/HLA-DRB1/HLA-DRB5	7
CC	GO:0071556	integral component of lumenal side of endoplasmic reticulum membrane	7/567	29/18678	1.99721e-05	0.00121622	0.000974029	CD74/HLA-DPA1/HLA-DPB1/HLA-DQB1/HLA-DQB2/HLA-DRB1/HLA-DRB5	7
CC	GO:0098553	lumenal side of endoplasmic reticulum membrane	7/567	29/18678	1.99721e-05	0.00121622	0.000974029	CD74/HLA-DPA1/HLA-DPB1/HLA-DQB1/HLA-DQB2/HLA-DRB1/HLA-DRB5	7
CC	GO:0098797	plasma membrane protein complex	31/567	451/18678	2.17211e-05	0.00121622	0.000974029	ATP1B1/CACNA1A/CATSPERB/CD3G/CD74/FXYD2/GJA4/GRIN2C/HCN2/HLA-DPA1/HLA-DPB1/HLA-DQB1/HLA-DQB2/HLA-DRB1/HLA-DRB5/IGF1R/ITGA1/ITGA2B/KCNA6/KCNG3/KCNIP4/KCNMA1/KCNMB4/LRP5/LRRC26/NCF4/SCN1B/SCN5A/SHANK2/SNTG2/TBC1D5	31
CC	GO:0017053	transcriptional repressor complex	11/567	78/18678	2.2569e-05	0.00121622	0.000974029	CBX5/CHD3/CHD5/CTBP1/GFI1/HDAC4/NCOR2/PRDM16/TBL1X/TBX15/ZFPM1	11
CC	GO:1902495	transmembrane transporter complex	22/567	271/18678	2.96148e-05	0.00143632	0.0011503	ATP1B1/CACNA1A/CASQ2/CATSPERB/CLIC2/FXYD2/GABRB3/GABRR2/GLRA1/GRIN2C/HCN2/KCNA6/KCNG3/KCNIP4/KCNMA1/KCNMB4/LRRC26/SCN1B/SCN5A/SHANK2/TRPM4/TTYH1	22
CC	GO:1990351	transporter complex	22/567	276/18678	3.90947e-05	0.00168635	0.00135054	ATP1B1/CACNA1A/CASQ2/CATSPERB/CLIC2/FXYD2/GABRB3/GABRR2/GLRA1/GRIN2C/HCN2/KCNA6/KCNG3/KCNIP4/KCNMA1/KCNMB4/LRRC26/SCN1B/SCN5A/SHANK2/TRPM4/TTYH1	22
CC	GO:0098552	side of membrane	26/567	359/18678	4.17241e-05	0.00168635	0.00135054	ANK1/ANTXR1/ASTN1/ATP2A2/CD74/ENOX1/ENPEP/F3/GLRA1/HLA-DPA1/HLA-DPB1/HLA-DQB1/HLA-DQB2/HLA-DRB1/HLA-DRB5/IL1RL1/ITGA1/ITGA2B/LDLR/NCAM1/NRCAM/PDGFRA/RASA3/STAB2/TGFBR2/TIAM1	26
CC	GO:0030175	filopodium	12/567	99/18678	4.55326e-05	0.00169872	0.00136045	ANTXR1/EPHA4/FAT1/FGD4/GPM6A/MAP2/MYO5A/PPP1R9A/SYNE2/TBC1D10C/TTYH1/UNC5C	12
CC	GO:0045334	clathrin-coated endocytic vesicle	9/567	59/18678	6.67033e-05	0.00231079	0.00185064	CD74/HLA-DPA1/HLA-DPB1/HLA-DQB1/HLA-DQB2/HLA-DRB1/HLA-DRB5/LDLR/TBC1D5	9
CC	GO:0034702	ion channel complex	20/567	249/18678	7.8187e-05	0.00252805	0.00202463	CACNA1A/CASQ2/CATSPERB/CLIC2/GABRB3/GABRR2/GLRA1/GRIN2C/HCN2/KCNA6/KCNG3/KCNIP4/KCNMA1/KCNMB4/LRRC26/SCN1B/SCN5A/SHANK2/TRPM4/TTYH1	20
CC	GO:0030018	Z disc	12/567	106/18678	8.94558e-05	0.00271163	0.00217166	ADRA1A/ANK1/ATP2B4/CASQ2/FBXO32/HDAC4/HRC/PALLD/SCN5A/SLC8A1/SYNE2/SYNPO2	12
CC	GO:0030136	clathrin-coated vesicle	16/567	182/18678	0.000141797	0.00404539	0.00323982	ASTN1/CD3G/CD74/DENND1A/HLA-DPA1/HLA-DPB1/HLA-DQB1/HLA-DQB2/HLA-DRB1/HLA-DRB5/KIAA0319/LDLR/SLC17A7/SLC32A1/SYT1/TBC1D5	16
CC	GO:0030426	growth cone	15/567	166/18678	0.000167734	0.00440904	0.00353106	CYTH2/EPHA4/GPM6A/MAP2/MAPK8IP3/MYO5A/NRP1/OTX2/PALLD/PARD3/PPP1R9A/SHANK2/TIAM1/TIMP2/UNC5C	15
CC	GO:0030427	site of polarized growth	15/567	169/18678	0.000204351	0.00440904	0.00353106	CYTH2/EPHA4/GPM6A/MAP2/MAPK8IP3/MYO5A/NRP1/OTX2/PALLD/PARD3/PPP1R9A/SHANK2/TIAM1/TIMP2/UNC5C	15
CC	GO:0030662	coated vesicle membrane	15/567	169/18678	0.000204351	0.00440904	0.00353106	CD3G/CD74/DENND1A/HLA-DPA1/HLA-DPB1/HLA-DQB1/HLA-DQB2/HLA-DRB1/HLA-DRB5/KIAA0319/LDLR/SLC17A7/SLC32A1/SYT1/TBC1D5	15
CC	GO:0098978	glutamatergic synapse	24/567	352/18678	0.000204643	0.00440904	0.00353106	ABR/ADRA1A/AP3D1/ATP2B4/CTBP1/EPHA4/FRMPD4/GHRL/GHSR/GPC6/GPM6A/GRIN2C/JAK2/MYO5A/NLGN4Y/NRCAM/NRG1/NRP1/NRP2/PPP1R9A/SHISA6/STAT3/SYT1/TIAM1	24
CC	GO:0031674	I band	12/567	116/18678	0.000212562	0.00440904	0.00353106	ADRA1A/ANK1/ATP2B4/CASQ2/FBXO32/HDAC4/HRC/PALLD/SCN5A/SLC8A1/SYNE2/SYNPO2	12
CC	GO:0030139	endocytic vesicle	21/567	289/18678	0.00021386	0.00440904	0.00353106	CAMK2G/CD74/DMBT1/DPP4/HLA-DPA1/HLA-DPB1/HLA-DQB1/HLA-DQB2/HLA-DRB1/HLA-DRB5/LDLR/NCF4/RAB10/RAB11FIP1/RAB7A/SLC11A1/STAB2/TAP1/TBC1D5/WASL/WNT3	21
CC	GO:0033267	axon part	24/567	354/18678	0.000222641	0.00440904	0.00353106	ANK1/AP3D1/CRH/CYTH2/EPHA4/GLRA1/GPM6A/KCNA6/MAP2/MAPK8IP3/MYO5A/NRCAM/NRP1/OTX2/PALLD/PARD3/PPP1R9A/PTPRN2/SCN1B/SHANK2/SLC32A1/TIAM1/TIMP2/UNC5C	24
CC	GO:0043292	contractile fiber	17/567	209/18678	0.00022727	0.00440904	0.00353106	ADRA1A/ANK1/ATP2B4/CASQ2/FBXO32/HDAC4/HRC/MYH11/MYOD1/PALLD/SCN5A/SLC8A1/SVIL/SYNE2/SYNPO2/TMOD1/TNNI3	17
CC	GO:0031012	extracellular matrix	29/567	468/18678	0.000241526	0.00450538	0.00360822	ADAM19/ADAMTS2/ADAMTS9/BMP7/COL18A1/COL23A1/COL4A1/COL4A2/DEFA1B/EGFL7/F3/FGF1/GPC6/HAPLN1/HPSE2/IL7/LTBP1/MXRA7/NAV2/NCAM1/NDP/PI3/RARRES2/SMOC2/SPON1/THBS2/TIMP2/TNXB/WNT3	29
CC	GO:0044449	contractile fiber part	16/567	192/18678	0.000262101	0.0047081	0.00377057	ADRA1A/ANK1/ATP2B4/CASQ2/FBXO32/HDAC4/HRC/MYH11/PALLD/SCN5A/SLC8A1/SVIL/SYNE2/SYNPO2/TMOD1/TNNI3	16
CC	GO:0030016	myofibril	16/567	197/18678	0.000350033	0.00606307	0.00485572	ADRA1A/ANK1/ATP2B4/CASQ2/FBXO32/HDAC4/HRC/MYOD1/PALLD/SCN5A/SLC8A1/SVIL/SYNE2/SYNPO2/TMOD1/TNNI3	16
CC	GO:0009897	external side of plasma membrane	16/567	199/18678	0.000391747	0.00655162	0.00524699	ANTXR1/ASTN1/CD74/ENOX1/ENPEP/F3/GLRA1/IL1RL1/ITGA1/ITGA2B/LDLR/NCAM1/NRCAM/PDGFRA/STAB2/TGFBR2	16
CC	GO:0150034	distal axon	19/567	262/18678	0.000431714	0.00697938	0.00558956	CYTH2/EPHA4/GLRA1/GPM6A/KCNA6/MAP2/MAPK8IP3/MYO5A/NRP1/OTX2/PALLD/PARD3/PPP1R9A/PTPRN2/SHANK2/SLC32A1/TIAM1/TIMP2/UNC5C	19
CC	GO:0062023	collagen-containing extracellular matrix	25/567	399/18678	0.000541371	0.00846983	0.00678322	ADAM19/ADAMTS2/ADAMTS9/BMP7/COL18A1/COL23A1/COL4A1/COL4A2/DEFA1B/EGFL7/F3/GPC6/HAPLN1/IL7/LTBP1/MXRA7/NAV2/NCAM1/NDP/RARRES2/SMOC2/SPON1/THBS2/TIMP2/TNXB	25
CC	GO:0000118	histone deacetylase complex	7/567	48/18678	0.000572188	0.00867223	0.00694531	CBX5/CHD3/CHD5/HDAC4/MECOM/RERE/TBL1X	7
CC	GO:0030658	transport vesicle membrane	15/567	188/18678	0.000638293	0.00938097	0.00751292	CD74/CHGA/HLA-DPA1/HLA-DPB1/HLA-DQB1/HLA-DQB2/HLA-DRB1/HLA-DRB5/PTPRN2/SLC10A4/SLC17A7/SLC32A1/SYT1/TMEM163/TMEM184A	15
CC	GO:0030027	lamellipodium	15/567	191/18678	0.000751945	0.0104805	0.00839348	AMOTL1/ANTXR1/CDC42BPB/CTNNA3/DPP4/DUSP22/FAT1/FGD4/PALLD/PHACTR4/PPP1R9A/SNX1/SYNE2/UNC5C/WASL	15
CC	GO:0099699	integral component of synaptic membrane	13/567	152/18678	0.000756323	0.0104805	0.00839348	ADRA1A/ATP2B4/EPHA4/GHSR/GLRA1/GPM6A/NRCAM/NRP1/NRP2/OPRM1/PTPRA/SHISA6/SLC8A1	13
CC	GO:0005765	lysosomal membrane	22/567	344/18678	0.000875314	0.0112457	0.00900635	AP3D1/ATP11A/ATP6V1G1/CD74/CLCN7/DPP4/ENPEP/GDAP2/HLA-DPA1/HLA-DPB1/HLA-DQB1/HLA-DQB2/HLA-DRB1/HLA-DRB5/LAPTM4B/LDLR/NPC1/OCA2/RAB7A/RPTOR/TMEM63A/UBXN6	22
CC	GO:0098852	lytic vacuole membrane	22/567	344/18678	0.000875314	0.0112457	0.00900635	AP3D1/ATP11A/ATP6V1G1/CD74/CLCN7/DPP4/ENPEP/GDAP2/HLA-DPA1/HLA-DPB1/HLA-DQB1/HLA-DQB2/HLA-DRB1/HLA-DRB5/LAPTM4B/LDLR/NPC1/OCA2/RAB7A/RPTOR/TMEM63A/UBXN6	22
CC	GO:0030017	sarcomere	14/567	174/18678	0.000881109	0.0112457	0.00900635	ADRA1A/ANK1/ATP2B4/CASQ2/FBXO32/HDAC4/HRC/PALLD/SCN5A/SLC8A1/SYNE2/SYNPO2/TMOD1/TNNI3	14
CC	GO:0016529	sarcoplasmic reticulum	8/567	67/18678	0.000926754	0.011525	0.00923002	ANK1/ART1/ATP2A2/ATP2A3/CAMK2G/CASQ2/HRC/SYNE2	8
CC	GO:0005912	adherens junction	28/567	496/18678	0.00130052	0.0155412	0.0124464	AFAP1/ATP2A2/CD81/CTNNA3/CYTH2/DPP4/ESAM/FAT1/FRMD4A/ITGA1/ITGA2B/JAK2/LMLN/LPP/MAP4K4/NRP1/OPRM1/PALLD/PLEKHA7/RAB10/RHOU/SVIL/SYNE2/SYNPO2/TBCD/UBOX5/XIRP1/YWHAG	28
CC	GO:0012507	ER to Golgi transport vesicle membrane	7/567	55/18678	0.00131379	0.0155412	0.0124464	CD74/HLA-DPA1/HLA-DPB1/HLA-DQB1/HLA-DQB2/HLA-DRB1/HLA-DRB5	7
CC	GO:0034703	cation channel complex	14/567	182/18678	0.0013595	0.015699	0.0125728	CACNA1A/CASQ2/CATSPERB/GRIN2C/HCN2/KCNA6/KCNG3/KCNIP4/KCNMA1/KCNMB4/LRRC26/SCN1B/SCN5A/TRPM4	14
CC	GO:0005774	vacuolar membrane	23/567	382/18678	0.00150587	0.0167719	0.0134321	AP3D1/ATP11A/ATP6V1G1/CD74/CLCN7/DPP4/ENPEP/GDAP2/HLA-DPA1/HLA-DPB1/HLA-DQB1/HLA-DQB2/HLA-DRB1/HLA-DRB5/LAPTM4B/LDLR/NPC1/OCA2/RAB7A/RPTOR/TMEM138/TMEM63A/UBXN6	23
CC	GO:0099240	intrinsic component of synaptic membrane	13/567	164/18678	0.00152157	0.0167719	0.0134321	ADRA1A/ATP2B4/EPHA4/GHSR/GLRA1/GPM6A/NRCAM/NRP1/NRP2/OPRM1/PTPRA/SHISA6/SLC8A1	13
CC	GO:0031527	filopodium membrane	4/567	18/18678	0.0018315	0.0197395	0.0158087	ANTXR1/SYNE2/TBC1D10C/TTYH1	4
CC	GO:0016528	sarcoplasm	8/567	76/18678	0.00211306	0.022279	0.0178425	ANK1/ART1/ATP2A2/ATP2A3/CAMK2G/CASQ2/HRC/SYNE2	8
CC	GO:0048786	presynaptic active zone	7/567	60/18678	0.00219548	0.0226555	0.0181441	ATP2B4/CTBP1/GPM6A/GRM7/RIMS4/SLC17A7/SLC32A1	7
CC	GO:0097060	synaptic membrane	23/567	395/18678	0.00231078	0.0233485	0.0186991	ADRA1A/ANK1/ATP2B4/DENND1A/EPHA4/GABRB3/GABRR2/GHSR/GLRA1/GPM6A/GRM7/NLGN4Y/NRCAM/NRP1/NRP2/OPRM1/PTPRA/RIMS4/SHANK2/SHISA6/SLC8A1/SYT1/TIAM1	23
CC	GO:0030135	coated vesicle	17/567	261/18678	0.00268686	0.0262068	0.0209882	ACTR1A/ASTN1/CD3G/CD74/DENND1A/HLA-DPA1/HLA-DPB1/HLA-DQB1/HLA-DQB2/HLA-DRB1/HLA-DRB5/KIAA0319/LDLR/SLC17A7/SLC32A1/SYT1/TBC1D5	17
CC	GO:0005901	caveola	8/567	79/18678	0.00270173	0.0262068	0.0209882	ADRA1A/ATP1B1/ATP2B4/JAK2/KCNMA1/MLC1/SCN5A/TGFBR2	8
CC	GO:0098858	actin-based cell projection	14/567	200/18678	0.00325848	0.0309875	0.0248169	ANTXR1/EPHA4/FAT1/FCHSD2/FGD4/GPM6A/MAP2/MYO5A/PDGFRA/PPP1R9A/SYNE2/TBC1D10C/TTYH1/UNC5C	14
CC	GO:0031252	cell leading edge	22/567	384/18678	0.00345812	0.0318109	0.0254763	AMOTL1/ANK1/ANTXR1/ARHGEF4/BMX/CDC42BPB/CDK6/CTNNA3/DPP4/DUSP22/FAT1/FGD4/MYO5A/OPRM1/PALLD/PHACTR4/PPP1R9A/SNX1/SYNE2/TIAM1/UNC5C/WASL	22
CC	GO:0044304	main axon	7/567	65/18678	0.00347624	0.0318109	0.0254763	ANK1/CRH/MAP2/NRCAM/PARD3/SCN1B/TIAM1	7
CC	GO:0010008	endosome membrane	25/567	464/18678	0.00423391	0.0380268	0.0304544	ANTXR1/AP3D1/EPHA4/HLA-DPA1/HLA-DPB1/HLA-DQB1/HLA-DQB2/HLA-DRB1/HLA-DRB5/KIAA0319/LAPTM4B/LDLR/NCF4/NPC1/OCA2/RAB10/RAB7A/SLC11A1/SNX1/STAM/TBC1D5/TMEM163/TMEM184A/UBXN6/ZFYVE28	25
CC	GO:0033017	sarcoplasmic reticulum membrane	5/567	36/18678	0.0043849	0.0386669	0.0309671	ART1/ATP2A2/CAMK2G/CASQ2/SYNE2	5
CC	GO:0042383	sarcolemma	10/567	125/18678	0.00481046	0.0413309	0.0331006	ADRA1A/ANK1/ATP1B1/ATP2B4/FGF6/OPRM1/SCN1B/SCN5A/SLC8A1/SNTG2	10
CC	GO:0030134	COPII-coated ER to Golgi transport vesicle	7/567	69/18678	0.00485744	0.0413309	0.0331006	CD74/HLA-DPA1/HLA-DPB1/HLA-DQB1/HLA-DQB2/HLA-DRB1/HLA-DRB5	7
CC	GO:0060198	clathrin-sculpted vesicle	3/567	12/18678	0.00498826	0.0417122	0.033406	SLC17A7/SLC32A1/SYT1	3
MF	GO:0046873	metal ion transmembrane transporter activity	32/537	337/16969	3.28884e-08	2.04894e-05	1.72058e-05	ATP1B1/ATP2A2/ATP2B4/CACNA1A/CACNA1H/FXYD2/GPM6A/GRIN2C/HCN2/KCNA6/KCNG3/KCNIP4/KCNK5/KCNMA1/KCNMB4/LRRC26/NIPA2/OPRM1/RASA3/SCN1B/SCN5A/SLC11A1/SLC17A7/SLC22A3/SLC6A18/SLC6A19/SLC8A1/SLC9A3/TMEM37/TRPC3/TRPM4/TTYH1	32
MF	GO:0008324	cation transmembrane transporter activity	37/537	484/16969	7.27576e-07	0.000225029	0.000188966	ATP1B1/ATP2A2/ATP2B4/CACNA1A/CACNA1H/FXYD2/GPM6A/GRIN2C/HCN2/KCNA6/KCNG3/KCNIP4/KCNK5/KCNMA1/KCNMB4/LRRC26/NIPA2/OCA2/OPRM1/RASA3/RHCG/SCN1B/SCN5A/SLC11A1/SLC17A7/SLC1A4/SLC22A3/SLC32A1/SLC45A4/SLC6A18/SLC6A19/SLC8A1/SLC9A3/TMEM37/TRPC3/TRPM4/TTYH1	37
MF	GO:0022839	ion gated channel activity	25/537	267/16969	1.37356e-06	0.000225029	0.000188966	ANO8/CACNA1A/CACNA1H/CLCN7/CLIC2/GABRB3/GABRR2/GLRA1/GRIN2C/HCN2/KCNA6/KCNG3/KCNIP4/KCNK5/KCNMA1/KCNMB4/LRRC26/OPRM1/RASA3/SCN1B/SCN5A/SLC17A7/TMEM37/TRPM4/VDAC2	25
MF	GO:0022836	gated channel activity	25/537	268/16969	1.4709e-06	0.000225029	0.000188966	ANO8/CACNA1A/CACNA1H/CLCN7/CLIC2/GABRB3/GABRR2/GLRA1/GRIN2C/HCN2/KCNA6/KCNG3/KCNIP4/KCNK5/KCNMA1/KCNMB4/LRRC26/OPRM1/RASA3/SCN1B/SCN5A/SLC17A7/TMEM37/TRPM4/VDAC2	25
MF	GO:0022890	inorganic cation transmembrane transporter activity	34/537	444/16969	1.9884e-06	0.000225029	0.000188966	ATP1B1/ATP2A2/ATP2B4/CACNA1A/CACNA1H/FXYD2/GPM6A/GRIN2C/HCN2/KCNA6/KCNG3/KCNIP4/KCNK5/KCNMA1/KCNMB4/LRRC26/NIPA2/OPRM1/RASA3/SCN1B/SCN5A/SLC11A1/SLC17A7/SLC22A3/SLC32A1/SLC45A4/SLC6A18/SLC6A19/SLC8A1/SLC9A3/TMEM37/TRPC3/TRPM4/TTYH1	34
MF	GO:0005216	ion channel activity	28/537	329/16969	2.16721e-06	0.000225029	0.000188966	ANO8/CACNA1A/CACNA1H/CLCN7/GABRB3/GABRR2/GLRA1/GPM6A/GRIN2C/HCN2/KCNA6/KCNG3/KCNIP4/KCNK5/KCNMA1/KCNMB4/LRRC26/OPRM1/RASA3/SCN1B/SCN5A/SLC17A7/SLC1A4/TMEM37/TRPC3/TRPM4/TTYH1/VDAC2	28
MF	GO:0022838	substrate-specific channel activity	28/537	338/16969	3.65483e-06	0.00032528	0.00027315	ANO8/CACNA1A/CACNA1H/CLCN7/GABRB3/GABRR2/GLRA1/GPM6A/GRIN2C/HCN2/KCNA6/KCNG3/KCNIP4/KCNK5/KCNMA1/KCNMB4/LRRC26/OPRM1/RASA3/SCN1B/SCN5A/SLC17A7/SLC1A4/TMEM37/TRPC3/TRPM4/TTYH1/VDAC2	28
MF	GO:0015267	channel activity	29/537	370/16969	7.24684e-06	0.000528362	0.000443687	ANO8/CACNA1A/CACNA1H/CLCN7/CLIC2/GABRB3/GABRR2/GLRA1/GPM6A/GRIN2C/HCN2/KCNA6/KCNG3/KCNIP4/KCNK5/KCNMA1/KCNMB4/LRRC26/OPRM1/RASA3/SCN1B/SCN5A/SLC17A7/SLC1A4/TMEM37/TRPC3/TRPM4/TTYH1/VDAC2	29
MF	GO:0022803	passive transmembrane transporter activity	29/537	371/16969	7.63284e-06	0.000528362	0.000443687	ANO8/CACNA1A/CACNA1H/CLCN7/CLIC2/GABRB3/GABRR2/GLRA1/GPM6A/GRIN2C/HCN2/KCNA6/KCNG3/KCNIP4/KCNK5/KCNMA1/KCNMB4/LRRC26/OPRM1/RASA3/SCN1B/SCN5A/SLC17A7/SLC1A4/TMEM37/TRPC3/TRPM4/TTYH1/VDAC2	29
MF	GO:0005244	voltage-gated ion channel activity	17/537	158/16969	1.10324e-05	0.000624837	0.000524701	CACNA1A/CACNA1H/CLCN7/CLIC2/GRIN2C/HCN2/KCNA6/KCNG3/KCNIP4/KCNK5/KCNMA1/LRRC26/OPRM1/SCN1B/SCN5A/TMEM37/VDAC2	17
MF	GO:0022832	voltage-gated channel activity	17/537	158/16969	1.10324e-05	0.000624837	0.000524701	CACNA1A/CACNA1H/CLCN7/CLIC2/GRIN2C/HCN2/KCNA6/KCNG3/KCNIP4/KCNK5/KCNMA1/LRRC26/OPRM1/SCN1B/SCN5A/TMEM37/VDAC2	17
MF	GO:0042605	peptide antigen binding	7/537	30/16969	3.30227e-05	0.00171443	0.00143967	HLA-DPA1/HLA-DPB1/HLA-DQB1/HLA-DRB1/HLA-DRB5/SLC7A5/TAP1	7
MF	GO:0015077	monovalent inorganic cation transmembrane transporter activity	21/537	266/16969	0.000118211	0.00533623	0.00448104	ATP1B1/FXYD2/HCN2/KCNA6/KCNG3/KCNIP4/KCNK5/KCNMA1/KCNMB4/LRRC26/SCN1B/SCN5A/SLC11A1/SLC17A7/SLC22A3/SLC32A1/SLC45A4/SLC6A18/SLC6A19/SLC8A1/SLC9A3	21
MF	GO:0015085	calcium ion transmembrane transporter activity	12/537	105/16969	0.000119915	0.00533623	0.00448104	ATP2A2/ATP2B4/CACNA1A/CACNA1H/GPM6A/GRIN2C/OPRM1/RASA3/SLC8A1/TMEM37/TRPC3/TRPM4	12
MF	GO:0005088	Ras guanyl-nucleotide exchange factor activity	13/537	125/16969	0.000166311	0.00690745	0.00580046	ABR/ARHGEF19/ARHGEF3/ARHGEF4/DENND1A/DOCK1/FGD4/RIN3/SH3BP5/ST5/TIAM1/VAV2/VAV3	13
MF	GO:0015171	amino acid transmembrane transporter activity	8/537	55/16969	0.000313722	0.0122155	0.0102579	OCA2/SLC17A7/SLC1A4/SLC32A1/SLC6A18/SLC6A19/SLC7A1/SLC7A5	8
MF	GO:0035259	glucocorticoid receptor binding	4/537	12/16969	0.000400915	0.0146924	0.0123378	FLT3/NCOR2/SMAD3/STAT3	4
MF	GO:0005253	anion channel activity	9/537	72/16969	0.000430007	0.014883	0.0124979	ANO8/CLCN7/GABRB3/GABRR2/GLRA1/SLC17A7/SLC1A4/TTYH1/VDAC2	9
MF	GO:0005089	Rho guanyl-nucleotide exchange factor activity	9/537	73/16969	0.00047698	0.0150739	0.0126582	ABR/ARHGEF19/ARHGEF3/ARHGEF4/DOCK1/FGD4/TIAM1/VAV2/VAV3	9
MF	GO:0005261	cation channel activity	19/537	254/16969	0.000483915	0.0150739	0.0126582	CACNA1A/CACNA1H/GPM6A/GRIN2C/HCN2/KCNA6/KCNG3/KCNIP4/KCNK5/KCNMA1/KCNMB4/LRRC26/OPRM1/RASA3/SCN1B/SCN5A/TMEM37/TRPC3/TRPM4	19
MF	GO:0015108	chloride transmembrane transporter activity	9/537	75/16969	0.000583593	0.0173133	0.0145386	ANO8/CLCN7/GABRB3/GABRR2/GLRA1/SLC17A7/SLC1A4/SLC22A3/TTYH1	9
MF	GO:0005254	chloride channel activity	8/537	61/16969	0.000642883	0.0182053	0.0152877	ANO8/CLCN7/GABRB3/GABRR2/GLRA1/SLC17A7/SLC1A4/TTYH1	8
MF	GO:0033613	activating transcription factor binding	8/537	64/16969	0.000889564	0.0240956	0.020234	HDAC4/MEF2D/PITX2/POU1F1/PRDM16/SMAD3/TBX20/ZFPM1	8
MF	GO:0005104	fibroblast growth factor receptor binding	5/537	25/16969	0.000978828	0.0245923	0.0206512	FGF1/FGF17/FGF18/FGF22/FGF6	5
MF	GO:0019199	transmembrane receptor protein kinase activity	8/537	65/16969	0.000986851	0.0245923	0.0206512	EPHA4/FLT3/IGF1R/LTBP1/NRP1/NRP2/PDGFRA/TGFBR2	8
MF	GO:0015081	sodium ion transmembrane transporter activity	11/537	117/16969	0.0012121	0.0286309	0.0240425	ATP1B1/FXYD2/HCN2/SCN1B/SCN5A/SLC17A7/SLC22A3/SLC6A18/SLC6A19/SLC8A1/SLC9A3	11
MF	GO:0015103	inorganic anion transmembrane transporter activity	11/537	118/16969	0.00129952	0.0286309	0.0240425	ANO8/CLCN7/GABRB3/GABRR2/GLRA1/SLC17A7/SLC1A4/SLC22A3/SLC26A10/TTYH1/VDAC2	11
MF	GO:0023026	MHC class II protein complex binding	4/537	16/16969	0.00133274	0.0286309	0.0240425	ATP1B1/CD74/CD81/HLA-DRB1	4
MF	GO:0071837	HMG box domain binding	4/537	16/16969	0.00133274	0.0286309	0.0240425	HOXA3/HOXC4/PAX3/PAX6	4
MF	GO:0005085	guanyl-nucleotide exchange factor activity	15/537	196/16969	0.00146879	0.030502	0.0256137	ABR/ARHGEF19/ARHGEF3/ARHGEF4/CYTH2/DENND1A/DOCK1/DOCK9/FGD4/RIN3/SH3BP5/ST5/TIAM1/VAV2/VAV3	15
MF	GO:0070851	growth factor receptor binding	11/537	121/16969	0.00159335	0.0320212	0.0268895	FGF1/FGF17/FGF18/FGF22/FGF6/IL7/JAK2/PDGFRA/SNX1/VAV2/VAV3	11
MF	GO:0008509	anion transmembrane transporter activity	17/537	240/16969	0.0017036	0.0331669	0.0278516	ANO8/CLCN7/GABRB3/GABRR2/GLRA1/OCA2/SLC17A7/SLC1A4/SLC22A3/SLC26A10/SLC32A1/SLC6A18/SLC6A19/SLC7A1/SLC7A5/TTYH1/VDAC2	17
MF	GO:0022804	active transmembrane transporter activity	17/537	241/16969	0.00178073	0.0336181	0.0282305	ATP1B1/ATP2A2/ATP2B4/CLCN7/FXYD2/SLC11A1/SLC17A7/SLC1A4/SLC22A3/SLC26A10/SLC32A1/SLC45A4/SLC6A18/SLC6A19/SLC8A1/SLC9A3/TAP1	17
MF	GO:0022843	voltage-gated cation channel activity	10/537	106/16969	0.0019457	0.035618	0.0299098	CACNA1A/CACNA1H/GRIN2C/HCN2/KCNA6/KCNG3/KCNK5/KCNMA1/LRRC26/OPRM1	10
MF	GO:0005262	calcium channel activity	9/537	89/16969	0.00200101	0.035618	0.0299098	CACNA1A/CACNA1H/GPM6A/GRIN2C/OPRM1/RASA3/TMEM37/TRPC3/TRPM4	9
MF	GO:0001618	virus receptor activity	8/537	74/16969	0.00230091	0.0386325	0.0324413	CD80/CD81/CLEC5A/DPP4/HAVCR1/LDLR/NCAM1/NPC1	8
MF	GO:0104005	hijacked molecular function	8/537	74/16969	0.00230091	0.0386325	0.0324413	CD80/CD81/CLEC5A/DPP4/HAVCR1/LDLR/NCAM1/NPC1	8
MF	GO:0017048	Rho GTPase binding	12/537	146/16969	0.0023564	0.0386325	0.0324413	ABR/ARHGEF19/ARHGEF3/ARHGEF4/CDC42BPB/DOCK1/FGD4/INF2/RTKN/TIAM1/VAV2/VAV3	12
MF	GO:0015079	potassium ion transmembrane transporter activity	10/537	110/16969	0.00256157	0.0409194	0.0343617	ATP1B1/FXYD2/HCN2/KCNA6/KCNG3/KCNIP4/KCNK5/KCNMA1/KCNMB4/LRRC26	10
MF	GO:0000978	RNA polymerase II proximal promoter sequence-specific DNA binding	25/537	432/16969	0.00284484	0.0443084	0.0372076	AKNA/CREB3L4/ELK3/ETS1/HDAC4/HNRNPC/HOXA5/HOXA9/KDM2B/KLF5/MXD1/MYOD1/NEUROD6/NONO/OTX2/PAX6/POU1F1/SIX2/SMAD3/STAT1/STAT3/TBX15/TBX20/ZFPM1/ZNF536	25
MF	GO:0051427	hormone receptor binding	13/537	170/16969	0.00298639	0.0452435	0.0379927	BRCA1/CRH/FLT3/FOXP1/JAK2/KDM3A/MYOD1/NCOR2/NR1H4/SMAD3/STAT1/STAT3/TACC2	13
MF	GO:0032395	MHC class II receptor activity	3/537	10/16969	0.00320262	0.0452435	0.0379927	HLA-DPA1/HLA-DQB1/HLA-DQB2	3
MF	GO:0015662	ATPase activity, coupled to transmembrane movement of ions, phosphorylative mechanism	4/537	20/16969	0.00320916	0.0452435	0.0379927	ATP1B1/ATP2A2/ATP2B4/FXYD2	4
MF	GO:0030506	ankyrin binding	4/537	20/16969	0.00320916	0.0452435	0.0379927	NRCAM/RHCG/SCN5A/SLC8A1	4
MF	GO:0001228	DNA-binding transcription activator activity, RNA polymerase II-specific	23/537	390/16969	0.00326799	0.0452435	0.0379927	AKNA/ATF1/CREB3L4/ELK3/ESRRG/ETS1/FOXF2/HOXA5/HOXC4/KLF14/KLF5/MEF2D/MYOD1/NEUROD6/NR1H4/OTX2/PAX6/POU1F1/SIX2/SMAD3/STAT3/TBX20/TP63	23
MF	GO:0042277	peptide binding	15/537	215/16969	0.00358708	0.0485815	0.0407958	CACNA1A/CD74/EPHA4/FBXO2/GALR1/GHSR/HLA-DPA1/HLA-DPB1/HLA-DQB1/HLA-DRB1/HLA-DRB5/IGF1R/LDLR/SLC7A5/TAP1	15
KEGG	hsa04659	Th17 cell differentiation	12/244	107/7852	0.000111865	0.0167184	0.0143195	CD3G/HLA-DPA1/HLA-DPB1/HLA-DQB1/HLA-DRB1/HLA-DRB5/IL21R/JAK2/SMAD3/STAT1/STAT3/TGFBR2	12
KEGG	hsa05321	Inflammatory bowel disease (IBD)	9/244	65/7852	0.000163007	0.0167184	0.0143195	HLA-DPA1/HLA-DPB1/HLA-DQB1/HLA-DRB1/HLA-DRB5/IL21R/SMAD3/STAT1/STAT3	9
KEGG	hsa05150	Staphylococcus aureus infection	9/244	68/7852	0.00023173	0.0167184	0.0143195	CFD/DEFA1B/DEFA6/HLA-DPA1/HLA-DPB1/HLA-DQB1/HLA-DRB1/HLA-DRB5/MASP1	9
KEGG	hsa04024	cAMP signaling pathway	17/244	212/7852	0.000308182	0.0167184	0.0143195	ATP1B1/ATP2A2/ATP2B4/CAMK2G/CREB3L4/FXYD2/GHRL/GHSR/GIPR/GRIN2C/HCN2/PDE4C/SST/TIAM1/TNNI3/VAV2/VAV3	17
KEGG	hsa04940	Type I diabetes mellitus	7/244	43/7852	0.00031784	0.0167184	0.0143195	CD80/HLA-DPA1/HLA-DPB1/HLA-DQB1/HLA-DRB1/HLA-DRB5/PTPRN2	7
KEGG	hsa04974	Protein digestion and absorption	10/244	90/7852	0.00044971	0.0197123	0.0168839	ATP1B1/COL18A1/COL4A1/COL4A2/DPP4/FXYD2/KCNK5/SLC6A19/SLC8A1/SLC9A3	10
KEGG	hsa04151	PI3K-Akt signaling pathway	23/244	354/7852	0.000618924	0.0232539	0.0199173	BRCA1/CDK6/COL4A1/COL4A2/CREB3L4/FGF1/FGF17/FGF18/FGF22/FGF6/FLT3/GNG7/IGF1R/IL7/ITGA1/ITGA2B/JAK2/NTF3/PDGFRA/RPTOR/THBS2/TNXB/YWHAG	23
KEGG	hsa04640	Hematopoietic cell lineage	10/244	97/7852	0.000817702	0.026882	0.0230248	CD3G/FLT3/HLA-DPA1/HLA-DPB1/HLA-DQB1/HLA-DRB1/HLA-DRB5/IL7/ITGA1/ITGA2B	10
KEGG	hsa05330	Allograft rejection	6/244	38/7852	0.00101396	0.0296303	0.0253787	CD80/HLA-DPA1/HLA-DPB1/HLA-DQB1/HLA-DRB1/HLA-DRB5	6
KEGG	hsa05320	Autoimmune thyroid disease	7/244	53/7852	0.00116776	0.030712	0.0263053	CD80/HLA-DPA1/HLA-DPB1/HLA-DQB1/HLA-DRB1/HLA-DRB5/TPO	7
KEGG	hsa05033	Nicotine addiction	6/244	40/7852	0.00133858	0.0320043	0.0274121	CACNA1A/GABRB3/GABRR2/GRIN2C/SLC17A7/SLC32A1	6
KEGG	hsa05332	Graft-versus-host disease	6/244	41/7852	0.00152797	0.0334881	0.028683	CD80/HLA-DPA1/HLA-DPB1/HLA-DQB1/HLA-DRB1/HLA-DRB5	6
KEGG	hsa05218	Melanoma	8/244	72/7852	0.0016653	0.0336903	0.0288562	CDK6/FGF1/FGF17/FGF18/FGF22/FGF6/IGF1R/PDGFRA	8
KEGG	hsa05140	Leishmaniasis	8/244	74/7852	0.00198834	0.0373523	0.0319928	HLA-DPA1/HLA-DPB1/HLA-DQB1/HLA-DRB1/HLA-DRB5/JAK2/NCF4/STAT1	8
KEGG	hsa04658	Th1 and Th2 cell differentiation	9/244	92/7852	0.00214128	0.0375438	0.0321567	CD3G/HLA-DPA1/HLA-DPB1/HLA-DQB1/HLA-DRB1/HLA-DRB5/JAK2/MAML2/STAT1	9
KEGG	hsa05310	Asthma	5/244	31/7852	0.00243826	0.0382634	0.0327732	HLA-DPA1/HLA-DPB1/HLA-DQB1/HLA-DRB1/HLA-DRB5	5
KEGG	hsa04612	Antigen processing and presentation	8/244	77/7852	0.00256333	0.0382634	0.0327732	CD74/HLA-DPA1/HLA-DPB1/HLA-DQB1/HLA-DRB1/HLA-DRB5/HSPA1L/TAP1	8
KEGG	hsa05145	Toxoplasmosis	10/244	113/7852	0.00261879	0.0382634	0.0327732	HLA-DPA1/HLA-DPB1/HLA-DQB1/HLA-DRB1/HLA-DRB5/HSPA1L/JAK2/LDLR/STAT1/STAT3	10
DO	DOID:1827	idiopathic generalized epilepsy	5/315	20/8007	0.000868744	0.530561	0.525028	CACNA1A/CACNA1H/KCNMA1/NDP/SCN1B	5
DO	DOID:1826	epilepsy syndrome	17/315	201/8007	0.00235533	0.530561	0.525028	ALDH7A1/CACNA1A/CACNA1H/CRH/EPHX1/GABRB3/GHRL/HCN2/KCNMA1/KCNMB4/NDP/OPRM1/SCN1B/SCN5A/SYT1/TAP1/WASL	17
DO	DOID:1686	glaucoma	11/315	109/8007	0.00361178	0.530561	0.525028	ADAMTS17/CYP46A1/HLA-DQB1/HLA-DRB1/LDLR/LMX1B/NCK2/PITX2/TAP1/VAV2/VAV3	11
DO	DOID:657	adenoma	24/315	340/8007	0.00384991	0.530561	0.525028	BRCA1/CHGA/CSNK1D/CTBP1/DEFA6/DPP4/EPHX1/GHRL/GHSR/MAP2/MSH2/MYH11/NRCAM/PDGFRA/PELP1/POU1F1/SLC9A2/SLC9A3/SMAD3/STAT3/THBS2/TNXB/TP63/TPO	24
DO	DOID:7998	hyperthyroidism	10/315	96/8007	0.00432605	0.530561	0.525028	CASQ2/CD80/CHGA/HLA-DPB1/HLA-DQB1/HLA-DRB1/IGF1R/ST3GAL1/TAP1/TPO	10
DO	DOID:4051	alveolar rhabdomyosarcoma	3/315	10/8007	0.00588908	0.530561	0.525028	MYOD1/PAX3/PDGFRA	3
DO	DOID:0060084	cell type benign neoplasm	30/315	475/8007	0.0066358	0.530561	0.525028	ACTR1A/BRCA1/CHGA/CSNK1D/CTBP1/DEFA6/DPP4/EPHX1/FGF1/GHRL/GHSR/IGF1R/MAP2/MSH2/MYH11/NRCAM/NRP1/PDGFRA/PELP1/POU1F1/SLC7A5/SLC9A2/SLC9A3/SMAD3/STAT3/THBS2/TNXB/TP63/TPO/YWHAG	30
DO	DOID:1682	congenital heart disease	7/315	58/8007	0.00732384	0.530561	0.525028	ATP2A2/CACNA1H/F3/LPP/MYH11/PITX2/TBX20	7
DO	DOID:3744	cervical squamous cell carcinoma	8/315	73/8007	0.00762909	0.530561	0.525028	ATP2A2/ATP2A3/HLA-DQB1/HLA-DRB1/HPSE2/IRX1/MSH2/TP63	8
DO	DOID:5520	head and neck squamous cell carcinoma	14/315	174/8007	0.00855508	0.530561	0.525028	ART1/ATP2A2/ATP2A3/CLPTM1L/ENPEP/GALR1/IGF1R/IRX1/MSH2/STAT1/STAT3/TAP1/TP63/VAV2	14
DO	DOID:1067	open-angle glaucoma	7/315	61/8007	0.00961699	0.530561	0.525028	CYP46A1/HLA-DQB1/HLA-DRB1/LDLR/TAP1/VAV2/VAV3	7
DO	DOID:1542	head and neck carcinoma	17/315	235/8007	0.0111582	0.530561	0.525028	ART1/ATP2A2/ATP2A3/BRCA1/CLPTM1L/COL18A1/ENPEP/EPHX1/GALR1/IGF1R/IRX1/MSH2/STAT1/STAT3/TAP1/TP63/VAV2	17
DO	DOID:936	brain disease	28/315	454/8007	0.0116806	0.530561	0.525028	ALDH7A1/CACNA1A/CACNA1H/CHGA/CRH/EPHX1/GABRB3/GABRR2/GHRL/HCN2/HLA-DQB1/HLA-DRB1/KCNMA1/KCNMB4/LDLR/MLC1/NCAM1/NDP/NTF3/OPRM1/PROC/SCN1B/SCN5A/STAT1/SYT1/TAP1/TPH2/WASL	28
DO	DOID:13533	osteopetrosis	3/315	13/8007	0.0128585	0.530561	0.525028	CLCN7/LRP5/VAV3	3
DO	DOID:12361	Graves' disease	8/315	80/8007	0.0129978	0.530561	0.525028	CD80/HLA-DPB1/HLA-DQB1/HLA-DRB1/IGF1R/ST3GAL1/TAP1/TPO	8
DO	DOID:11934	head and neck cancer	17/315	239/8007	0.0130399	0.530561	0.525028	ART1/ATP2A2/ATP2A3/BRCA1/CLPTM1L/COL18A1/ENPEP/EPHX1/GALR1/IGF1R/IRX1/MSH2/STAT1/STAT3/TAP1/TP63/VAV2	17
DO	DOID:219	colon cancer	19/315	282/8007	0.0153073	0.536574	0.530978	ATP2A2/BMP7/CTBP1/DEFA6/DPP4/DPYD/FGF18/IGF1R/ITGA1/JAK2/LGALS2/MSH2/NRP1/PALLD/SNX1/STAT1/STAT3/TACSTD2/TGFBR2	19
DO	DOID:1019	osteomyelitis	3/315	14/8007	0.0158963	0.536574	0.530978	CLCN7/HLA-DQB1/HLA-DRB1	3
DO	DOID:11335	sarcoidosis	8/315	84/8007	0.0170924	0.536574	0.530978	BTNL2/CD80/HAVCR1/HLA-DQB1/HLA-DRB1/HSPA1L/SLC11A1/STAT1	8
DO	DOID:9256	colorectal cancer	19/315	287/8007	0.0181053	0.536574	0.530978	ATP2A2/BMP7/CTBP1/DEFA6/DPP4/DPYD/FGF18/IGF1R/ITGA1/JAK2/LGALS2/MSH2/NRP1/PALLD/SNX1/STAT1/STAT3/TACSTD2/TGFBR2	19
DO	DOID:6000	congestive heart failure	16/315	229/8007	0.01837	0.536574	0.530978	ADRA1A/ATP2A2/ATP2A3/CHGA/F3/FOXP1/GHRL/HDAC4/IL1RL1/IL7/MUC16/NRG1/SCN5A/STAT1/TNNI3/TRPC3	16
DO	DOID:5672	large intestine cancer	19/315	288/8007	0.0187098	0.536574	0.530978	ATP2A2/BMP7/CTBP1/DEFA6/DPP4/DPYD/FGF18/IGF1R/ITGA1/JAK2/LGALS2/MSH2/NRP1/PALLD/SNX1/STAT1/STAT3/TACSTD2/TGFBR2	19
DO	DOID:0060005	autoimmune disease of endocrine system	8/315	87/8007	0.0207207	0.536574	0.530978	CD80/HLA-DPB1/HLA-DQB1/HLA-DRB1/IGF1R/ST3GAL1/TAP1/TPO	8
DO	DOID:2893	cervix carcinoma	9/315	104/8007	0.0209411	0.536574	0.530978	ATP2A2/ATP2A3/HLA-DQB1/HLA-DRB1/HPSE2/IRX1/MSH2/PDGFRA/TP63	9
DO	DOID:2916	hypersensitivity reaction type IV disease	8/315	88/8007	0.0220431	0.536574	0.530978	BTNL2/CD80/HAVCR1/HLA-DQB1/HLA-DRB1/HSPA1L/SLC11A1/STAT1	8
DO	DOID:4362	cervical cancer	9/315	105/8007	0.0221432	0.536574	0.530978	ATP2A2/ATP2A3/HLA-DQB1/HLA-DRB1/HPSE2/IRX1/MSH2/PDGFRA/TP63	9
DO	DOID:13141	uveitis	4/315	28/8007	0.0228273	0.536574	0.530978	ESD/HLA-DQB1/HLA-DRB1/HSPA1L	4
DO	DOID:3265	chronic granulomatous disease	3/315	16/8007	0.0230785	0.536574	0.530978	MECOM/NCF4/PRDM16	3
DO	DOID:11983	Prader-Willi syndrome	3/315	17/8007	0.0272258	0.591349	0.585182	GHRL/NIPA2/SNRPN	3
DO	DOID:10155	intestinal cancer	19/315	300/8007	0.0272511	0.591349	0.585182	ATP2A2/BMP7/CTBP1/DEFA6/DPP4/DPYD/FGF18/IGF1R/ITGA1/JAK2/LGALS2/MSH2/NRP1/PALLD/SNX1/STAT1/STAT3/TACSTD2/TGFBR2	19
DO	DOID:1852	intrahepatic cholestasis	3/315	18/8007	0.0317426	0.645763	0.639028	HLA-DQB1/HLA-DRB1/NR1H4	3
DO	DOID:3262	phagocyte bactericidal dysfunction	3/315	18/8007	0.0317426	0.645763	0.639028	MECOM/NCF4/PRDM16	3
DO	DOID:3480	uveal disease	5/315	46/8007	0.0334728	0.660326	0.65344	ESD/HLA-DQB1/HLA-DRB1/HSPA1L/PAX6	5
DO	DOID:452	pleomorphic adenoma	3/315	20/8007	0.0418697	0.745917	0.738138	BRCA1/PDGFRA/TNXB	3
DO	DOID:1070	primary open angle glaucoma	5/315	50/8007	0.0456316	0.745917	0.738138	CYP46A1/LDLR/TAP1/VAV2/VAV3	5
DO	DOID:627	severe combined immunodeficiency	5/315	50/8007	0.0456316	0.745917	0.738138	ADARB1/DPP4/HLA-DRB1/IL7/JAK2	5
DO	DOID:12716	newborn respiratory distress syndrome	4/315	35/8007	0.0471862	0.745917	0.738138	DMBT1/F3/PI3/PROC	4
DO	DOID:4254	osteosclerosis	3/315	21/8007	0.047469	0.745917	0.738138	CLCN7/LRP5/VAV3	3
DO	DOID:50	thyroid gland disease	11/315	159/8007	0.0486919	0.745917	0.738138	CASQ2/CD80/CHGA/HLA-DPB1/HLA-DQB1/HLA-DRB1/IGF1R/POU1F1/ST3GAL1/TAP1/TPO	11
